# Supplementary material for: Photoredox-catalyzed difunctionalization of alkenes with oxime esters and NH-sulfoximines
Source: Royal Society of Chemistry journal article supplement (doi:10.1039/d3qo01575k), 2023-11-21
Supplement: d3qo01575k1.pdf [file d3qo01575k1.pdf]

## Supporting Information

### Photoredox catalyzed difunctionalization of alkenes with oxime esters and *NH*-Sulfoximines

Hao-Cong Li,<sup>a</sup> Guan-Nan Li,<sup>a</sup> Hao-Sen Wang,<sup>a</sup> Yan Tan,<sup>ab</sup> Xiao-Lan Chen,<sup>a\*</sup> and Bing Yu<sup>a\*</sup>

<sup>a</sup> Green Catalysis Center, College of Chemistry, Zhengzhou University, Zhengzhou 450001, China.

<sup>b</sup> National Engineering Research Center of Low-Carbon Processing and Utilization of Forest Biomass, Nanjing Forestry University, Nanjing 210037, China

E-mail: chenxl@zzu.edu.cn; bingyu@zzu.edu.cn

### Table of Contents

|                                             |     |
|---------------------------------------------|-----|
| 1. General information .....                | S2  |
| 2. Experimental procedures .....            | S3  |
| 3. Mechanistic studies .....                | S9  |
| 4. Characterization data for products ..... | S13 |
| 5. NMR copies of product .....              | S26 |
| 6. References .....                         | S61 |

## 1. General information

All commercial reagents were directly used without further purification. Reactions were monitored by Thin Layer Chromatography (TLC) using UV light (254/365 nm) for detection. Products were purified by column chromatography, which was carried out on 200-300 mesh of silica gel purchased from Qing Dao Hai Yang Chemical Industry Co. All nuclear magnetic resonance (NMR) spectra were recorded on a Bruker Avance 400 MHz in  $\text{CDCl}_3$  at room temperature ( $20 \pm 3 \text{ }^\circ\text{C}$ ), by using tetramethylsilane as the internal standard. High-resolution mass spectra (HRMS) were conducted on a 3000-mass spectrometer, using Waters Q-ToF MS/MS system with the ESI technique. A Kessil PR160L-456 nm lamp was placed 5-6 cm away from the reaction vessel for light irradiation.

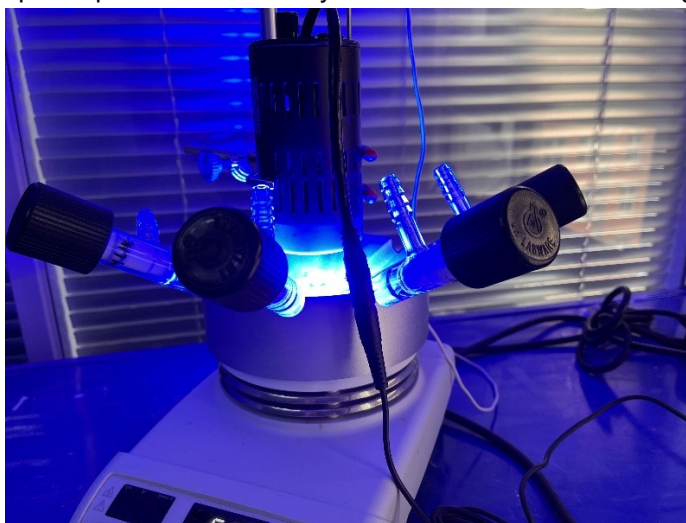

**Figure S1.** The visible-light irradiation instrument

## 2. Experimental procedures

### 2.1 Optimization of reaction conditions

**Table S1.** Optimizations of photocatalysts<sup>a</sup>

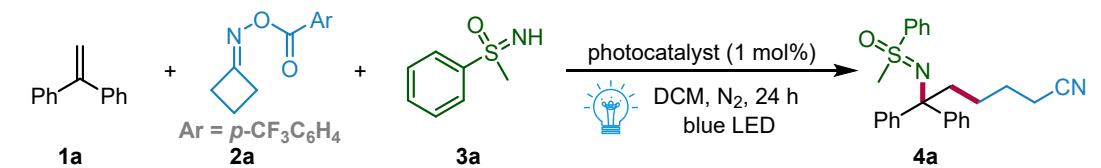

**Table S1.** Optimizations of photocatalysts<sup>a</sup>

| Entry | Photocatalyst                                                    | Yield (%) |
|-------|------------------------------------------------------------------|-----------|
| 1     | Ir[dF(CF <sub>3</sub> )ppy] <sub>2</sub> (dtbbpy)PF <sub>6</sub> | 55        |
| 2     | Ir(dFppy) <sub>2</sub> (bpy)PF <sub>6</sub>                      | 67        |
| 3     | Ir(dFppy) <sub>3</sub>                                           | 60        |
| 4     | Ir(p-Fppy) <sub>2</sub> (bpy)PF <sub>6</sub>                     | 75        |
| 5     | Ir(ppy) <sub>3</sub>                                             | 70        |
| 6     | Eosin Y                                                          | trace     |
| 7     | Eosin B                                                          | trace     |
| 8     | Rose Bengal                                                      | trace     |

<sup>a</sup>Reaction conditions: **1a** (0.3 mmol), **2a** (0.1 mmol), **3a** (0.3 mmol), photocatalyst (1 mol%), DCM (1 mL), 40 W blue Kessil LED lamp (456 nm), under N<sub>2</sub> for 24 h. Isolated yields were given.

**Table S2.** Optimizations of solvents<sup>a</sup>

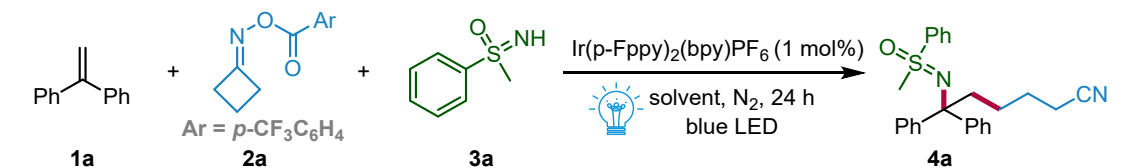

**Table S2.** Optimizations of solvents<sup>a</sup>

| Entry | Solvent            | Yield (%) |
|-------|--------------------|-----------|
| 1     | DCE                | 66        |
| 2     | THF                | 40        |
| 3     | CH <sub>3</sub> CN | 55        |
| 4     | DMC                | 20        |
| 5     | Toluene            | trace     |
| 6     | DMF                | trace     |
| 7     | 1,4-Dioxane        | trace     |
| 8     | DMSO               | N.D.      |
| 9     | DMA                | N.D.      |
| 10    | DCM                | 75        |

<sup>a</sup>Reaction conditions: **1a** (0.3 mmol), **2a** (0.1 mmol), **3a** (0.3 mmol), Ir(p-Fppy)<sub>2</sub>(bpy)PF<sub>6</sub> (1 mol%), solvent (1 mL), 40 W blue Kessil LED lamp (456 nm), under N<sub>2</sub> for 24 h. Isolated yields were given.

**Table S3.** Optimizations of reaction time<sup>a</sup>

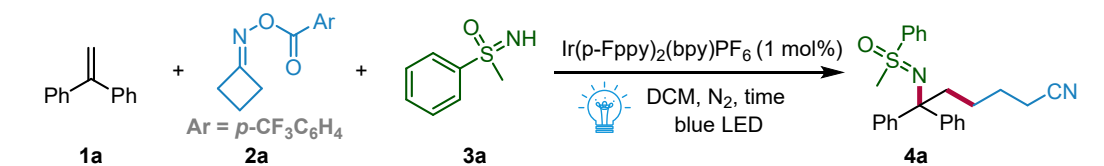

**Table S3.** Optimizations of reaction time<sup>a</sup>

| Entry | Time | Yield (%) |
|-------|------|-----------|
| 1     | 12 h | 77        |
| 2     | 8 h  | 65        |
| 3     | 4 h  | 32        |

<sup>a</sup>Reaction conditions: **1a** (0.3 mmol), **2a** (0.1 mmol), **3a** (0.3 mmol), Ir(p-Fppy)<sub>2</sub>(bpy)PF<sub>6</sub> (1 mol%), DCM (1 mL), 40 W blue Kessil LED lamp (456 nm), under N<sub>2</sub>. Isolated yields were given.

**Table S4.** Optimizations of substrate ratio<sup>a</sup>

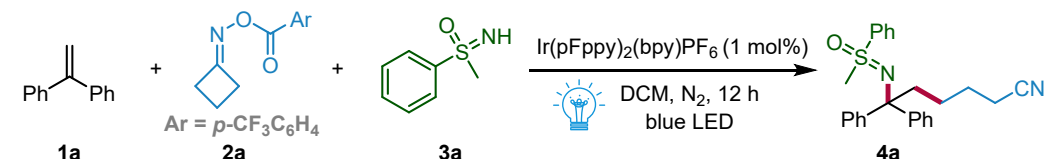

| Entry | Substrate ratio<br>( <b>1a:2a:3a</b> ) | Yield (%) |
|-------|----------------------------------------|-----------|
| 1     | 1:1:3                                  | 60        |
| 2     | 2:1:3                                  | 66        |
| 3     | 4:1:3                                  | 82        |
| 4     | 4:1:1                                  | 71        |
| 5     | 4:1:2                                  | 75        |
| 6     | 4:1:4                                  | 90        |

<sup>a</sup>Reaction conditions: the ratio of **1a:2a:3a** as shown in Table (0.1 mmol scale), Ir(p-Fppy)<sub>2</sub>(bpy)PF<sub>6</sub> (1 mol%), DCM (1 mL), 40 W blue Kessil LED lamp (456 nm), under N<sub>2</sub> for 12 h. Isolated yields were given.

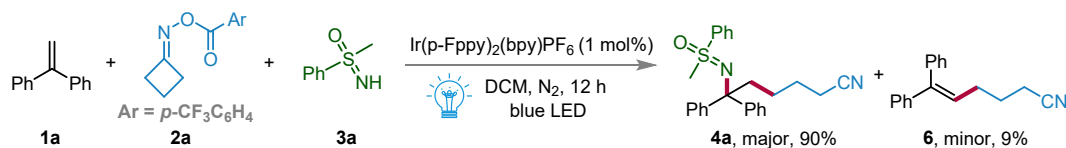

The photocatalytic reactions had a byproduct. It is assumed that excessive alkenes and sulfoximines might inhibit the generation of the byproduct, promoting the yield of the major product **4a**.

## 2.2 Preparation of starting materials **2** and **3**

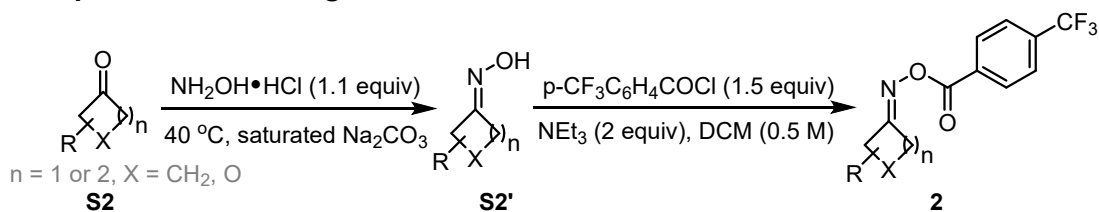

According to a modified literature procedure,<sup>1</sup> the ketone **S2** (10 mmol, 1 equiv) and hydroxylamine hydrochloride (11 mmol, 1.1 equiv) were placed in a 50 mL round-bottom flask equipped with stirrer. The pH of the solution was maintained at 7–8 by adding saturated aq. sodium carbonate (20 mL), and the mixture was stirred at  $40\text{ }^\circ\text{C}$ . After the reaction, the mixture was extracted with ether and water. The aqueous layer was extracted with ether (10 mL  $\times$  3 times). The combined organic layer was washed with saturated brine and dried over anhydrous  $\text{Na}_2\text{SO}_4$ . After filtration, the solvent was evaporated in vacuo, providing the crude products **S2'** which were used in the next step without further purification. Then the oximes **S2'** (5 mmol, 1 equiv) and triethylamine (1.5 equiv) were dissolved in  $\text{DCM}$  (10 mL). The  $p\text{-CF}_3\text{benzoyl}$  chloride (1.5 equiv) was slowly added at  $0\text{ }^\circ\text{C}$  and the mixture was stirred overnight at room temperature. After the reaction, sodium bicarbonate solution (20 mL) was added to the reaction system. Then the mixture was diluted with water and ethyl acetate, the aqueous layer was extracted with ethyl acetate (20 mL  $\times$  3 times). The combined organic layer was washed with saturated brine and dried over anhydrous  $\text{Na}_2\text{SO}_4$ . After filtration, the solvent was evaporated in vacuo, and the residue was purified by silica gel column chromatography to obtain the desired products **2**.

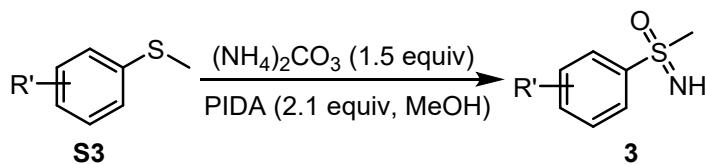

According to a modified literature procedure,<sup>2</sup> in a 50 mL round-bottom flask, sulfides **S3** (10 mmol, 1 equiv) and ammonium carbonate (15 mmol, 1.5 equiv) were dissolved in  $\text{MeOH}$  (20 mL), which was stirred at room temperature. Then PIDA (21 mmol, 2.1 equiv) was added in one portion. After the reaction, the mixture was extracted with  $\text{DCM}$  and water, the aqueous layer was extracted with  $\text{DCM}$  (20 mL  $\times$  3 times). The combined organic layer was washed with saturated brine and dried over anhydrous  $\text{Na}_2\text{SO}_4$ . After filtration, the solvent was evaporated in vacuo, and the residue was purified by silica gel column chromatography to obtain the desired products **3**.

## 2.3 General experimental procedures for the desired products

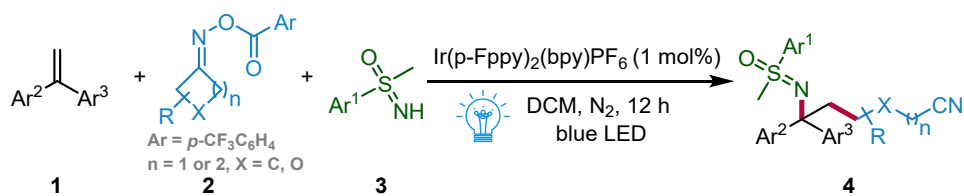

In a 10 mL Schlenk tube, **1** (4.0 equiv, 0.4 mmol), **2** (1.0 equiv, 0.1 mmol), **3** (4.0 equiv, 0.4 mmol), Ir(p-Fppy)<sub>2</sub>(bpy)PF<sub>6</sub> (1 mol%) were dissolved in DCM (1 mL), and then charging with nitrogen more than three times. The tube was stirred for 12 h with the irradiation of 40 W blue LED ( $\lambda = 456 \text{ nm}$ ). After the reaction, the mixture was extracted with water and ethyl acetate, and the organic layer was washed with saturated brine and dried over anhydrous Na<sub>2</sub>SO<sub>4</sub>. After filtration, the solvent was evaporated in vacuo, and the residue was purified by column chromatography on silica gel to afford the desired products **4**.

Unsuccessful substrates:

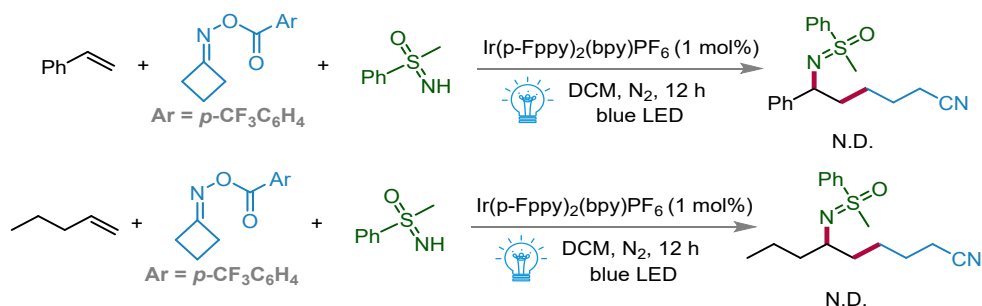

## 2.4 The gram-scale synthesis of **4a**

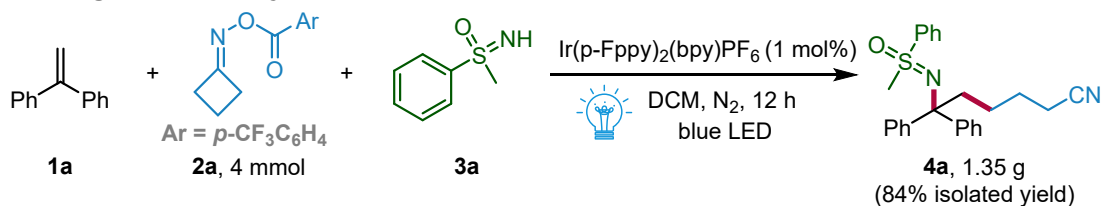

In a 100 mL three-neck flask, **1a** (16.0 mmol, 4.0 equiv), **2a** (4.0 mmol, 1.0 equiv), **3a** (16.0 mmol, 4.0 equiv) and Ir(p-Fppy)<sub>2</sub>(bpy)PF<sub>6</sub> (1 mol%) were dissolved in DCM (40 mL), and then the tube was stirred for 12 h with the irradiation of blue LED. After the reaction, the mixture was extracted with water and ethyl acetate, and the organic layer was washed with saturated brine and dried over anhydrous Na<sub>2</sub>SO<sub>4</sub>. After filtration, the solvent was evaporated in vacuo, and the residue was purified by column chromatography on silica gel to afford the desired product **4a** in 84% yield (1.35 g).

## 2.5 The synthetic transformation of **4a**

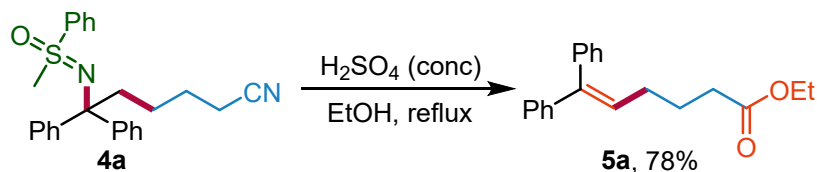

**4a** (0.1 mmol) was added into a 25 mL round bottom flask. Concentrated  $\text{H}_2\text{SO}_4$  (0.2 mL) and EtOH (1 mL) were then added sequentially via syringe. The resulting mixture was heated to reflux for 12 hours. After the reaction, the solvent was removed under vacuum, and the residue was purified by column chromatography on silica gel to afford the desired product **5a** in 78% yield.

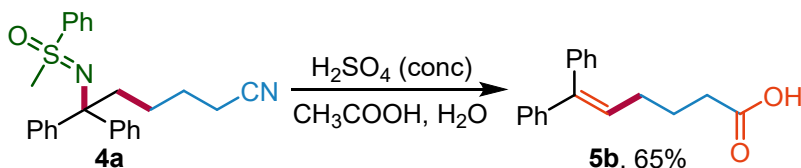

**4a** (0.5 mmol) was added into a 25 mL round bottom flask. Concentrated  $\text{H}_2\text{SO}_4$  (0.3 mL),  $\text{CH}_3\text{COOH}$  (0.5 mL), and  $\text{H}_2\text{O}$  (0.5 mL) were then added sequentially via syringe. The resulting mixture was heated to reflux for 24 hours. After the reaction, the solvent was removed under vacuum, and the residue was purified by column chromatography on silica gel to give **5b** as white solid in 65% yield.

## 2.6 The photocatalyzed synthetic applications

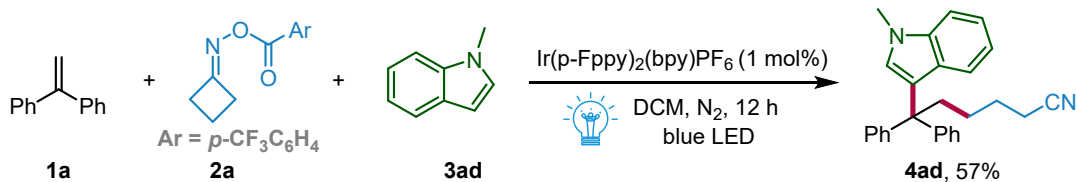

In a 10 mL Schlenk tube, **1a** (4.0 equiv, 0.4 mmol), **2a** (1.0 equiv, 0.1 mmol), **3ad** (4.0 equiv, 0.4 mmol),  $\text{Ir}(\text{p-Fppy})_2(\text{bpy})\text{PF}_6$  (1 mol%) were dissolved in DCM (1 mL), and then charging with nitrogen more than three times. The tube was stirred for 12 h with the irradiation of 40 W blue LED ( $\lambda = 456 \text{ nm}$ ). After the reaction, the mixture was extracted with water and ethyl acetate, and the organic layer was washed with saturated brine and dried over anhydrous  $\text{Na}_2\text{SO}_4$ . After filtration, the solvent was evaporated in vacuo, and the residue was purified by column chromatography on silica gel to afford the desired product **4ad**.

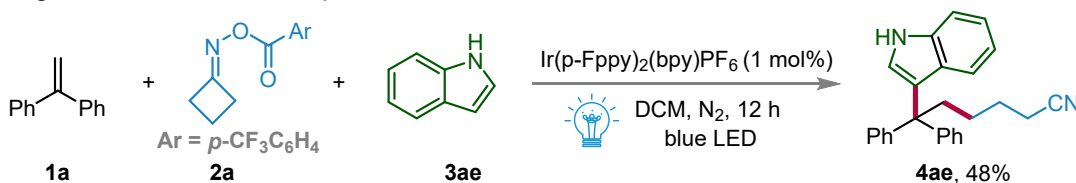

In a 10 mL Schlenk tube, **1a** (4.0 equiv, 0.4 mmol), **2a** (1.0 equiv, 0.1 mmol), **3ae** (4.0 equiv, 0.4

mmol), Ir(p-Fppy)<sub>2</sub>(bpy)PF<sub>6</sub> (1 mol%) were dissolved in DCM (1 mL), and then charging with nitrogen more than three times. The tube was stirred for 12 h with the irradiation of 40 W blue LED ( $\lambda = 456$  nm). After the reaction, the mixture was extracted with water and ethyl acetate, and the organic layer was washed with saturated brine and dried over anhydrous Na<sub>2</sub>SO<sub>4</sub>. After filtration, the solvent was evaporated in vacuo, and the residue was purified by column chromatography on silica gel to afford the desired product **4ae**.

## 2.7 Assessment of the sensitivity of the transformation

A set of experiments that employed **1a** with **2a** and **3a** were performed to evaluate the reaction-condition-based sensitivity of this conversion, which will be valuable in increasing the insight of this new synthetic method and reproducibility. Various parameters including concentration, water level, air atmosphere, photocatalyst level, light intensity, and scale were chosen with positive and negative direction relative to the standard reaction conditions. Each experiment only deliberately changed one parameter, while keeping others at standard levels.

**Table S5.** Assessment of the sensitivity of the transformation<sup>a</sup>

| Parameter              | Variation             |                                                                       | Description                               | Yield (%) <sup>b</sup> |
|------------------------|-----------------------|-----------------------------------------------------------------------|-------------------------------------------|------------------------|
| Concentration (c)      | High c                | c + 10% c                                                             | 0.9 mL DCM                                | 74                     |
|                        | Low c                 | c - 10% c                                                             | 1.1 mL DCM                                | 86                     |
| H <sub>2</sub> O level | High H <sub>2</sub> O | + H <sub>2</sub> O; V <sub>H<sub>2</sub>O</sub> = 1% V <sub>rxn</sub> | 10 $\mu$ L H <sub>2</sub> O in 1.0 mL DCM | 70                     |
| Air atmosphere         | Air                   | Air                                                                   | Air instead of N <sub>2</sub>             | 0                      |
| Photocatalyst (x mol%) | Low photocatalyst     | x/2                                                                   | 0.5 mol%                                  | 75                     |
|                        | High photocatalyst    | 3·x                                                                   | 3 mol%                                    | 71                     |
| Light intensity (W)    | Low W                 | W/16                                                                  | 2.5 W                                     | 67                     |
| Scale                  | Big scale             | n·10                                                                  | 1.0 mmol of <b>2a</b>                     | 85                     |

<sup>a</sup>Reaction conditions: **1a** (0.4 mmol), **2a** (0.1 mmol), **3a** (0.4 mmol), Ir(p-Fppy)<sub>2</sub>(bpy)PF<sub>6</sub> (1 mol%), DCM (1 mL), 40 W blue Kessil LED lamp (456 nm), under N<sub>2</sub> for 12 h. <sup>b</sup>The average yield of three parallel reactions.



### 3. Mechanistic studies

#### 3.1 Control experiments

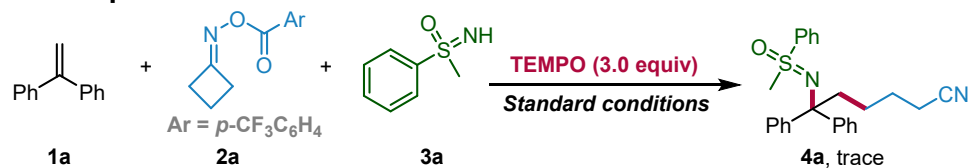

In a 10 mL Schlenk tube, **1a** (4.0 equiv, 0.4 mmol), **2a** (1.0 equiv, 0.1 mmol), **3a** (4.0 equiv, 0.4 mmol), Ir(*p*-Fppy)<sub>2</sub>(bpy)PF<sub>6</sub> (1 mol%) were dissolved in DCM (1 mL). Afterward, (2,6-ditert-butyl-4-methyl-phenol) (TEMPO, 3.0 equiv) was added in the mixture, and then charging with nitrogen more than three times. The tube was stirred for 12 h with the irradiation of 40 W blue LED ( $\lambda = 456$  nm). After the reaction, the yield of **4a** was detected by column chromatography on silica gel.

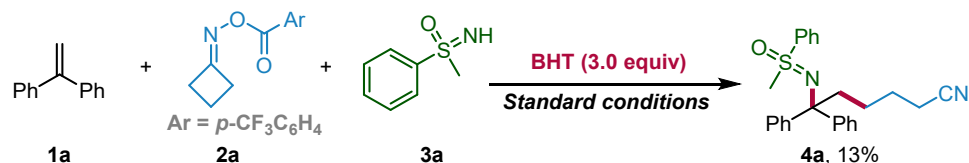

In a 10 mL Schlenk tube, **1a** (4.0 equiv, 0.4 mmol), **2a** (1.0 equiv, 0.1 mmol), **3a** (4.0 equiv, 0.4 mmol), Ir(*p*-Fppy)<sub>2</sub>(bpy)PF<sub>6</sub> (1 mol%) were dissolved in DCM (1 mL). Afterward, (2,6-ditert-butyl-4-methyl-phenol) (BHT, 3.0 equiv) was added in the mixture, and then charging with nitrogen more than three times. The tube was stirred for 12 h with the irradiation of 40 W blue LED ( $\lambda = 456$  nm). After the reaction, the yield of **4a** was detected by column chromatography on silica gel.

#### 3.2 HRMS analysis of model reaction solution

To understand the reaction mechanism more deeply, we employed high-resolution mass spectrometry (HRMS) to analyze the reaction solution of the model reaction. The *m/z* 247.1778 obviously corresponds to the molecular ion [C<sub>13</sub>H<sub>24</sub>N<sub>2</sub>NaO]<sup>+</sup> as shown in Figure S2. The *m/z* 310.2146 obviously corresponds to the molecular ion [C<sub>19</sub>H<sub>29</sub>NNaO]<sup>+</sup> as shown in Figure S3. The *m/z* 333.1611 obviously corresponds to the molecular ion [C<sub>16</sub>H<sub>26</sub>N<sub>2</sub>NaO<sub>2</sub>S]<sup>+</sup> as shown in Figure S4.

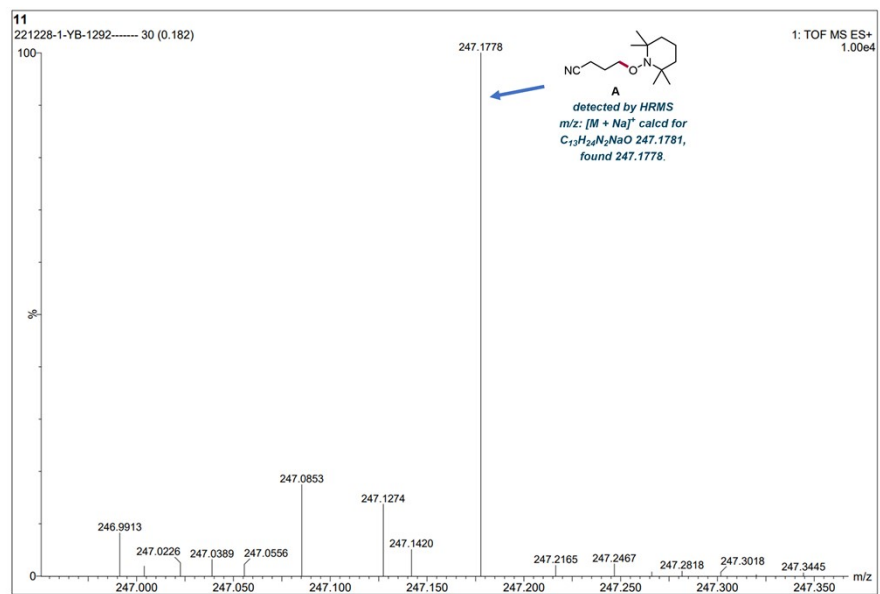

**Figure S2.** The HRMS analysis of reaction in the presence of TEMPO

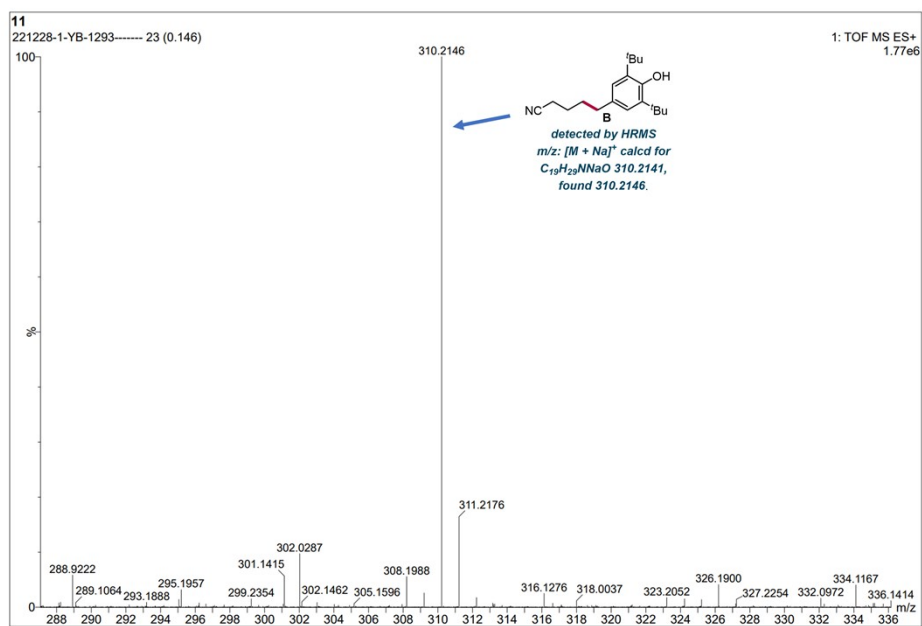

**Figure S3.** The HRMS analysis of reaction in the presence of BHT

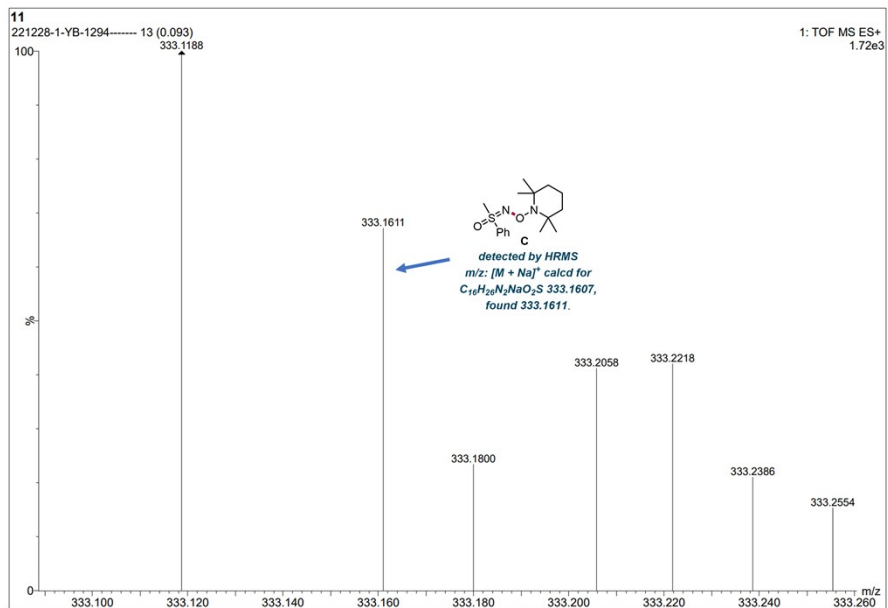

**Figure S4.** The HRMS analysis of reaction in the presence of TEMPO

### 3.3 Procedure for fluorescence quenching experiments

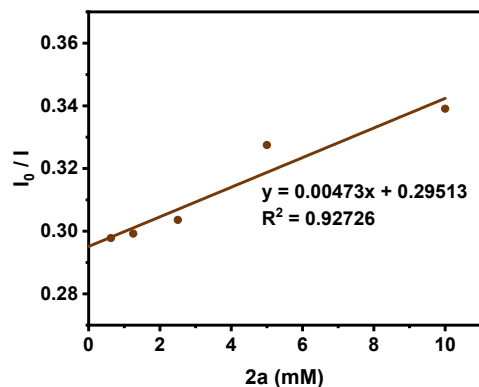

**Figure S5** Fluorescence quenching experiments.

Stern-Volmer fluorescence quenching experiments were run with a freshly prepared solution of  $5 \times 10^{-5}$  M solution of  $\text{Ir}(\text{p-Fppy})_2(\text{bpy})\text{PF}_6$  in dry DCM added the appropriate amount of a quencher in a screw-top quartz cuvette at room temperature (Figure S5). Emission intensities were recorded using an F-4600 FL Spectrophotometer. The fluorescence emission spectrum was measured from 380 nm to 750 nm. After degassing the sample with a stream of  $\text{N}_2$  for 10 minutes, the emission of the sample was collected.

#### 4. Characterization data for products

##### 6-((methyl(oxo)(phenyl)-sulfaneylidene)amino)-6,6-diphenylhexanenitrile (4a)

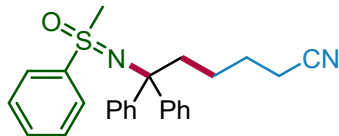

Purified by flash chromatography (silica gel, petroleum ether/ethyl acetate from 20:1 to 5:1, v/v) to give the desired product: colorless oil (36.2 mg, 90%),  $^1\text{H}$  NMR (400 MHz, Chloroform-*d*)  $\delta$  7.78 – 7.72 (m, 2H), 7.48 – 7.41 (m, 3H), 7.39 – 7.33 (m, 2H), 7.29 – 7.23 (m, 4H), 7.21 – 7.16 (m, 1H), 7.09 – 6.99 (m, 3H), 2.57 (s, 3H), 2.55 – 2.42 (m, 2H), 2.31 – 2.18 (m, 2H), 1.67 – 1.58 (m, 2H), 1.42 – 1.26 (m, 2H).  $^{13}\text{C}$  NMR (101 MHz, Chloroform-*d*)  $\delta$  148.3, 147.5, 143.0, 131.8, 128.7, 127.9, 127.73, 127.65, 127.4, 127.1, 126.5, 126.1, 120.1, 67.3, 46.6, 41.8, 25.9, 23.7, 17.0. HRMS (ESI-TOF)  $m/z$ :  $[\text{M} + \text{Na}]^+$  calcd for  $\text{C}_{25}\text{H}_{26}\text{N}_2\text{NaOS}$ , 425.1658; found, 425.1661.

##### 6-((methyl(oxo)(*p*-tolyl)-sulfaneylidene)amino)-6,6-diphenylhexanenitrile (4b)

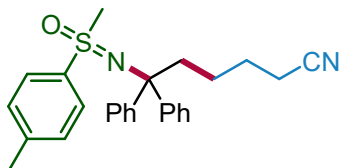

Purified by flash chromatography (silica gel, petroleum ether/ethyl acetate from 20:1 to 5:1, v/v) to give the desired product: colorless oil (40.8 mg, 98%),  $^1\text{H}$  NMR (400 MHz, Chloroform-*d*)  $\delta$  7.71 – 7.61 (m, 2H), 7.49 – 7.42 (m, 2H), 7.29 – 7.24 (m, 4H), 7.22 – 7.16 (m, 3H), 7.12 – 7.01 (m, 3H), 2.50 (s, 3H), 2.50 – 2.43 (m, 2H), 2.38 (s, 3H), 2.32 – 2.18 (m, 2H), 1.65 – 1.60 (m, 2H), 1.49 – 1.37 (m, 1H), 1.31 – 1.23 (m, 1H).  $^{13}\text{C}$  NMR (101 MHz, Chloroform-*d*)  $\delta$  148.4, 147.8, 142.4, 140.3, 129.3, 127.9, 127.8, 127.6, 127.4, 127.2, 126.5, 125.9, 120.1, 67.2, 46.4, 41.7, 25.9, 23.7, 21.4, 17.0. HRMS (ESI-TOF)  $m/z$ :  $[\text{M} + \text{Na}]^+$  calcd for  $\text{C}_{26}\text{H}_{28}\text{N}_2\text{NaOS}$ , 439.1815; found, 439.1819.

##### 6-(((4-methoxyphenyl)(methyl)(oxo)-sulfaneylidene)amino)-6,6-diphenylhexanenitrile (4c)

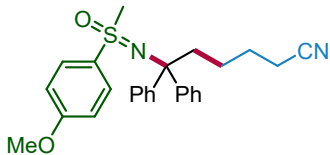

Purified by flash chromatography (silica gel, petroleum ether/ethyl acetate from 20:1 to 5:1, v/v) to give the desired product: colorless oil (41.0 mg, 95%),  $^1\text{H}$  NMR (400 MHz, Chloroform-*d*)  $\delta$  7.74 – 7.65 (m, 2H), 7.49 – 7.42 (m, 2H), 7.30 – 7.25 (m, 4H), 7.23 – 7.16 (m, 1H), 7.14 – 7.02 (m, 3H), 6.90 – 6.80 (m, 2H), 3.83 (s, 3H), 2.52 (s, 3H), 2.50 – 2.43 (m, 2H), 2.33 – 2.17 (m, 2H), 1.66 – 1.60 (m, 2H), 1.47 – 1.27 (m, 2H).  $^{13}\text{C}$  NMR (101 MHz, Chloroform-*d*)  $\delta$  162.3, 148.4, 147.8, 134.8,

129.2, 127.9, 127.7, 127.6, 127.4, 126.5, 126.0, 120.1, 113.9, 67.2, 55.6, 46.7, 41.7, 25.9, 23.7, 17.0. HRMS (ESI-TOF)  $m/z$ :  $[M + Na]^+$  calcd for  $C_{26}H_{28}N_2NaO_2S$ , 455.1764; found, 455.1765.

**6-(((4-fluorophenyl)(methyl)(oxo)-sulfaneylidene)amino)-6,6-diphenylhexanenitrile (4d)**

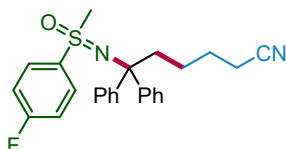

Purified by flash chromatography (silica gel, petroleum ether/ethyl acetate from 20:1 to 5:1, v/v) to give the desired product: colorless oil (34.4 mg, 82%),  $^1H$  NMR (400 MHz, Chloroform- $d$ )  $\delta$  7.72 – 7.65 (m, 2H), 7.46 – 7.41 (m, 2H), 7.29 – 7.24 (m, 2H), 7.22 – 7.16 (m, 3H), 7.08 – 6.95 (m, 5H), 2.65 (s, 3H), 2.59 – 2.50 (m, 1H), 2.45 – 2.35 (m, 1H), 2.32 – 2.18 (m, 2H), 1.68 – 1.58 (m, 2H), 1.42 – 1.29 (m, 2H).  $^{13}C$  NMR (101 MHz, Chloroform- $d$ )  $\delta$  164.6 (d,  $J = 253.2$  Hz), 148.1, 147.1, 138.8 (d,  $J = 3.0$  Hz), 129.9, 129.8, 127.9, 127.8, 127.7, 127.4, 126.5, 126.2, 120.1, 115.7 (d,  $J = 22.5$  Hz), 67.4, 47.0, 41.8, 25.8, 23.7, 17.0.  $^{19}F$  NMR (376 MHz, Chloroform- $d$ )  $\delta$  -107.38. HRMS (ESI-TOF)  $m/z$ :  $[M + Na]^+$  calcd for  $C_{25}H_{25}FN_2NaOS$ , 443.1564; found, 443.1564.

**6-(((4-chlorophenyl)(methyl)(oxo)-sulfaneylidene)amino)-6,6-diphenylhexanenitrile (4e)**

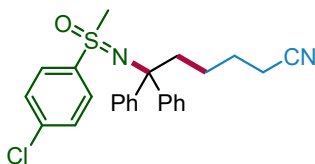

Purified by flash chromatography (silica gel, petroleum ether/ethyl acetate from 20:1 to 5:1, v/v) to give the desired product: white oil (42.3 mg, 97%),  $^1H$  NMR (400 MHz, Chloroform- $d$ )  $\delta$  7.62 – 7.57 (m, 2H), 7.46 – 7.40 (m, 2H), 7.30 – 7.25 (m, 4H), 7.22 – 7.16 (m, 3H), 7.08 – 7.01 (m, 3H), 2.67 (s, 3H), 2.59 – 2.49 (m, 1H), 2.44 – 2.34 (m, 1H), 2.33 – 2.21 (m, 2H), 1.67 – 1.62 (m, 2H), 1.43 – 1.27 (m, 2H).  $^{13}C$  NMR (101 MHz, Chloroform- $d$ )  $\delta$  148.0, 147.0, 141.4, 138.2, 128.8, 128.7, 127.9, 127.8, 127.6, 127.4, 126.5, 126.2, 120.1, 67.4, 46.8, 41.8, 25.8, 23.6, 17.0. HRMS (ESI-TOF)  $m/z$ :  $[M + Na]^+$  calcd for  $C_{25}H_{25}ClN_2NaOS$ , 459.1268; found, 459.1268.

**6-(((4-bromophenyl)(methyl)(oxo)-sulfaneylidene)amino)-6,6-diphenylhexanenitrile (4f)**

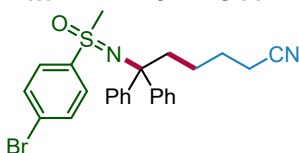

Purified by flash chromatography (silica gel, petroleum ether/ethyl acetate from 20:1 to 5:1, v/v) to give the desired product: colorless oil (35.5 mg, 74%),  $^1H$  NMR (400 MHz, Chloroform- $d$ )  $\delta$  7.55 – 7.49 (m, 2H), 7.47 – 7.39 (m, 4H), 7.28 – 7.23 (m, 2H), 7.23 – 7.15 (m, 3H), 7.08 – 6.99 (m, 3H),

2.67 (s, 3H), 2.59 – 2.49 (m, 1H), 2.42 – 2.22 (m, 3H), 1.65 – 1.61 (m, 2H), 1.40 – 1.27 (m, 2H). <sup>13</sup>C NMR (101 MHz, Chloroform-*d*) δ 148.0, 147.0, 141.9, 131.8, 128.8, 127.9, 127.8, 127.6, 127.4, 126.6, 126.5, 126.2, 120.1, 67.4, 46.8, 41.8, 25.8, 23.6, 17.0. HRMS (ESI-TOF) *m/z*: [M + Na]<sup>+</sup> calcd for C<sub>25</sub>H<sub>25</sub>BrN<sub>2</sub>NaOS, 503.0763; found, 503.0768.

**6-(((4-acetylphenyl)(methyl)(oxo)-sulfaneylidene)amino)-6,6-diphenylhexanenitrile (4g)**

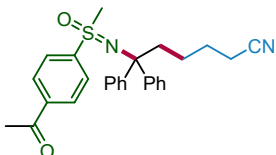

Purified by flash chromatography (silica gel, petroleum ether/ethyl acetate from 20:1 to 5:1, v/v) to give the desired product: white oil (40.0 mg, 90%), <sup>1</sup>H NMR (400 MHz, Chloroform-*d*) δ 7.89 – 7.84 (m, 2H), 7.77 – 7.72 (m, 2H), 7.45 – 7.41 (m, 2H), 7.29 – 7.24 (m, 2H), 7.22 – 7.15 (m, 3H), 7.03 – 6.94 (m, 3H), 2.72 (s, 3H), 2.61 (s, 3H), 2.59 – 2.51 (m, 1H), 2.43 – 2.34 (m, 1H), 2.32 – 2.23 (m, 2H), 1.68 – 1.61 (m, 2H), 1.45 – 1.29 (m, 2H). <sup>13</sup>C NMR (101 MHz, Chloroform-*d*) δ 197.0, 147.9, 146.90, 146.87, 139.1, 128.5, 127.9, 127.8, 127.6, 127.5, 127.4, 126.5, 126.2, 120.1, 67.5, 46.6, 41.8, 26.9, 25.8, 23.6, 17.0. HRMS (ESI-TOF) *m/z*: [M + Na]<sup>+</sup> calcd for C<sub>27</sub>H<sub>28</sub>N<sub>2</sub>NaO<sub>2</sub>S, 467.1764; found, 467.1767.

**4-(N-(5-cyano-1,1-diphenylpentyl)-methylsulfonimidoyl)benzonitrile (4h)**

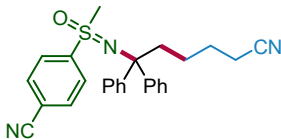

Purified by flash chromatography (silica gel, petroleum ether/ethyl acetate from 20:1 to 5:1, v/v) to give the desired product: lightyellow oil (38.9 mg, 91%), <sup>1</sup>H NMR (400 MHz, Chloroform-*d*) δ 7.70 – 7.65 (m, 2H), 7.58 – 7.52 (m, 2H), 7.42 – 7.37 (m, 2H), 7.28 – 7.24 (m, 2H), 7.22 – 7.17 (m, 1H), 7.13 – 7.08 (m, 2H), 7.00 – 6.93 (m, 3H), 2.84 (s, 3H), 2.65 – 2.56 (m, 1H), 2.37 – 2.22 (m, 3H), 1.67 – 1.61 (m, 2H), 1.32 – 1.13 (m, 2H). <sup>13</sup>C NMR (101 MHz, Chloroform-*d*) δ 147.6, 147.1, 146.3, 132.3, 128.0, 127.93, 127.85, 127.5, 127.4, 126.6, 126.4, 120.0, 117.6, 115.1, 67.7, 46.9, 41.8, 25.7, 23.6, 17.0. HRMS (ESI-TOF) *m/z*: [M + Na]<sup>+</sup> calcd for C<sub>26</sub>H<sub>25</sub>N<sub>3</sub>NaOS, 450.1611; found, 450.1612.

**6-(((3-bromophenyl)(methyl)(oxo)-sulfaneylidene)amino)-6,6-diphenylhexanenitrile (4i)**

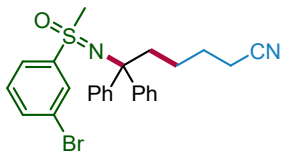

Purified by flash chromatography (silica gel, petroleum ether/ethyl acetate from 20:1 to 5:1, v/v) to give the desired product: lightyellow oil (24 mg, 50%), <sup>1</sup>H NMR (400 MHz, Chloroform-*d*) δ 7.66 – 7.62 (m, 1H), 7.60 – 7.55 (m, 1H), 7.51 – 7.47 (m, 1H), 7.43 – 7.40 (m, 2H), 7.34 – 7.28 (m, 1H), 7.26 – 7.24 (m, 1H), 7.22 – 7.13 (m, 4H), 7.04 – 6.97 (m, 3H), 2.78 (s, 3H), 2.65 – 2.53 (m, 1H), 2.36 – 2.26 (m, 3H), 1.69 – 1.62 (m, 2H), 1.30 – 1.23 (m, 2H). <sup>13</sup>C NMR (101 MHz, Chloroform-*d*) δ 147.9, 146.4, 144.5, 134.5, 130.3, 130.1, 127.9, 127.8, 127.6, 127.3, 126.5, 126.4, 126.0, 125.7, 122.7, 120.1, 67.5, 47.1, 41.8, 25.8, 23.7, 17.0. HRMS (ESI-TOF) *m/z*: [M + Na]<sup>+</sup> calcd for C<sub>25</sub>H<sub>25</sub>BrN<sub>2</sub>NaOS, 503.0763; found, 503.0766.

**6-(((3-methoxyphenyl)(methyl)(oxo)-sulfaneylidene)amino)-6,6-diphenylhexanenitrile (4j)**

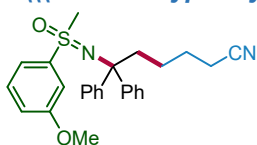

Purified by flash chromatography (silica gel, petroleum ether/ethyl acetate from 20:1 to 5:1, v/v) to give the desired product: white oil (30.7 mg, 71%), <sup>1</sup>H NMR (400 MHz, Chloroform-*d*) δ 7.48 – 7.41 (m, 2H), 7.36 – 7.31 (m, 1H), 7.29 – 7.17 (m, 7H), 7.09 – 6.93 (m, 4H), 3.79 (s, 3H), 2.62 (s, 3H), 2.58 – 2.39 (m, 2H), 2.34 – 2.20 (m, 2H), 1.67 – 1.61 (m, 2H), 1.40 – 1.29 (m, 2H). <sup>13</sup>C NMR (101 MHz, Chloroform-*d*) δ 159.5, 148.3, 147.3, 144.3, 129.7, 127.9, 127.73, 127.71, 127.3, 126.5, 126.0, 120.1, 119.3, 118.1, 112.0, 67.3, 55.5, 46.6, 41.8, 25.9, 23.7, 17.0. HRMS (ESI-TOF) *m/z*: [M + Na]<sup>+</sup> calcd for C<sub>26</sub>H<sub>28</sub>N<sub>2</sub>NaO<sub>2</sub>S, 455.1764; found, 455.1767.

**6-(((2-chlorophenyl)(methyl)(oxo)-sulfaneylidene)amino)-6,6-diphenylhexanenitrile (4k)**

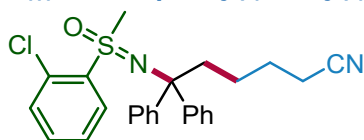

Purified by flash chromatography (silica gel, petroleum ether/ethyl acetate from 20:1 to 5:1, v/v) to give the desired product: colorless oil (30.1 mg, 69%), <sup>1</sup>H NMR (400 MHz, Chloroform-*d*) δ 7.54 – 7.49 (m, 1H), 7.43 – 7.38 (m, 2H), 7.24 – 7.18 (m, 4H), 7.18 – 7.11 (m, 3H), 7.09 – 7.02 (m, 1H), 6.91 – 6.79 (m, 3H), 3.16 (s, 3H), 2.72 – 2.59 (m, 1H), 2.38 – 2.23 (m, 3H), 1.70 – 1.57 (m, 3H), 1.27 – 1.18 (m, 1H). <sup>13</sup>C NMR (101 MHz, Chloroform-*d*) δ 147.7, 145.6, 139.8, 132.4, 131.3, 131.1, 130.9, 127.7, 127.6, 127.5, 127.11, 127.07, 126.3, 126.2, 120.1, 67.6, 45.8, 41.8, 25.9, 23.6, 17.0. HRMS (ESI-TOF) *m/z*: [M + Na]<sup>+</sup> calcd for C<sub>25</sub>H<sub>25</sub>ClN<sub>2</sub>NaOS, 459.1268; found, 459.1269.

**6-(((methyl)(oxo)(*o*-tolyl)-sulfaneylidene)amino)-6,6-diphenylhexanenitrile (4l)**



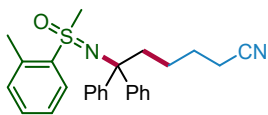

Purified by flash chromatography (silica gel, petroleum ether/ethyl acetate from 20:1 to 5:1, v/v) to give the desired product: colorless oil (29.1 mg, 70%),  $^1\text{H}$  NMR (400 MHz, Chloroform-*d*)  $\delta$  7.80 – 7.74 (m, 1H), 7.47 – 7.41 (m, 2H), 7.30 – 7.25 (m, 3H), 7.22 – 7.09 (m, 5H), 7.01 – 6.92 (m, 3H), 2.70 (s, 3H), 2.65 (s, 3H), 2.61 – 2.52 (m, 1H), 2.49 – 2.39 (m, 1H), 2.32 – 2.23 (m, 2H), 1.66 – 1.62 (m, 2H), 1.37 – 1.26 (m, 2H).  $^{13}\text{C}$  NMR (101 MHz, Chloroform-*d*)  $\delta$  148.2, 146.8, 141.0, 136.2, 132.3, 131.7, 128.7, 127.83, 127.80, 127.6, 127.2, 126.4, 126.2, 126.1, 120.1, 67.7, 45.6, 41.9, 25.9, 23.6, 20.5, 17.0. HRMS (ESI-TOF) *m/z*:  $[\text{M} + \text{Na}]^+$  calcd for  $\text{C}_{26}\text{H}_{28}\text{N}_2\text{NaOS}$ , 439.1815; found, 439.1816.

**6-(((3,5-dichlorophenyl)(methyl)oxo)sulfaneylidene)amino)-6,6-diphenylhexanenitrile (4m)**

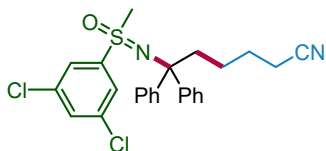

Purified by flash chromatography (silica gel, petroleum ether/ethyl acetate from 20:1 to 5:1, v/v) to give the desired product: colorless oil (30.6 mg, 65%),  $^1\text{H}$  NMR (400 MHz, Chloroform-*d*)  $\delta$  7.42 – 7.38 (m, 2H), 7.34 – 7.31 (m, 2H), 7.30 – 7.24 (m, 3H), 7.22 – 7.17 (m, 1H), 7.12 – 7.08 (m, 2H), 7.05 – 6.89 (m, 3H), 2.92 (s, 3H), 2.70 – 2.57 (m, 1H), 2.35 – 2.21 (m, 3H), 1.68 – 1.55 (m, 3H), 1.23 – 1.12 (m, 1H).  $^{13}\text{C}$  NMR (101 MHz, Chloroform-*d*)  $\delta$  147.5, 145.7, 145.1, 135.3, 131.3, 128.0, 127.8, 127.5, 127.3, 126.7, 126.4, 125.7, 120.0, 67.8, 47.2, 41.7, 25.8, 23.6, 17.0. HRMS (ESI-TOF) *m/z*:  $[\text{M} + \text{Na}]^+$  calcd for  $\text{C}_{25}\text{H}_{24}\text{Cl}_2\text{N}_2\text{NaOS}$ , 493.0879; found, 493.0881.

**6-(((methyl(naphthalen-2-yl)oxo)sulfaneylidene)amino)-6,6-diphenylhexanenitrile (4n)**

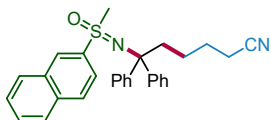

Purified by flash chromatography (silica gel, petroleum ether/ethyl acetate from 20:1 to 5:1, v/v) to give the desired product: colorless oil (28.0 mg, 62%),  $^1\text{H}$  NMR (400 MHz, Chloroform-*d*)  $\delta$  8.23 – 8.16 (m, 1H), 7.89 – 7.83 (m, 2H), 7.82 – 7.78 (m, 1H), 7.77 – 7.72 (m, 1H), 7.62 – 7.54 (m, 2H), 7.50 – 7.45 (m, 2H), 7.29 – 7.19 (m, 5H), 6.98 – 6.93 (m, 2H), 6.88 – 6.83 (m, 1H), 2.69 (s, 3H), 2.60 – 2.41 (m, 2H), 2.32 – 2.22 (m, 2H), 1.67 – 1.62 (m, 2H), 1.41 – 1.36 (m, 1H), 1.28 – 1.22 (m, 1H).  $^{13}\text{C}$  NMR (101 MHz, Chloroform-*d*)  $\delta$  148.3, 147.3, 139.8, 134.4, 132.3, 129.1, 128.8, 128.4, 128.2, 127.9, 127.73, 127.70, 127.3, 127.1, 126.5, 126.0, 122.8, 120.1, 67.4, 46.6, 41.8, 25.9, 23.7, 17.0. HRMS (ESI-TOF) *m/z*:  $[\text{M} + \text{Na}]^+$  calcd for  $\text{C}_{29}\text{H}_{28}\text{N}_2\text{NaOS}$ , 475.1815; found, 475.1819.

**6-((methyl(oxo)(pyridin-3-yl)-sulfaneylidene)amino)-6,6-diphenylhexanenitrile (4o)**

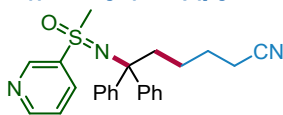

Purified by flash chromatography (silica gel, petroleum ether/ethyl acetate from 20:1 to 5:1, v/v) to give the desired product: colorless oil (32.2 mg, 80%),  $^1\text{H}$  NMR (400 MHz, Chloroform-*d*)  $\delta$  8.48 (d, 1H), 7.55 – 7.49 (m, 1H), 7.49 – 7.44 (m, 1H), 7.39 – 7.34 (m, 2H), 7.24 – 7.19 (m, 3H), 7.16 – 7.10 (m, 3H), 6.95 – 6.88 (m, 3H), 3.07 (s, 3H), 2.66 – 2.58 (m, 1H), 2.38 – 2.28 (m, 3H), 1.69 – 1.62 (m, 2H), 1.33 – 1.23 (m, 2H).  $^{13}\text{C}$  NMR (101 MHz, Chloroform-*d*)  $\delta$  160.2, 149.0, 148.1, 146.9, 137.3, 127.9, 127.6, 127.4, 127.2, 126.1, 126.0, 125.2, 121.6, 120.1, 67.2, 43.3, 41.8, 25.9, 23.7, 17.0. HRMS (ESI-TOF) *m/z*: [M + Na] $^+$  calcd for  $\text{C}_{24}\text{H}_{25}\text{N}_3\text{NaOS}$ , 426.1611; found, 426.1613.

**methyl 2-(cyanomethyl)-5-((methyl(oxo)(phenyl)-sulfaneylidene)amino)-5,5-diphenylpentanoate (4p)**

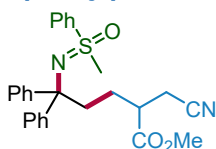

Purified by flash chromatography (silica gel, petroleum ether/ethyl acetate from 20:1 to 5:1, v/v) to give the desired product: colorless oil (30.8 mg, 67%),  $^1\text{H}$  NMR (400 MHz, Chloroform-*d*)  $\delta$  7.76 – 7.66 (m, 2H), 7.46 – 7.40 (m, 3H), 7.37 – 7.26 (m, 4H), 7.23 – 7.17 (m, 3H), 7.08 – 6.98 (m, 3H), 3.69 (d, *J* = 1.8 Hz, 3H), 2.76 – 2.44 (m, 8H), 1.71 – 1.63 (m, 2H).  $^{13}\text{C}$  NMR (101 MHz, Chloroform-*d*)  $\delta$  173.4, 173.3, 147.84, 147.79, 146.9, 146.8, 142.9, 142.8, 131.8, 131.7, 128.71, 128.67, 128.3, 128.0, 127.9, 127.7, 127.63, 127.60, 127.5, 127.4, 127.10, 127.08, 126.7, 126.6, 126.2, 125.9, 118.3, 67.0, 66.9, 52.2, 46.7, 46.6, 41.9, 41.8, 39.2, 39.1, 26.6, 26.5, 19.13, 19.11. HRMS (ESI-TOF) *m/z*: [M + Na] $^+$  calcd for  $\text{C}_{27}\text{H}_{28}\text{N}_2\text{NaO}_3\text{S}$ , 483.1713; found, 483.1719.

**ethyl 2-(cyanomethyl)-5-((methyl(oxo)(phenyl)-sulfaneylidene)amino)-5,5-diphenylpentanoate (4q)**

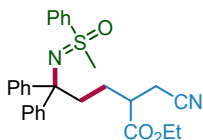

Purified by flash chromatography (silica gel, petroleum ether/ethyl acetate from 20:1 to 5:1, v/v) to give the desired product: colorless oil (33.2 mg, 70%),  $^1\text{H}$  NMR (400 MHz, Chloroform-*d*)  $\delta$  7.85 – 7.60 (m, 2H), 7.48 – 7.39 (m, 3H), 7.39 – 7.31 (m, 2H), 7.30 – 7.16 (m, 5H), 7.09 – 6.96 (m, 3H), 4.26 – 4.03 (m, 2H), 2.83 – 2.34 (m, 8H), 1.77 – 1.53 (m, 2H), 1.31 – 1.09 (m, 3H).  $^{13}\text{C}$  NMR (101

MHz, Chloroform-*d*)  $\delta$  172.9, 172.8, 147.9, 147.8, 146.90, 146.86, 142.9, 142.8, 131.8, 131.7, 128.72, 128.69, 128.0, 127.9, 127.7, 127.64, 127.62, 127.5, 127.4, 127.1, 126.64, 126.60, 126.2, 118.4, 66.99, 66.95, 61.1, 46.7, 46.6, 41.91, 41.87, 39.12, 39.08, 26.58, 26.56, 19.1, 14.2. HRMS (ESI-TOF)  $m/z$ :  $[M + Na]^+$  calcd for  $C_{28}H_{30}N_2NaO_3S$ , 497.1869; found, 497.1873.

***tert*-butyl 2-(cyanomethyl)-5-((methyl(oxo)(phenyl)-*l*6-sulfaneylidene)amino)-5,5-diphenylpentanoate (4r)**

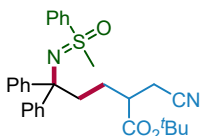

Purified by flash chromatography (silica gel, petroleum ether/ethyl acetate from 20:1 to 5:1, v/v) to give the desired product: colorless oil (40.2 mg, 80%),  $^1H$  NMR (400 MHz, Chloroform-*d*)  $\delta$  7.75 – 7.68 (m, 2H), 7.47 – 7.39 (m, 3H), 7.39 – 7.30 (m, 2H), 7.29 – 7.19 (m, 5H), 7.08 – 6.98 (m, 3H), 2.64 – 2.59 (m, 4H), 2.55 – 2.41 (m, 3H), 1.97 – 1.77 (m, 1H), 1.68 – 1.55 (m, 2H), 1.42 (d,  $J = 2.1$  Hz, 9H).  $^{13}C$  NMR (101 MHz, Chloroform-*d*)  $\delta$  172.03, 172.02, 147.94, 147.89, 147.0, 146.9, 143.0, 142.8, 132.2, 132.1, 131.73, 131.65, 128.69, 128.66, 128.0, 127.9, 127.72, 127.67, 127.6, 127.5, 127.4, 127.1, 126.6, 126.5, 126.2, 118.5, 81.6, 67.04, 67.01, 46.8, 46.6, 42.71, 42.65, 39.2, 39.1, 28.0, 26.6, 19.24, 19.20. HRMS (ESI-TOF)  $m/z$ :  $[M + Na]^+$  calcd for  $C_{30}H_{34}N_2NaO_3S$ , 525.2182; found, 525.2183.

**6-((methyl(oxo)(phenyl)-*l*6-sulfaneylidene)amino)-3,6,6-triphenylhexanenitrile (4s)**

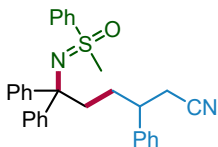

Purified by flash chromatography (silica gel, petroleum ether/ethyl acetate from 20:1 to 5:1, v/v) to give the desired product: colorless oil (24.9 mg, 52%),  $^1H$  NMR (400 MHz, Chloroform-*d*)  $\delta$  7.85 – 7.79 (m, 1H), 7.60 – 7.54 (m, 1H), 7.51 – 7.44 (m, 1H), 7.44 – 7.34 (m, 3H), 7.34 – 7.18 (m, 8H), 7.17 – 7.03 (m, 5H), 7.00 – 6.92 (m, 1H), 2.94 – 2.79 (m, 1H), 2.75 – 2.36 (m, 6H), 2.33 – 2.16 (m, 1H), 1.98 – 1.83 (m, 1H), 1.71 – 1.45 (m, 1H).  $^{13}C$  NMR (101 MHz, Chloroform-*d*)  $\delta$  148.1, 148.0, 147.7, 146.9, 143.2, 142.8, 142.0, 141.9, 132.0, 131.5, 128.9, 128.7, 128.6, 128.0, 127.9, 127.79, 127.76, 127.7, 127.52, 127.49, 127.47, 127.45, 127.4, 127.2, 127.1, 126.7, 126.4, 126.14, 126.07, 118.8, 67.2, 67.1, 47.1, 46.2, 42.63, 42.56, 40.3, 40.2, 29.6, 29.5, 25.4. HRMS (ESI-TOF)  $m/z$ :  $[M + Na]^+$  calcd for  $C_{31}H_{30}N_2NaOS$ , 501.1971; found, 501.1976.

**4-((methyl(oxo)(phenyl)-sulfaneylidene)amino)-4,4-diphenylbutan-2-yl)oxypropanenitrile**

(4t)

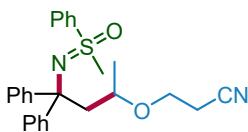

Purified by flash chromatography (silica gel, petroleum ether/ethyl acetate from 20:1 to 5:1, v/v) to give the desired product: colorless oil (23.3 mg, 54%),  $^1\text{H}$  NMR (400 MHz, Chloroform-*d*)  $\delta$  7.96 – 7.86 (m, 1H), 7.61 – 7.35 (m, 6H), 7.32 – 7.08 (m, 7H), 6.97 – 6.91 (m, 1H), 3.77 – 3.60 (m, 1H), 3.48 – 3.27 (m, 1H), 3.17 – 2.88 (m, 1H), 2.83 – 2.31 (m, 5H), 2.12 – 1.82 (m, 2H), 1.06 (dd,  $J$  = 23.1, 6.2 Hz, 3H).  $^{13}\text{C}$  NMR (101 MHz, Chloroform-*d*)  $\delta$  148.4, 148.2, 146.7, 142.7, 132.1, 131.5, 128.9, 128.6, 128.14, 128.11, 128.04, 127.96, 127.7, 127.5, 127.3, 127.2, 127.13, 127.06, 126.8, 126.2, 125.8, 118.1, 73.6, 73.4, 66.34, 66.28, 62.7, 62.6, 49.9, 49.8, 47.3, 45.9, 21.3, 20.9, 18.5, 18.4. HRMS (ESI-TOF)  $m/z$ :  $[\text{M} + \text{Na}]^+$  calcd for  $\text{C}_{26}\text{H}_{28}\text{N}_2\text{NaO}_2\text{S}$ , 455.1764; found, 455.1766.

**5,5-dimethyl-7-((methyl(oxo)(phenyl)-sulfaneylidene)amino)-7,7-diphenylheptanenitrile (4u)**

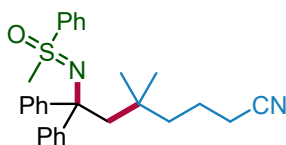

Purified by flash chromatography (silica gel, petroleum ether/ethyl acetate from 20:1 to 5:1, v/v) to give the desired product: colorless oil (20.4 mg, 46%),  $^1\text{H}$  NMR (400 MHz, Chloroform-*d*)  $\delta$  7.71 – 7.65 (m, 2H), 7.47 – 7.37 (m, 3H), 7.37 – 7.14 (m, 7H), 7.06 – 6.94 (m, 3H), 2.68 – 2.56 (m, 2H), 2.53 (s, 3H), 2.09 – 1.96 (m, 2H), 1.66 – 1.49 (m, 2H), 1.27 – 1.10 (m, 2H), 0.76 (s, 3H), 0.72 (s, 3H).  $^{13}\text{C}$  NMR (101 MHz, Chloroform-*d*)  $\delta$  149.1, 148.0, 143.6, 131.4, 128.6, 128.43, 128.36, 127.6, 127.0, 126.9, 126.4, 126.0, 120.1, 66.8, 51.4, 46.9, 43.2, 34.4, 29.1, 28.9, 20.5, 17.7. HRMS (ESI-TOF)  $m/z$ :  $[\text{M} + \text{Na}]^+$  calcd for  $\text{C}_{28}\text{H}_{32}\text{N}_2\text{NaOS}$ , 467.2128; found, 467.2129.

**6,6-bis(4-chlorophenyl)-6-((methyl(oxo)(phenyl)-sulfaneylidene)amino)hexanenitrile (4v)**

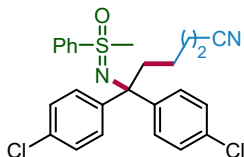

Purified by flash chromatography (silica gel, petroleum ether/ethyl acetate from 20:1 to 5:1, v/v) to give the desired product: colorless oil (39.5 mg, 84%),  $^1\text{H}$  NMR (400 MHz, Chloroform-*d*)  $\delta$  7.60 – 7.54 (m, 2H), 7.47 – 7.42 (m, 1H), 7.36 – 7.30 (m, 4H), 7.25 – 7.20 (m, 2H), 7.07 – 7.01 (m, 2H), 6.95 – 6.87 (m, 2H), 2.83 (s, 3H), 2.58 – 2.46 (m, 1H), 2.34 – 2.22 (m, 3H), 1.66 – 1.63 (m, 2H), 1.50 – 1.41 (m, 1H), 1.30 – 1.23 (m, 1H).  $^{13}\text{C}$  NMR (101 MHz, Chloroform-*d*)  $\delta$  146.5, 145.1, 142.4, 132.3, 132.1, 131.7, 129.3, 129.0, 128.7, 128.0, 127.4, 127.1, 120.0, 66.6, 47.1, 41.7, 25.7, 23.6,

17.0. HRMS (ESI-TOF)  $m/z$ :  $[M + Na]^+$  calcd for  $C_{25}H_{24}Cl_2N_2NaOS$ , 493.0879; found, 493.0881.

**6,6-bis(4-bromophenyl)-6-((methyl(oxo)(phenyl)-sulfaneylidene)amino)hexanenitrile (4w)**

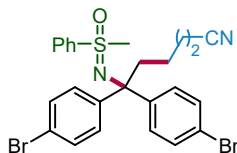

Purified by flash chromatography (silica gel, petroleum ether/ethyl acetate from 20:1 to 5:1, v/v) to give the desired product: colorless oil (45.8 mg, 82%),  $^1H$  NMR (400 MHz, Chloroform- $d$ )  $\delta$  7.57 – 7.52 (m, 2H), 7.48 – 7.43 (m, 1H), 7.40 – 7.36 (m, 2H), 7.34 – 7.26 (m, 4H), 7.08 – 7.03 (m, 2H), 6.97 (d,  $J$  = 8.6 Hz, 2H), 2.85 (s, 3H), 2.58 – 2.46 (m, 1H), 2.34 – 2.20 (m, 3H), 1.68 – 1.63 (m, 2H), 1.52 – 1.43 (m, 1H), 1.29 – 1.21 (m, 1H).  $^{13}C$  NMR (101 MHz, Chloroform- $d$ )  $\delta$  146.9, 145.5, 142.3, 131.7, 130.9, 130.4, 129.7, 129.4, 128.7, 127.1, 120.5, 120.4, 120.0, 66.7, 47.1, 41.6, 25.7, 23.5, 17.0. HRMS (ESI-TOF)  $m/z$ :  $[M + Na]^+$  calcd for  $C_{25}H_{24}Br_2N_2NaOS$ , 580.9868; found, 580.9875.

**6-((methyl(oxo)(phenyl)-sulfaneylidene)amino)-6,6-di-*p*-tolylhexanenitrile (4x)**

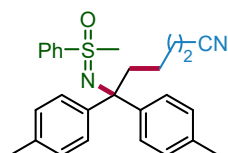

Purified by flash chromatography (silica gel, petroleum ether/ethyl acetate from 20:1 to 5:1, v/v) to give the desired product: colorless oil (36.6 mg, 85%),  $^1H$  NMR (400 MHz, Chloroform- $d$ )  $\delta$  7.80 – 7.67 (m, 2H), 7.47 – 7.43 (m, 1H), 7.38 – 7.30 (m, 4H), 7.13 – 7.05 (m, 4H), 6.87 – 6.82 (m, 2H), 2.58 (s, 3H), 2.53 – 2.38 (m, 2H), 2.31 (s, 3H), 2.30 – 2.23 (m, 2H), 2.20 (s, 3H), 1.65 – 1.62 (m, 2H), 1.43 – 1.28 (m, 2H).  $^{13}C$  NMR (101 MHz, Chloroform- $d$ )  $\delta$  145.4, 144.7, 143.2, 135.9, 135.4, 131.5, 128.5, 128.0, 127.6, 127.6, 127.2, 120.2, 66.9, 46.5, 41.9, 25.9, 23.8, 21.0, 20.9, 17.0. HRMS (ESI-TOF)  $m/z$ :  $[M + Na]^+$  calcd for  $C_{27}H_{30}N_2NaOS$ , 453.1971; found, 453.1972.

**6-(4-chlorophenyl)-6-((methyl(oxo)(phenyl)-sulfaneylidene)amino)-6-phenylhexanenitrile (4y)**

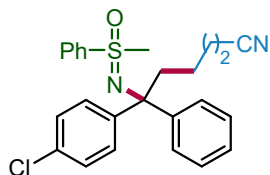

Purified by flash chromatography (silica gel, petroleum ether/ethyl acetate from 20:1 to 5:1, v/v) to give the desired product: colorless oil (32.7 mg, 75%),  $^1H$  NMR (400 MHz, Chloroform- $d$ )  $\delta$  7.69 – 7.62 (m, 2H), 7.49 – 7.25 (m, 7H), 7.23 – 7.11 (m, 3H), 7.03 – 6.95 (m, 2H), 2.70 (d,  $J$  = 28.5 Hz, 3H), 2.57 – 2.47 (m, 1H), 2.43 – 2.32 (m, 1H), 2.31 – 2.25 (m, 2H), 1.67 – 1.60 (m, 2H), 1.39 – 1.28

(m, 2H).  $^{13}\text{C}$  NMR (101 MHz, Chloroform-*d*)  $\delta$  147.8, 147.0, 146.6, 146.0, 142.8, 142.6, 132.1, 131.8, 131.74, 131.68, 129.2, 129.1, 128.70, 128.67, 128.3, 128.0, 127.9, 127.7, 127.6, 127.5, 127.4, 127.13, 127.10, 126.7, 126.3, 120.0, 66.93, 66.90, 47.1, 46.6, 41.8, 41.7, 25.8, 23.7, 23.6, 17.0. HRMS (ESI-TOF)  $m/z$ :  $[\text{M} + \text{Na}]^+$  calcd for  $\text{C}_{25}\text{H}_{25}\text{ClN}_2\text{NaOS}$ , 459.1268; found, 459.1270.

**6-((methyl(oxo)(phenyl)-sulfaneylidene)amino)-6-phenyl-6-(*p*-tolyl)hexanenitrile (4z)**

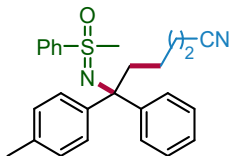

Purified by flash chromatography (silica gel, petroleum ether/ethyl acetate from 20:1 to 5:1, v/v) to give the desired product: colorless oil (35.4 mg, 85%),  $^1\text{H}$  NMR (400 MHz, Chloroform-*d*)  $\delta$  7.80 – 7.75 (m, 1H), 7.73 – 7.69 (m, 1H), 7.48 – 7.30 (m, 5H), 7.29 – 7.25 (m, 2H), 7.22 – 7.00 (m, 4H), 6.86 – 6.80 (m, 1H), 2.58 (d,  $J = 23.8$  Hz, 3H), 2.52 – 2.36 (m, 2H), 2.33 – 2.18 (m, 5H), 1.67 – 1.60 (m, 2H), 1.47 – 1.25 (m, 2H).  $^{13}\text{C}$  NMR (101 MHz, Chloroform-*d*)  $\delta$  148.4, 147.7, 145.3, 144.4, 143.14, 143.10, 136.1, 135.5, 131.7, 131.5, 128.7, 128.6, 128.5, 128.0, 127.9, 127.7, 127.6, 127.4, 127.2, 127.1, 126.4, 126.0, 120.1, 67.09, 67.07, 46.6, 46.5, 41.83, 41.80, 25.9, 23.7, 21.0, 20.9, 17.0. HRMS (ESI-TOF)  $m/z$ :  $[\text{M} + \text{Na}]^+$  calcd for  $\text{C}_{26}\text{H}_{28}\text{N}_2\text{NaOS}$ , 439.1815; found, 439.1817.

**6-(3-chlorophenyl)-6-((methyl(oxo)(phenyl)-sulfaneylidene)amino)-6-phenylhexanenitrile (4aa)**

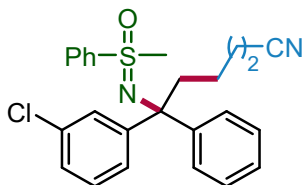

Purified by flash chromatography (silica gel, petroleum ether/ethyl acetate from 20:1 to 5:1, v/v) to give the desired product: colorless oil (27.0 mg, 62%),  $^1\text{H}$  NMR (400 MHz, Chloroform-*d*)  $\delta$  7.74 – 7.67 (m, 1H), 7.64 – 7.59 (m, 1H), 7.55 – 7.35 (m, 4H), 7.34 – 7.26 (m, 2H), 7.24 – 7.07 (m, 4H), 7.03 – 6.93 (m, 2H), 2.72 (d,  $J = 51.8$  Hz, 3H), 2.61 – 2.21 (m, 4H), 1.69 – 1.62 (m, 2H), 1.40 – 1.25 (m, 2H).  $^{13}\text{C}$  NMR (101 MHz, Chloroform-*d*)  $\delta$  150.7, 149.5, 147.6, 146.2, 142.4, 133.8, 133.4, 131.9, 131.6, 129.1, 128.74, 128.72, 128.65, 128.2, 128.0, 127.82, 127.75, 127.54, 127.46, 127.1, 127.0, 126.7, 126.5, 126.3, 126.2, 125.9, 125.7, 120.0, 67.1, 47.2, 46.7, 41.7, 41.5, 25.8, 23.59, 23.57, 16.98, 16.97. HRMS (ESI-TOF)  $m/z$ :  $[\text{M} + \text{Na}]^+$  calcd for  $\text{C}_{25}\text{H}_{25}\text{ClN}_2\text{NaOS}$ , 459.1268; found, 459.1270.

**6-((methyl(oxo)(phenyl)-sulfaneylidene)amino)-6-phenyl-6-(*m*-tolyl)hexanenitrile (4ab)**

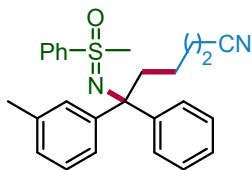

Purified by flash chromatography (silica gel, petroleum ether/ethyl acetate from 20:1 to 5:1, v/v) to give the desired product: white oil (21.6 mg, 52%),  $^1\text{H}$  NMR (400 MHz, Chloroform-*d*)  $\delta$  7.80 – 7.67 (m, 2H), 7.49 – 7.32 (m, 4H), 7.30 – 7.13 (m, 4H), 7.11 – 6.76 (m, 4H), 2.60 (d,  $J$  = 25.4 Hz, 3H), 2.55 – 2.35 (m, 2H), 2.35 – 2.10 (m, 5H), 1.69 – 1.58 (m, 2H), 1.49 – 1.23 (m, 2H).  $^{13}\text{C}$  NMR (101 MHz, Chloroform-*d*)  $\delta$  148.4, 148.1, 147.6, 147.1, 143.1, 142.9, 137.3, 136.7, 131.7, 131.6, 128.7, 128.6, 128.5, 128.3, 127.83, 127.79, 127.7, 127.6, 127.4, 127.31, 127.26, 127.14, 127.13, 126.8, 126.4, 126.0, 125.1, 124.8, 120.1, 67.28, 67.25, 46.8, 46.5, 41.8, 41.7, 25.9, 23.7, 21.7, 21.5, 17.0. HRMS (ESI-TOF)  $m/z$ :  $[\text{M} + \text{Na}]^+$  calcd for  $\text{C}_{26}\text{H}_{28}\text{N}_2\text{NaOS}$ , 439.1815; found, 439.1816.

**6-(3,4-dimethylphenyl)-6-((methyl(oxo)(phenyl)sulfaneylidene)amino)-6-phenylhexanenitrile (4ac)**

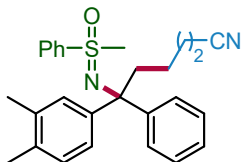

Purified by flash chromatography (silica gel, petroleum ether/ethyl acetate from 20:1 to 5:1, v/v) to give the desired product: colorless oil (26.2 mg, 61%),  $^1\text{H}$  NMR (400 MHz, Chloroform-*d*)  $\delta$  7.81 – 7.73 (m, 1H), 7.69 – 7.61 (m, 1H), 7.49 – 7.35 (m, 3H), 7.33 – 7.25 (m, 3H), 7.21 – 6.94 (m, 4H), 6.86 – 6.74 (m, 1H), 2.71 – 2.40 (m, 5H), 2.39 – 2.24 (m, 2H), 2.21 (d,  $J$  = 3.2 Hz, 3H), 2.03 (d,  $J$  = 28.5 Hz, 3H), 1.71 – 1.58 (m, 2H), 1.51 – 1.39 (m, 1H), 1.35 – 1.18 (m, 1H).  $^{13}\text{C}$  NMR (101 MHz, Chloroform-*d*)  $\delta$  148.5, 147.8, 145.6, 144.5, 143.2, 143.0, 135.8, 135.0, 134.7, 134.1, 131.7, 131.2, 129.4, 129.2, 128.9, 128.7, 128.6, 128.3, 127.8, 127.60, 127.55, 127.4, 127.23, 127.16, 126.2, 125.9, 125.3, 125.1, 120.2, 67.09, 67.05, 46.8, 46.4, 41.9, 41.7, 26.0, 25.9, 23.7, 20.0, 19.9, 19.4, 19.2, 17.0. HRMS (ESI-TOF)  $m/z$ :  $[\text{M} + \text{Na}]^+$  calcd for  $\text{C}_{27}\text{H}_{30}\text{N}_2\text{NaOS}$ , 453.1971; found, 453.1972.

**6-(1-methyl-1H-indol-3-yl)-6,6-diphenylhexanenitrile (4ad)**

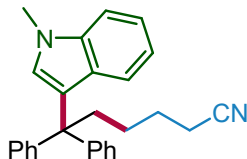

Purified by flash chromatography (silica gel, petroleum ether/ethyl acetate from 30:1 to 20:1, v/v) to give the desired product: white oil (21.5 mg, 57%),  $^1\text{H}$  NMR (400 MHz, Chloroform-*d*)  $\delta$  7.38 –

7.30 (m, 4H), 7.28 – 7.19 (m, 5H), 7.18 – 7.10 (m, 3H), 7.08 – 7.02 (m, 1H), 6.91 – 6.83 (m, 1H), 6.65 (s, 1H), 3.67 (s, 3H), 2.72 – 2.59 (m, 2H), 2.10 (t,  $J = 7.2$  Hz, 2H), 1.65 – 1.50 (m, 2H), 1.33 – 1.18 (m, 2H).  $^{13}\text{C}$  NMR (101 MHz, Chloroform- $d$ )  $\delta$  147.1, 137.7, 129.0, 128.6, 128.0, 127.0, 125.9, 122.2, 121.4, 120.6, 119.8, 118.6, 109.4, 52.1, 39.5, 32.8, 26.2, 25.5, 17.0. HRMS (ESI-TOF)  $m/z$ :  $[\text{M} + \text{Na}]^+$  calcd for  $\text{C}_{27}\text{H}_{26}\text{N}_2\text{Na}$ , 401.1988; found, 401.1992.

#### 6-(1H-indol-3-yl)-6,6-diphenylhexanenitrile (4ae)

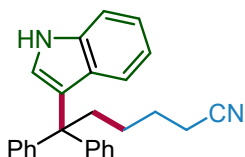

Purified by flash chromatography (silica gel, petroleum ether/ethyl acetate from 20:1 to 10:1, v/v) to give the desired product: white oil (17.5 mg, 48%),  $^1\text{H}$  NMR (400 MHz, Chloroform- $d$ )  $\delta$  7.98 (s, 1H), 7.37 – 7.30 (m, 5H), 7.26 – 7.20 (m, 4H), 7.19 – 7.03 (m, 4H), 6.93 – 6.85 (m, 1H), 6.83 – 6.78 (m, 1H), 2.74 – 2.60 (m, 2H), 2.22 – 2.07 (m, 2H), 1.66 – 1.53 (m, 2H), 1.34 – 1.19 (m, 2H).  $^{13}\text{C}$  NMR (101 MHz, Chloroform- $d$ )  $\delta$  146.9, 137.0, 128.5, 127.9, 126.5, 125.9, 124.2, 122.2, 122.1, 121.8, 119.1, 111.2, 52.1, 39.3, 26.1, 25.5, 17.0. HRMS (ESI-TOF)  $m/z$ :  $[\text{M} + \text{Na}]^+$  calcd for  $\text{C}_{26}\text{H}_{24}\text{N}_2\text{Na}$ , 387.1832; found, 387.1837.

#### ethyl 6,6-diphenylhex-5-enoate (5a)<sup>1</sup>

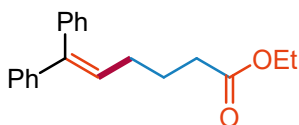

Purified by flash chromatography (silica gel, petroleum ether/ethyl acetate from 100:1 to 50:1, v/v) to give the desired product: white solid (22.9 mg, 78%),  $^1\text{H}$  NMR (400 MHz, Chloroform- $d$ )  $\delta$  7.4 – 7.3 (m, 2H), 7.3 – 7.2 (m, 6H), 7.2 – 7.1 (m, 2H), 6.1 (t,  $J = 7.4$  Hz, 1H), 4.1 (q,  $J = 7.1$  Hz, 2H), 2.3 (t,  $J = 7.5$  Hz, 2H), 2.2 (q,  $J = 7.4$  Hz, 2H), 1.8 – 1.7 (m, 2H), 1.2 (t,  $J = 7.1$  Hz, 3H).  $^{13}\text{C}$  NMR (101 MHz, Chloroform- $d$ )  $\delta$  173.5, 142.6, 142.5, 140.0, 129.9, 128.7, 128.2, 128.1, 127.2, 127.0, 60.3, 33.9, 29.2, 25.2, 14.2.

#### 6,6-diphenylhex-5-enoic acid (5b)<sup>1</sup>

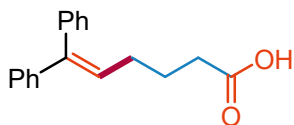

Purified by flash chromatography (silica gel, petroleum ether/ethyl acetate from 3:1 to 1:2, v/v) to give the desired product: white solid (86.5 mg, 65%),  $^1\text{H}$  NMR (400 MHz, Chloroform- $d$ )  $\delta$  10.95 (s, 1H), 7.38 – 7.31 (m, 2H), 7.31 – 7.13 (m, 8H), 6.04 (t,  $J = 7.4$  Hz, 1H), 2.44 – 2.26 (m, 2H),



2.23 – 2.09 (m, 2H), 1.88 – 1.69 (m, 2H).  $^{13}\text{C}$  NMR (101 MHz, Chloroform-*d*)  $\delta$  180.2, 142.8, 142.5, 140.0, 129.9, 128.4, 128.3, 128.2, 127.2, 127.0, 33.6, 29.1, 24.9.

**6,6-diphenylhex-5-enitrile (6)<sup>1</sup>**

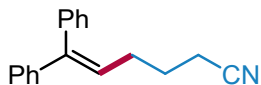

Purified by flash chromatography (silica gel, petroleum ether/ethyl acetate from 50:1 to 30:1, v/v) to give the desired product: colorless oil.  $^1\text{H}$  NMR (600 MHz, Chloroform-*d*)  $\delta$  7.41 – 7.36 (m, 2H), 7.35 – 7.30 (m, 1H), 7.28 – 7.25 (m, 2H), 7.25 – 7.20 (m, 3H), 7.18 – 7.13 (m, 2H), 6.01 (t,  $J$  = 7.4 Hz, 1H), 2.36 – 2.19 (m, 4H), 1.88 – 1.73 (m, 2H).  $^{13}\text{C}$  NMR (151 MHz, Chloroform-*d*)  $\delta$  143.8, 142.1, 139.6, 129.7, 128.4, 128.2, 127.3, 127.24, 127.18, 126.6, 119.5, 28.7, 25.8, 16.7.

## 5. NMR copies of product

7.758  
7.740  
7.737  
7.466  
7.462  
7.456  
7.453  
7.448  
7.444  
7.442  
7.437  
7.422  
7.419  
7.416  
7.376  
7.372  
7.360  
7.357  
7.339  
7.336  
7.286  
7.283  
7.265  
7.261  
7.256  
7.250  
7.246  
7.243  
7.239  
7.236  
7.206  
7.203  
7.199  
7.185  
7.083  
7.079  
7.062  
7.057  
7.047  
7.043  
7.028  
7.025  
7.021  
7.007  
2.566  
2.498  
2.494  
2.484  
2.481  
2.275  
2.256  
2.252  
2.236  
2.234  
2.215  
1.646  
1.643  
1.625  
1.606

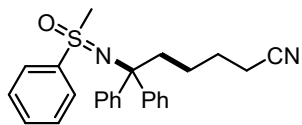

**4a**,  $^1\text{H}$  NMR, 400 MHz,  $\text{CDCl}_3$

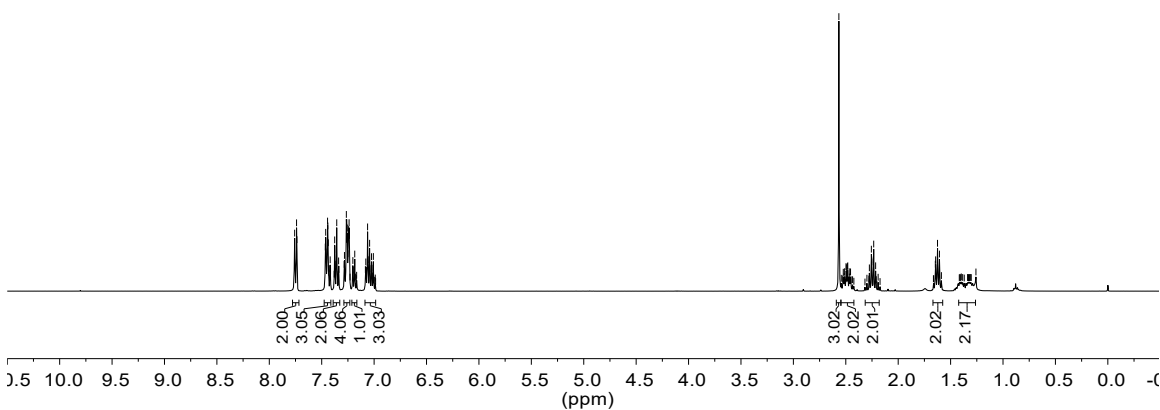

148.324  
147.476  
143.027  
131.753  
128.732  
127.936  
127.735  
127.653  
127.422  
127.142  
126.536  
126.060  
120.129  
-67.279  
-46.564  
-41.769  
25.912  
23.711  
16.971

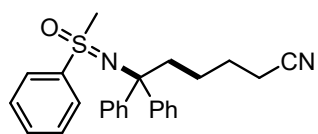

**4a**,  $^{13}\text{C}$  NMR, 101 MHz,  $\text{CDCl}_3$

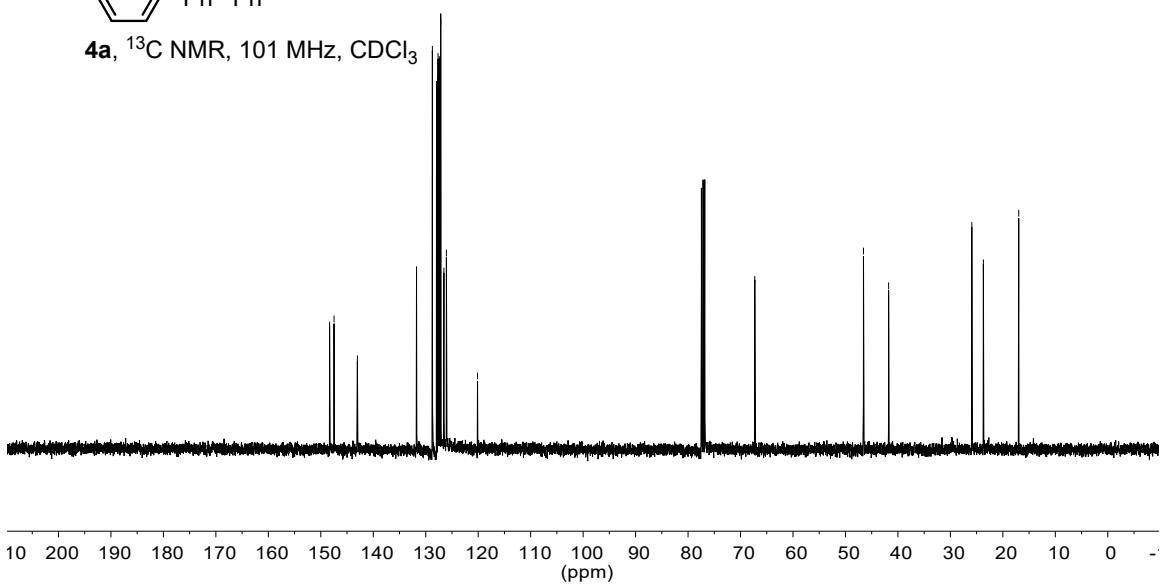

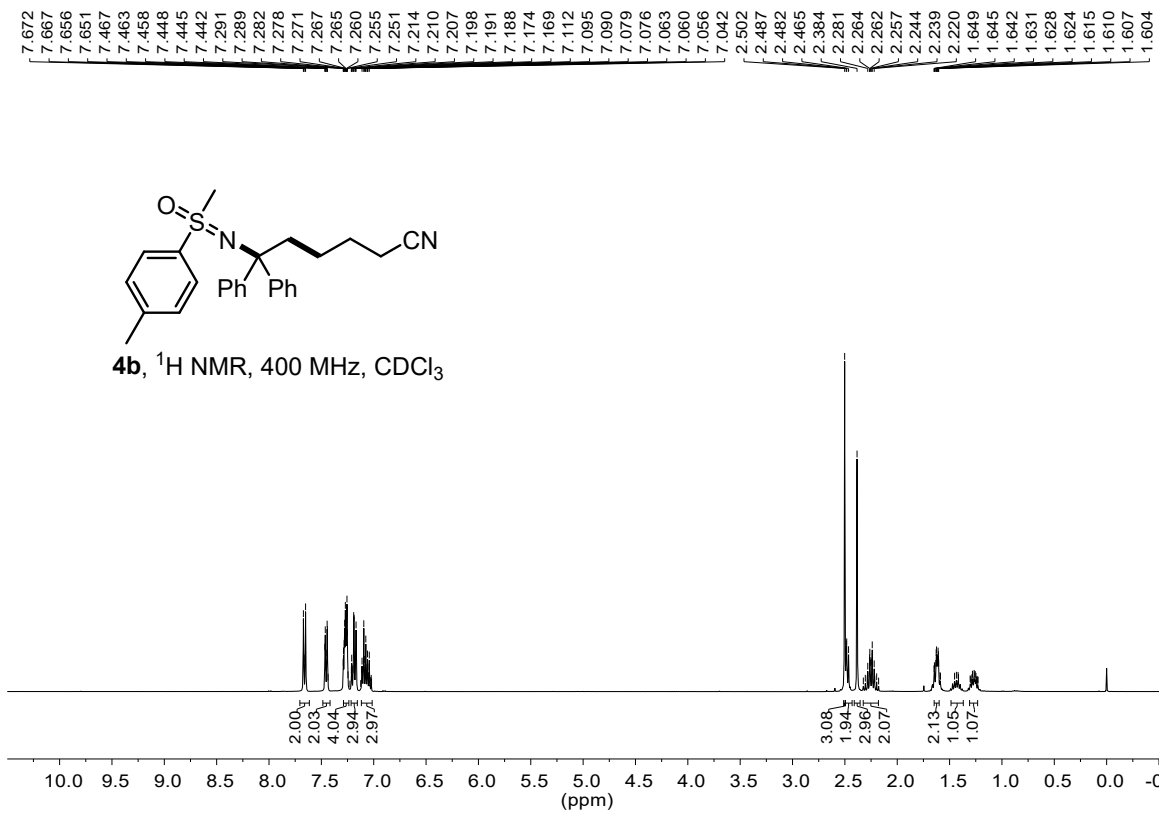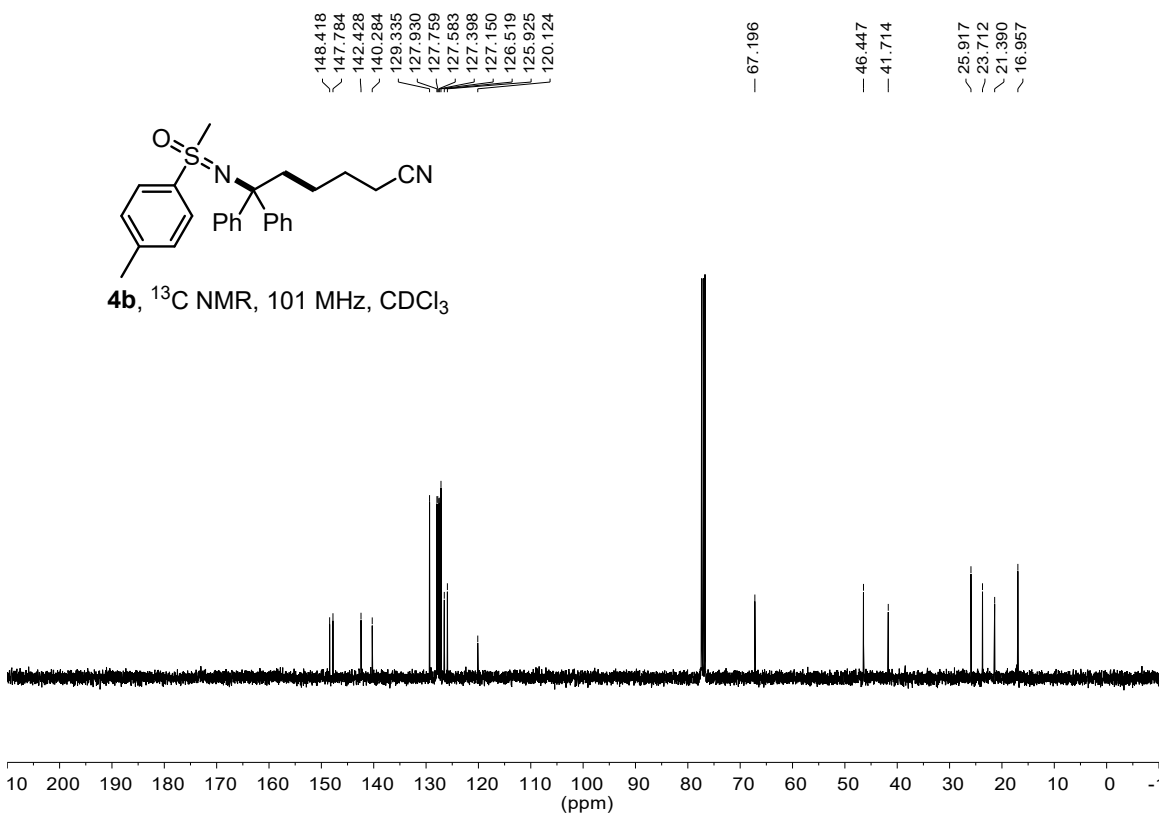

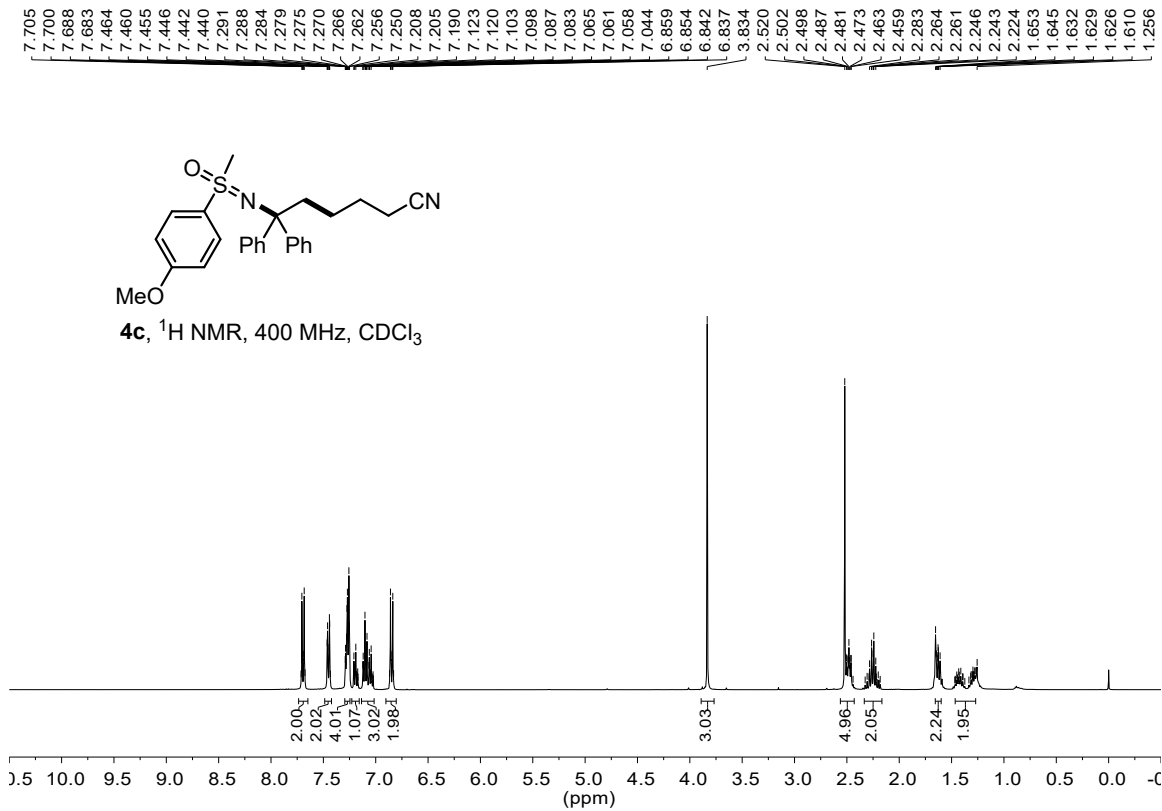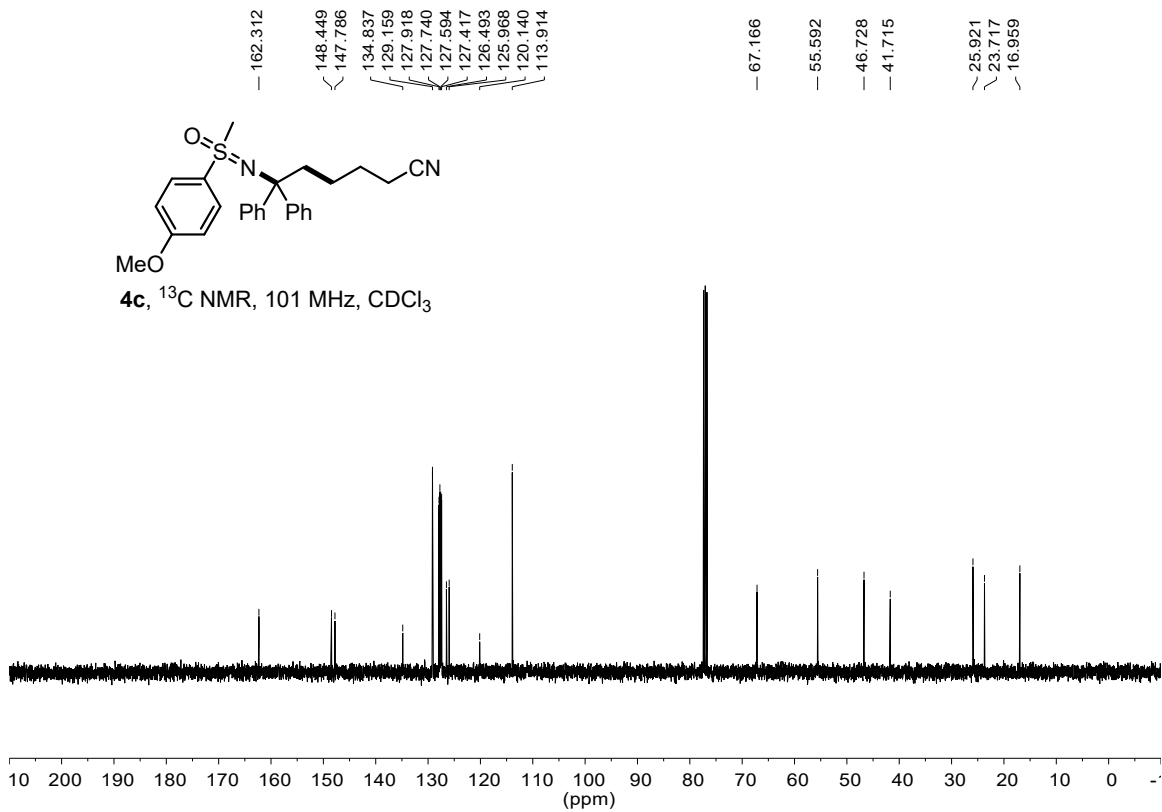

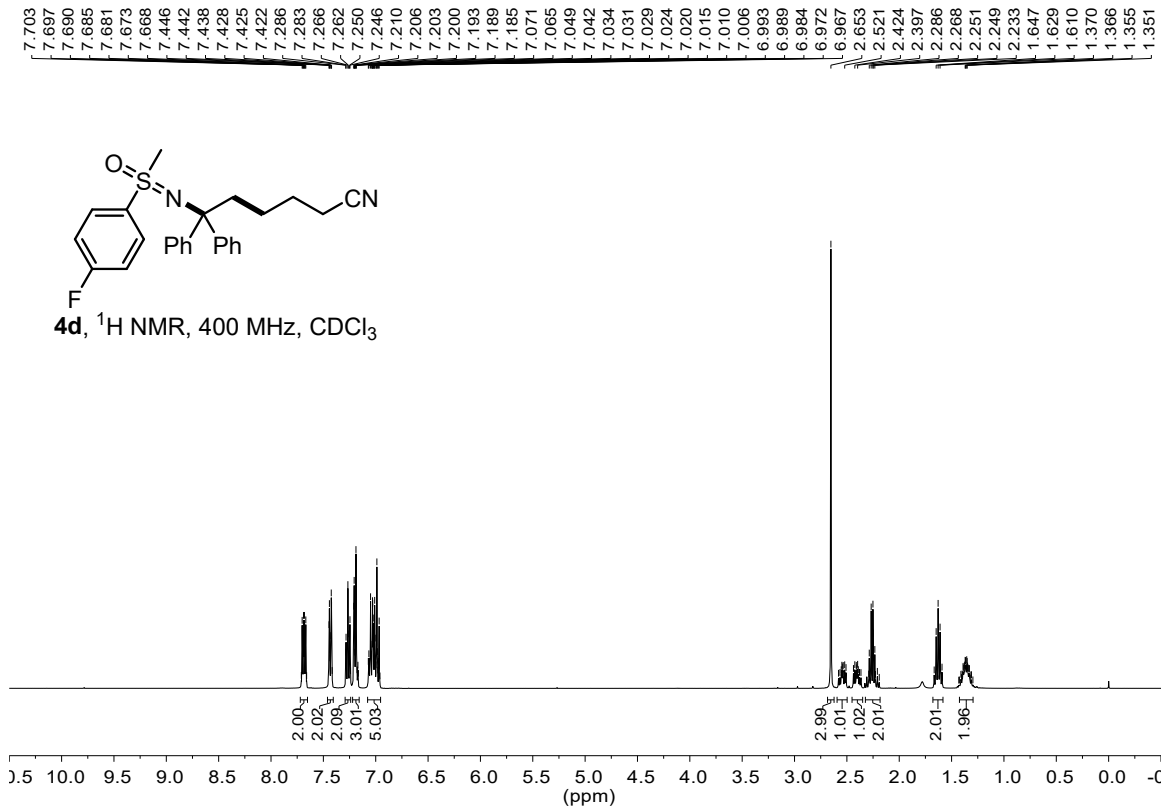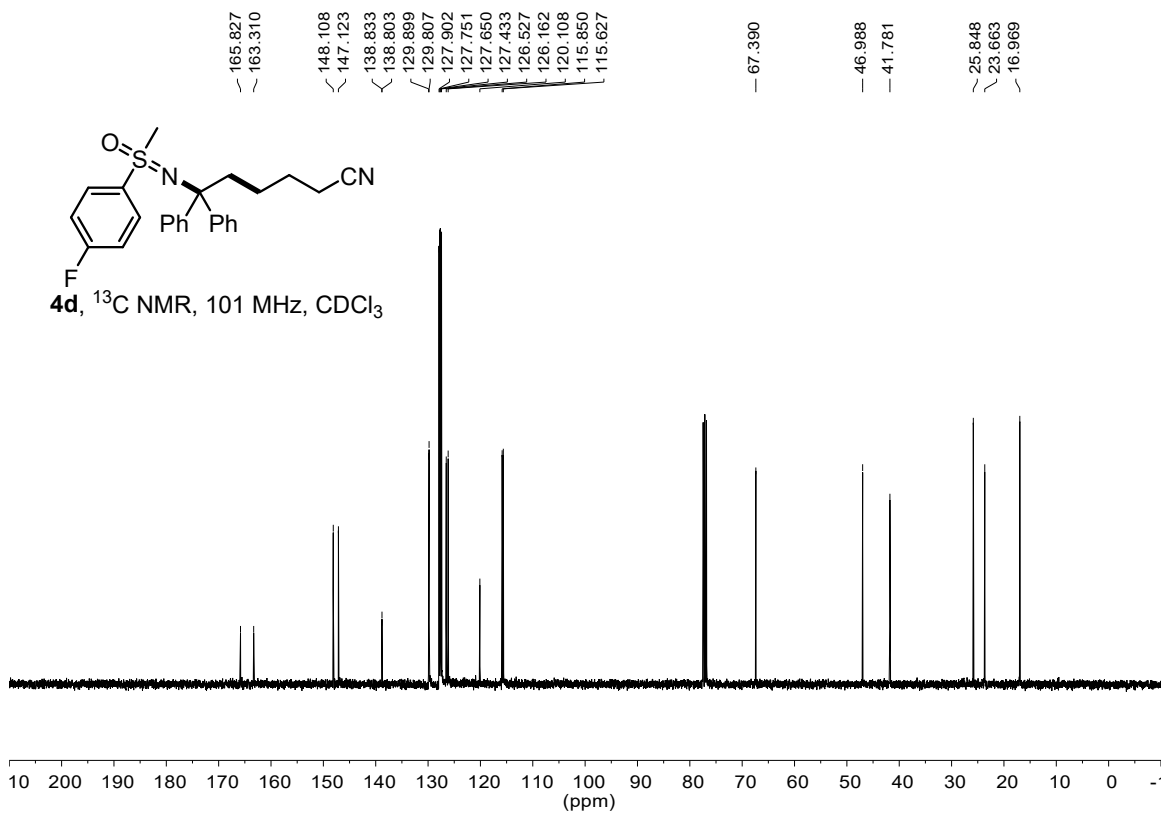

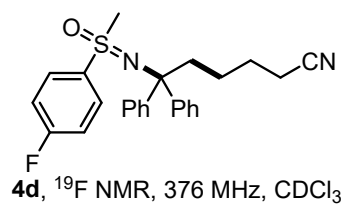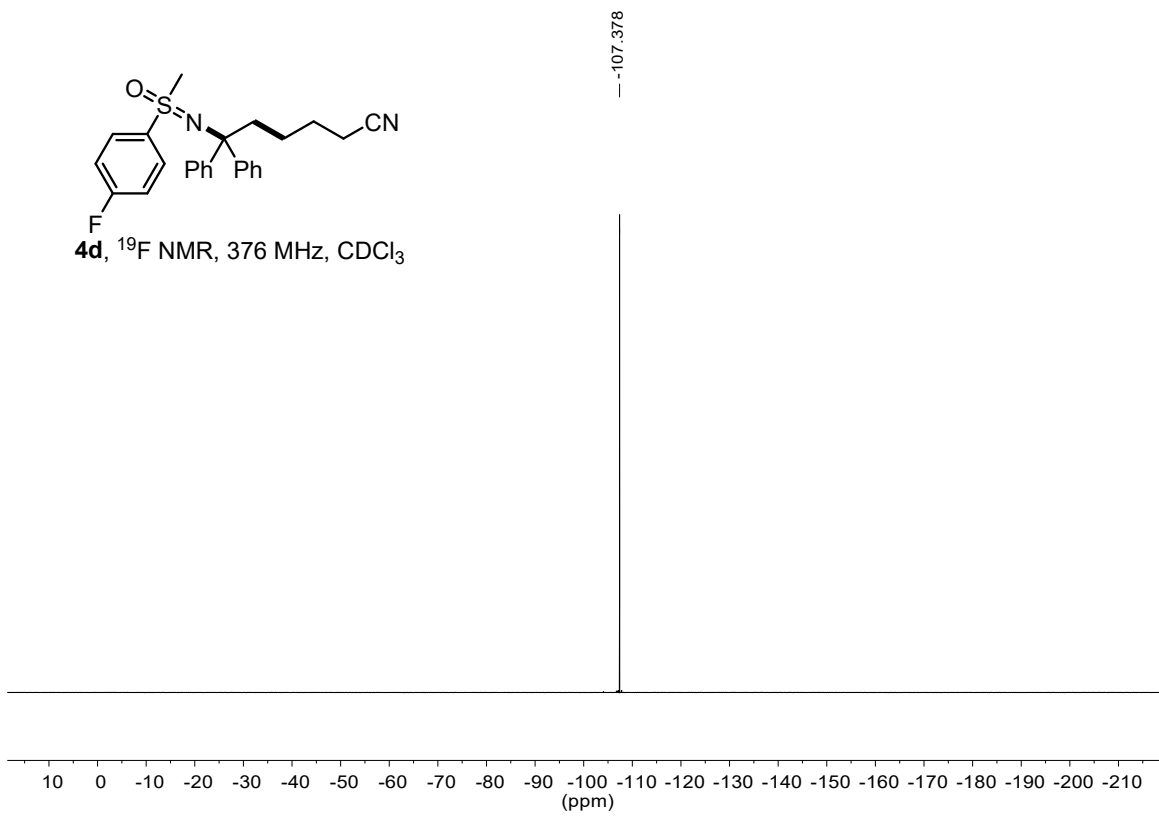

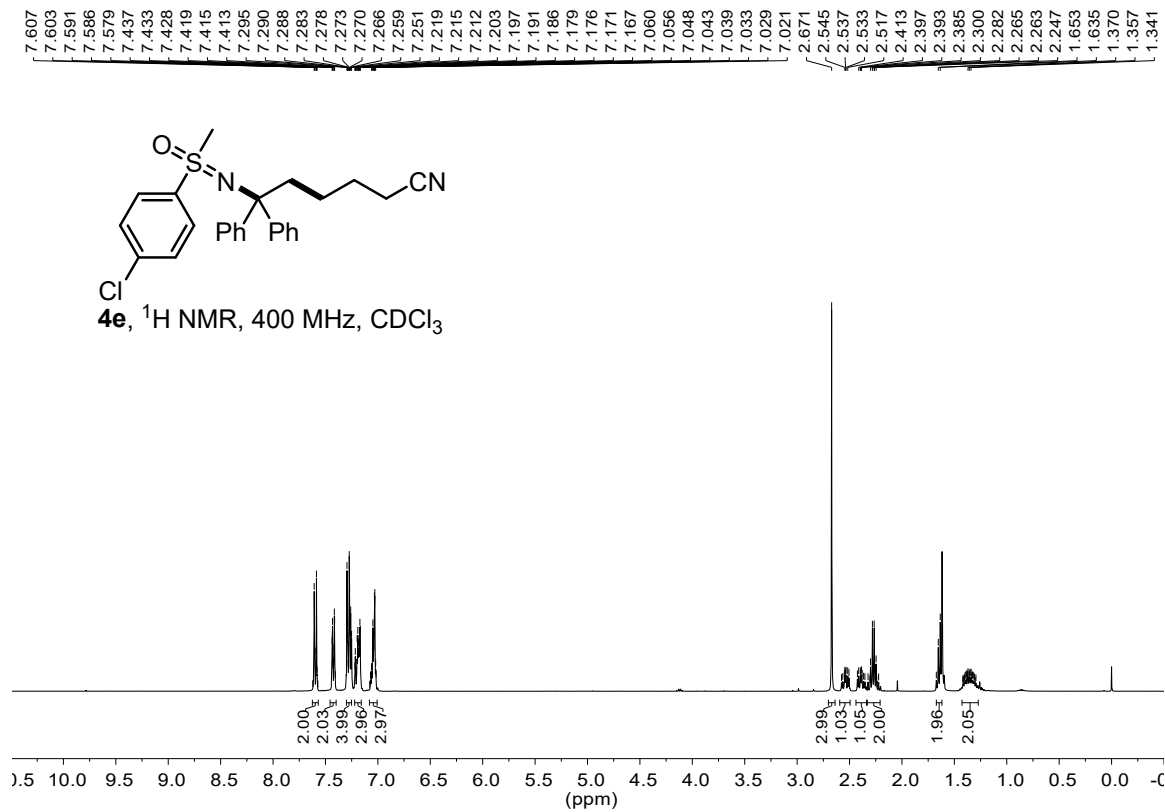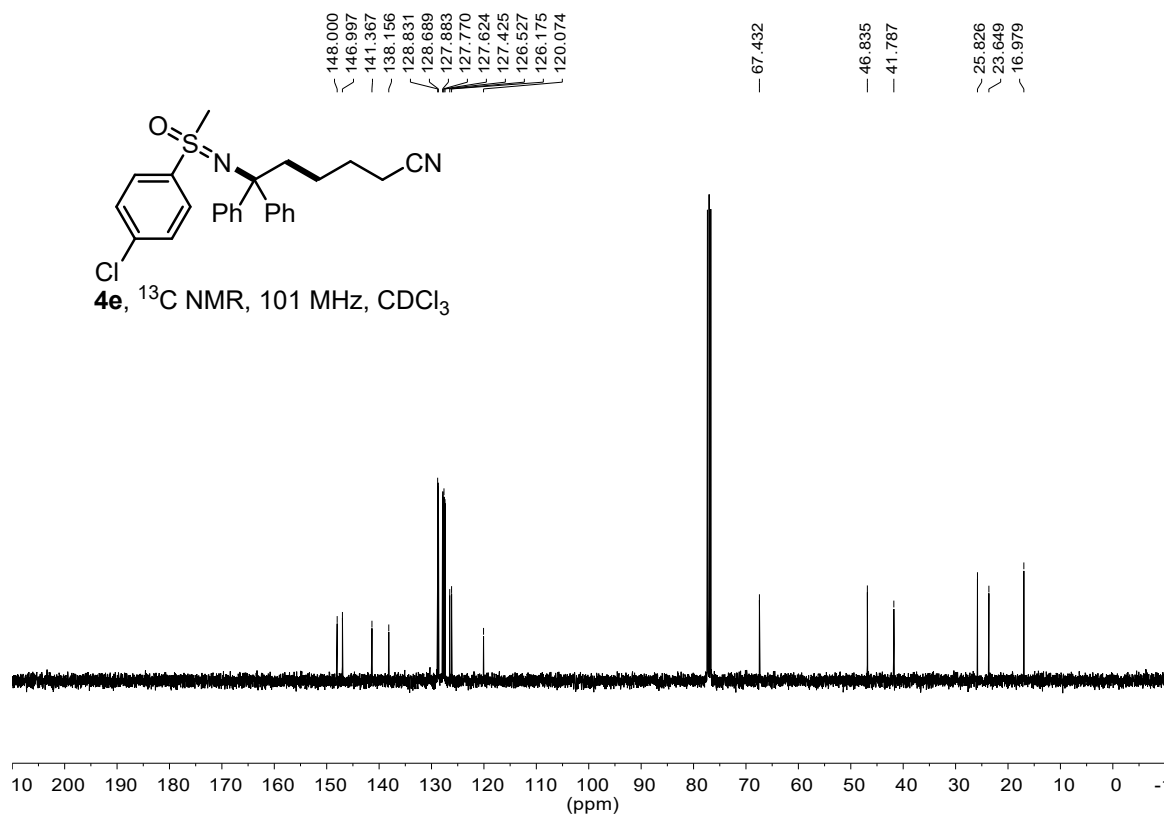

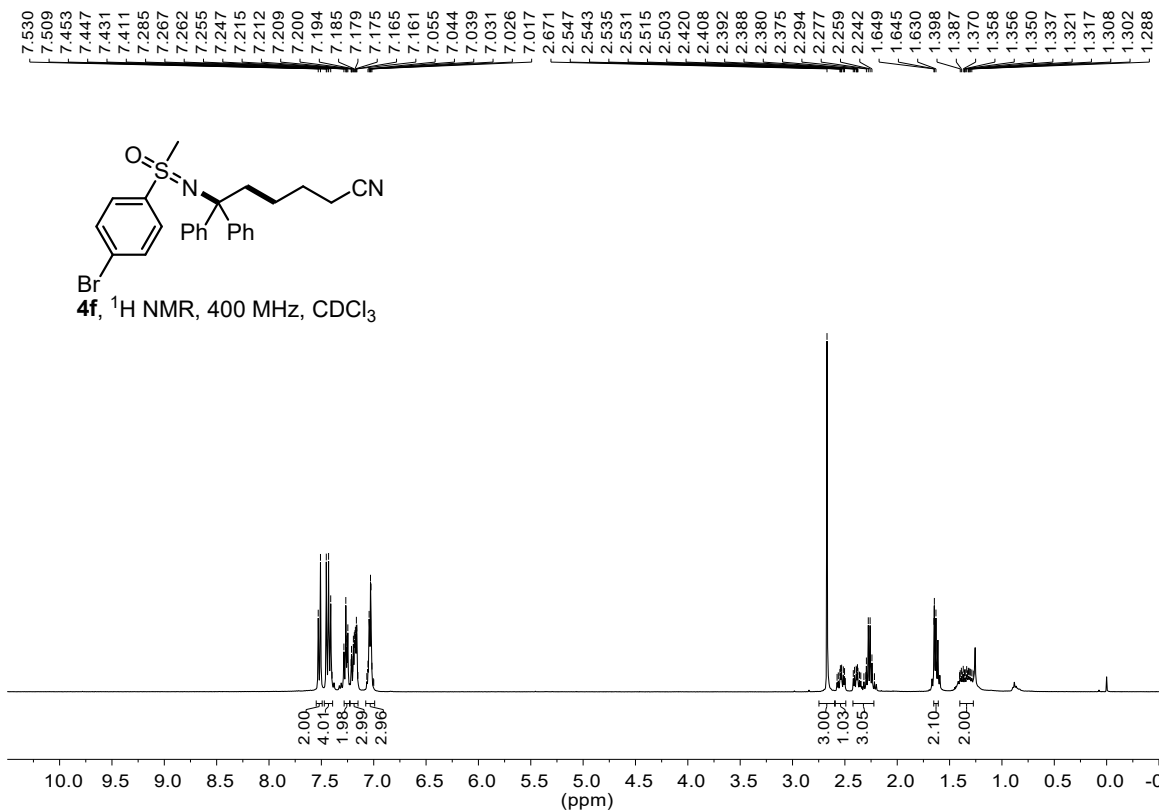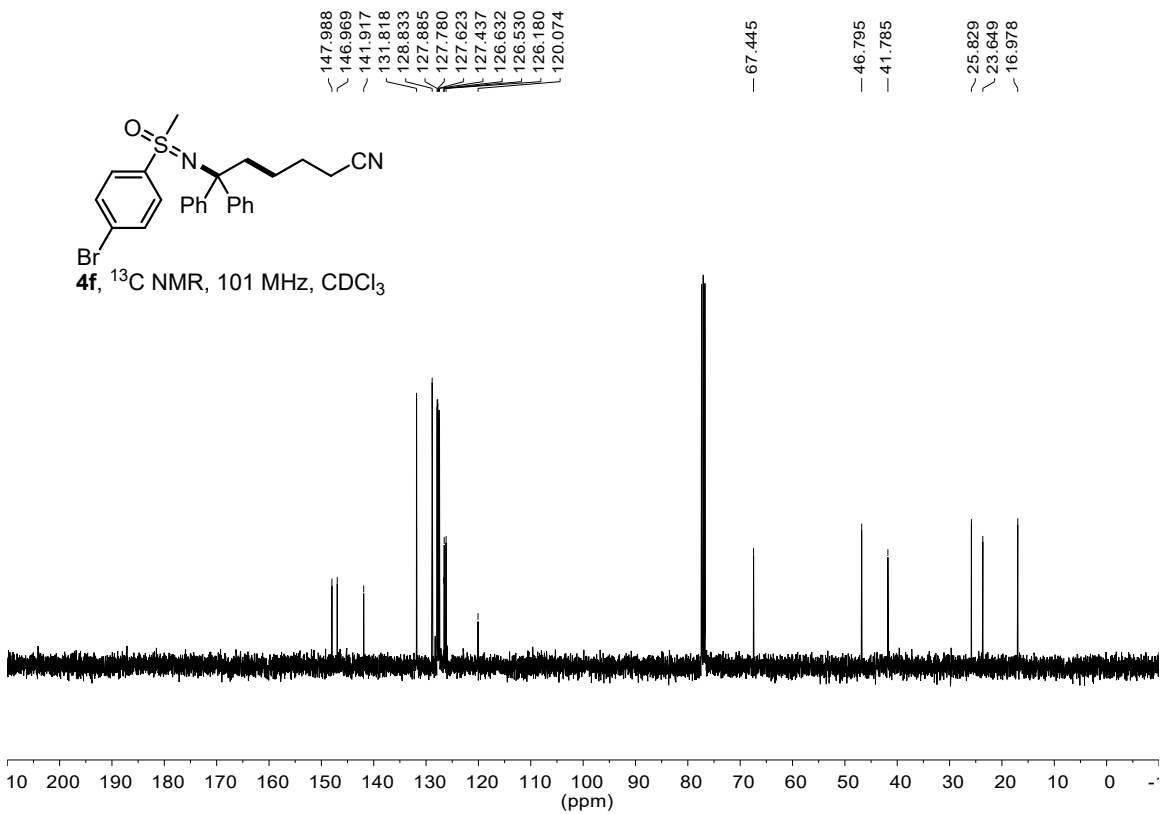



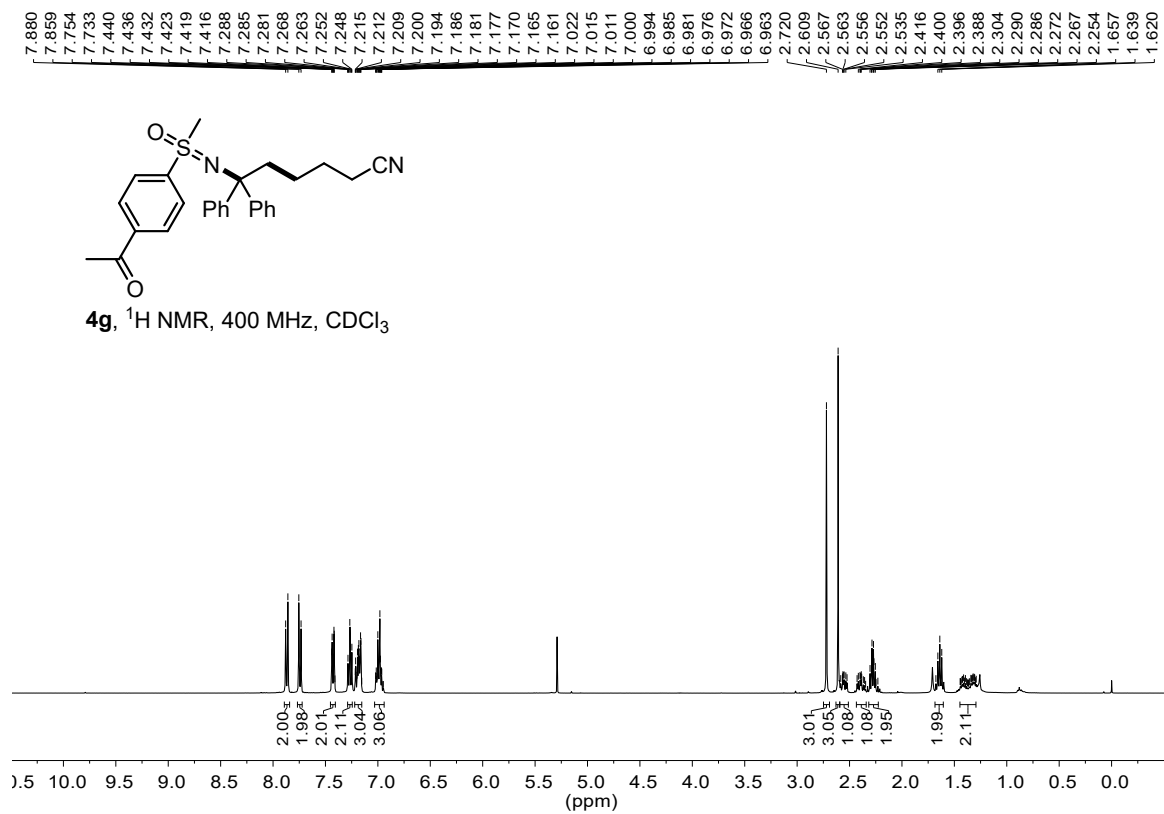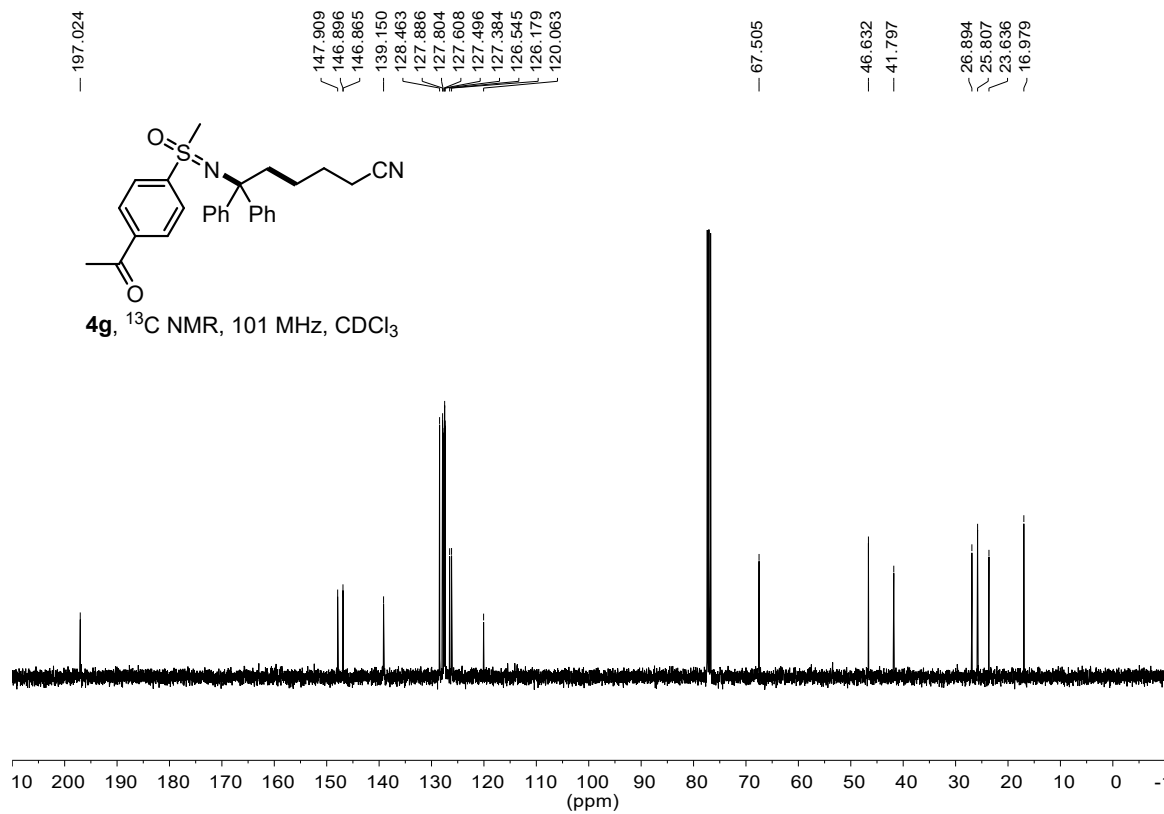

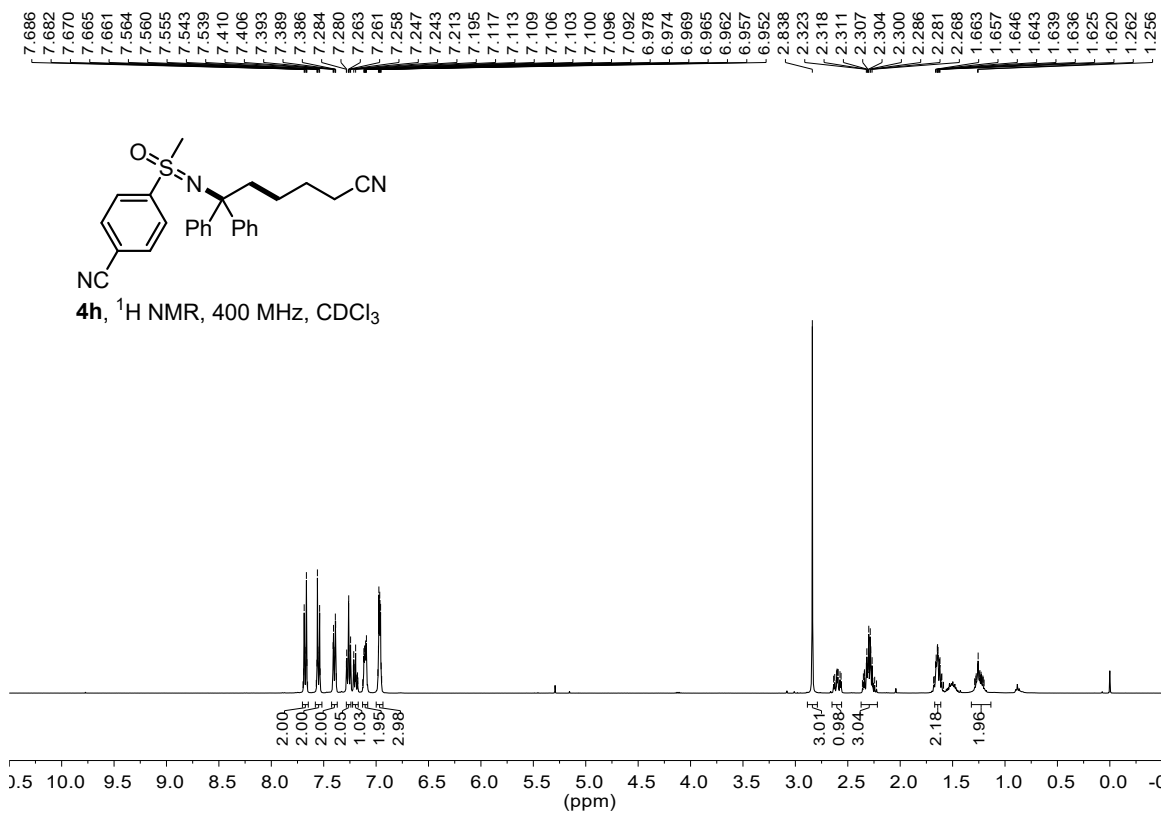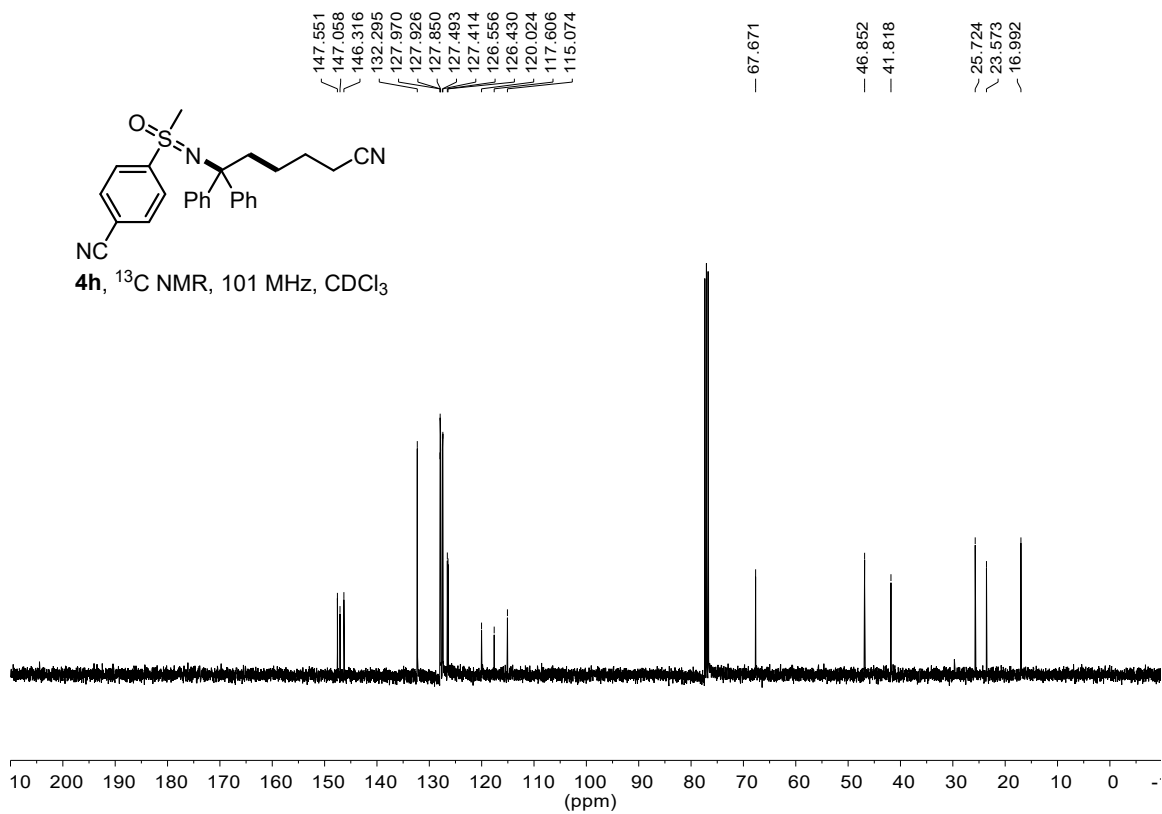

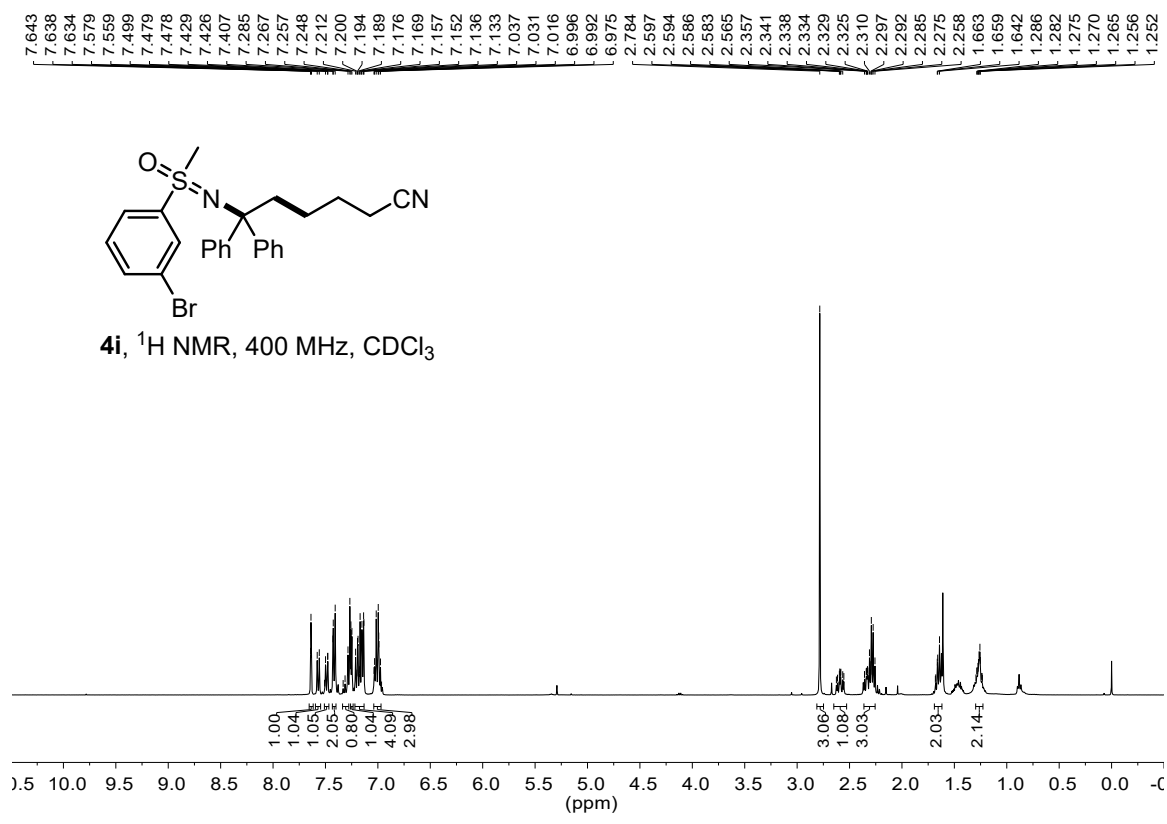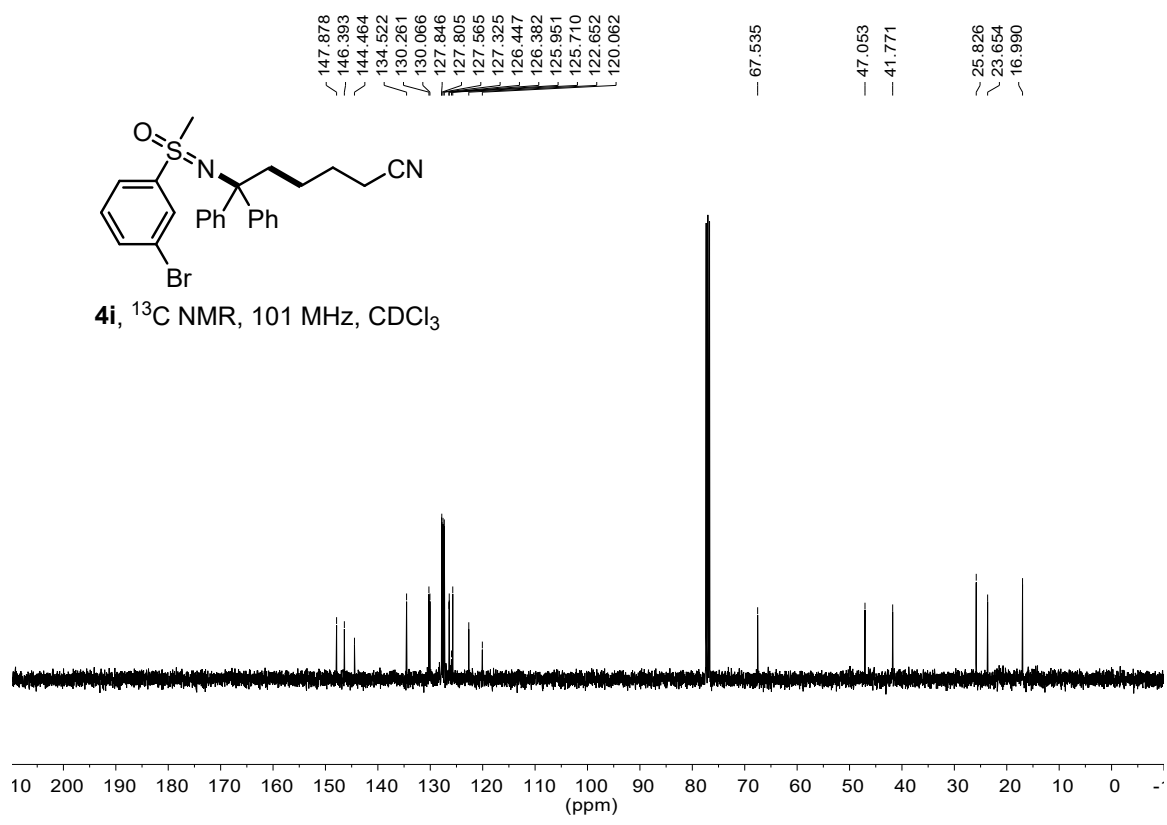

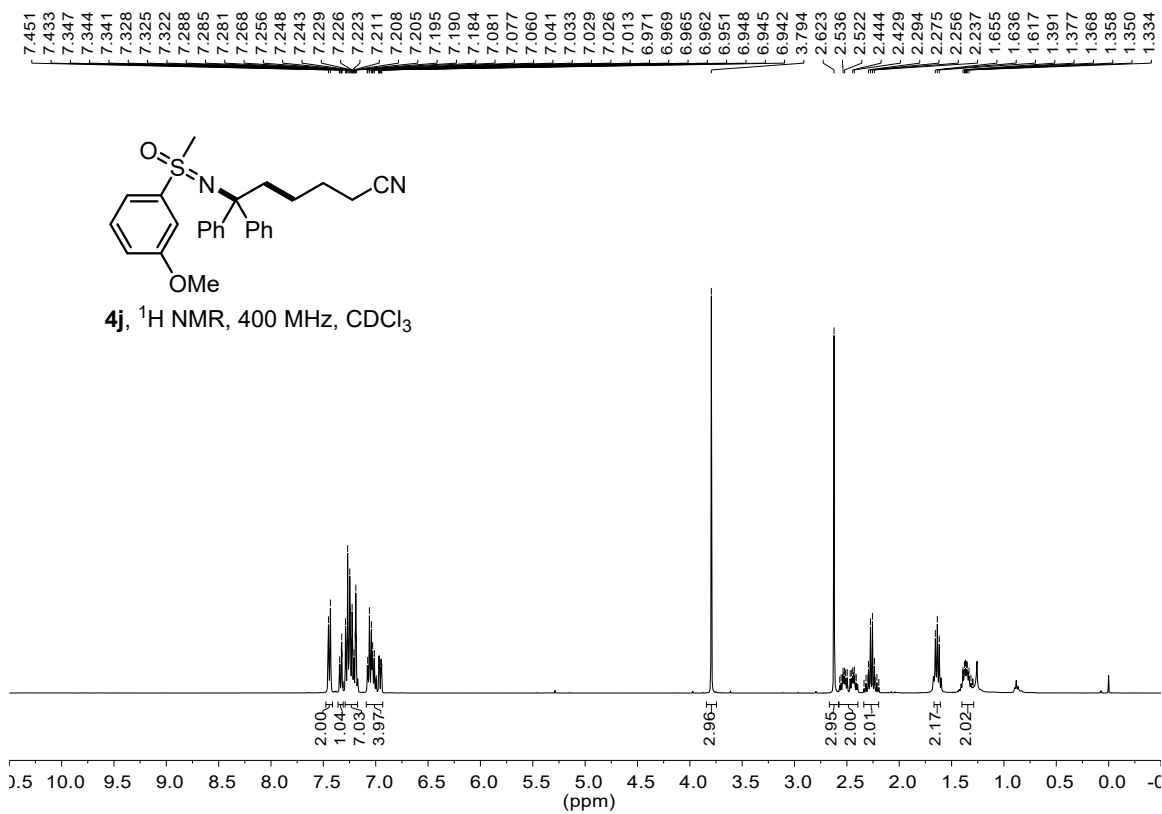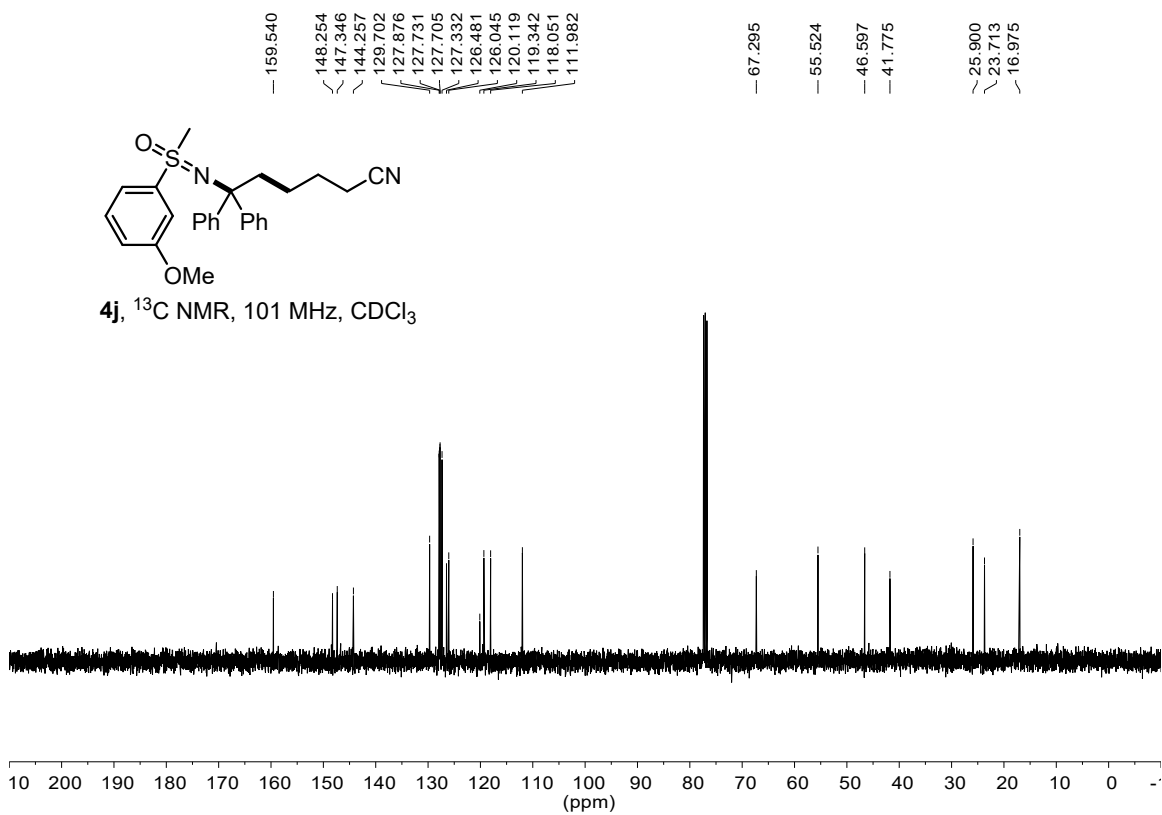

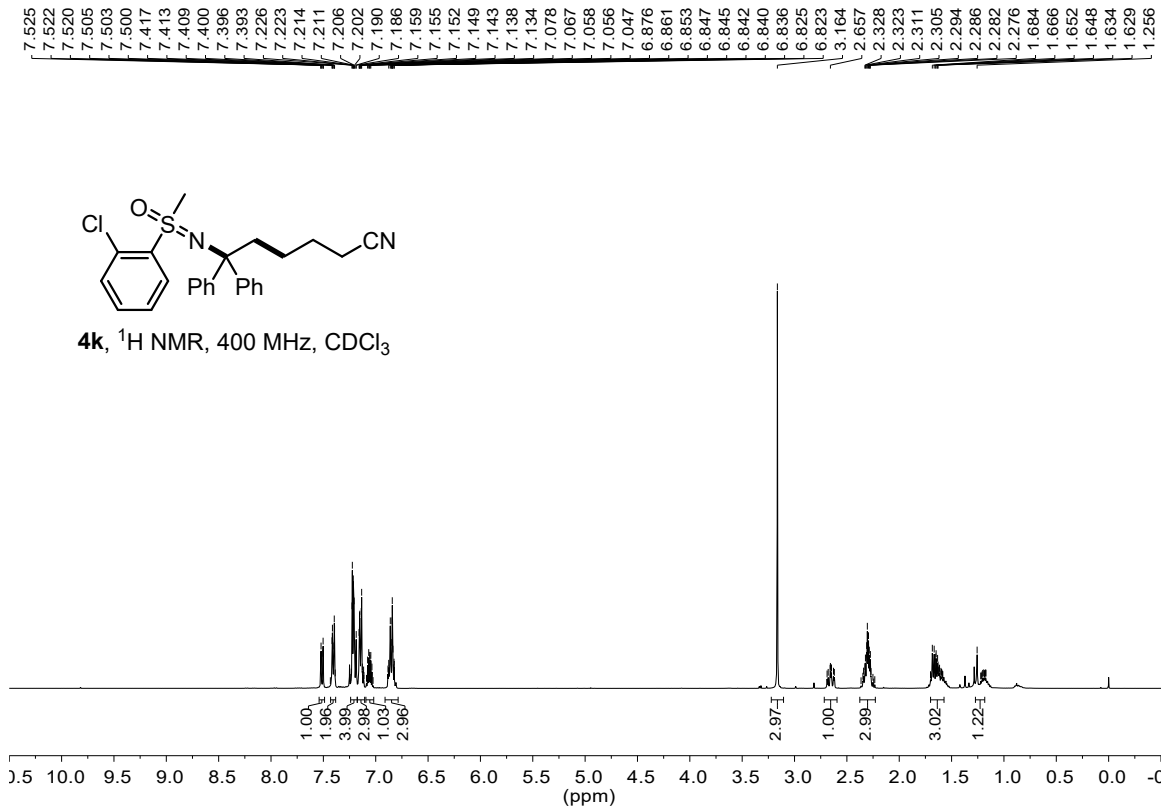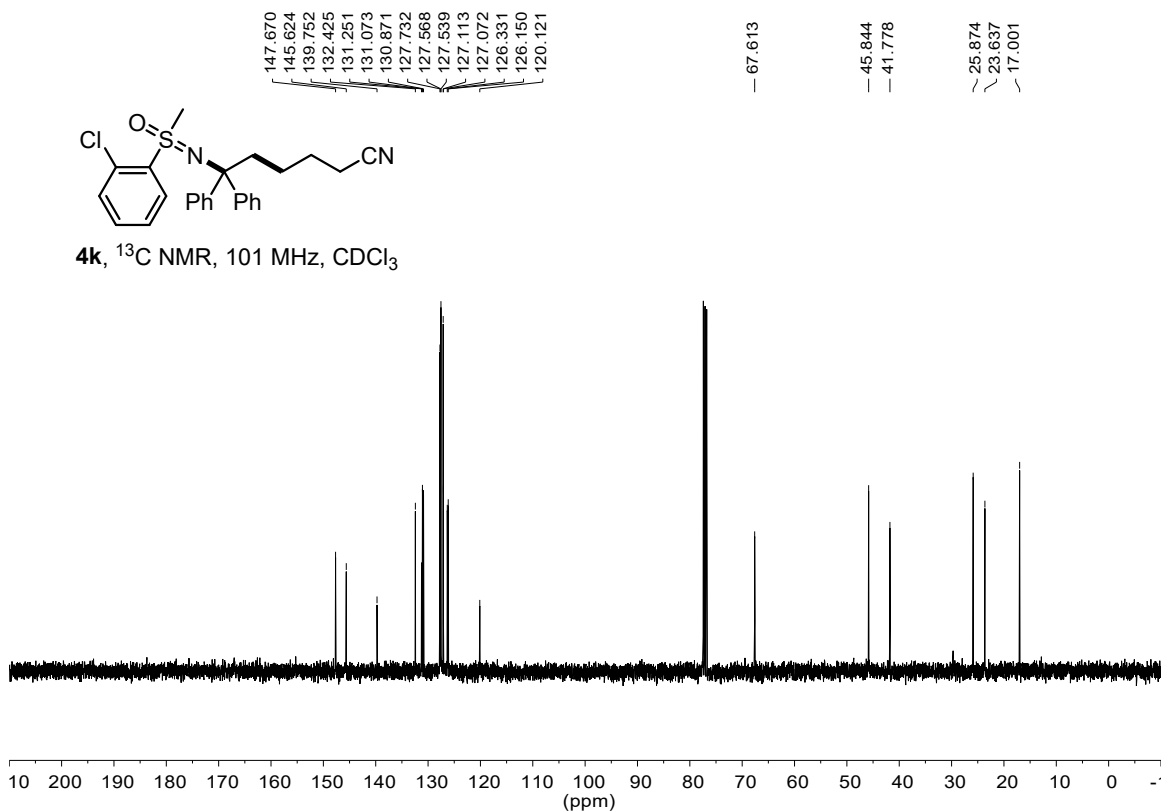

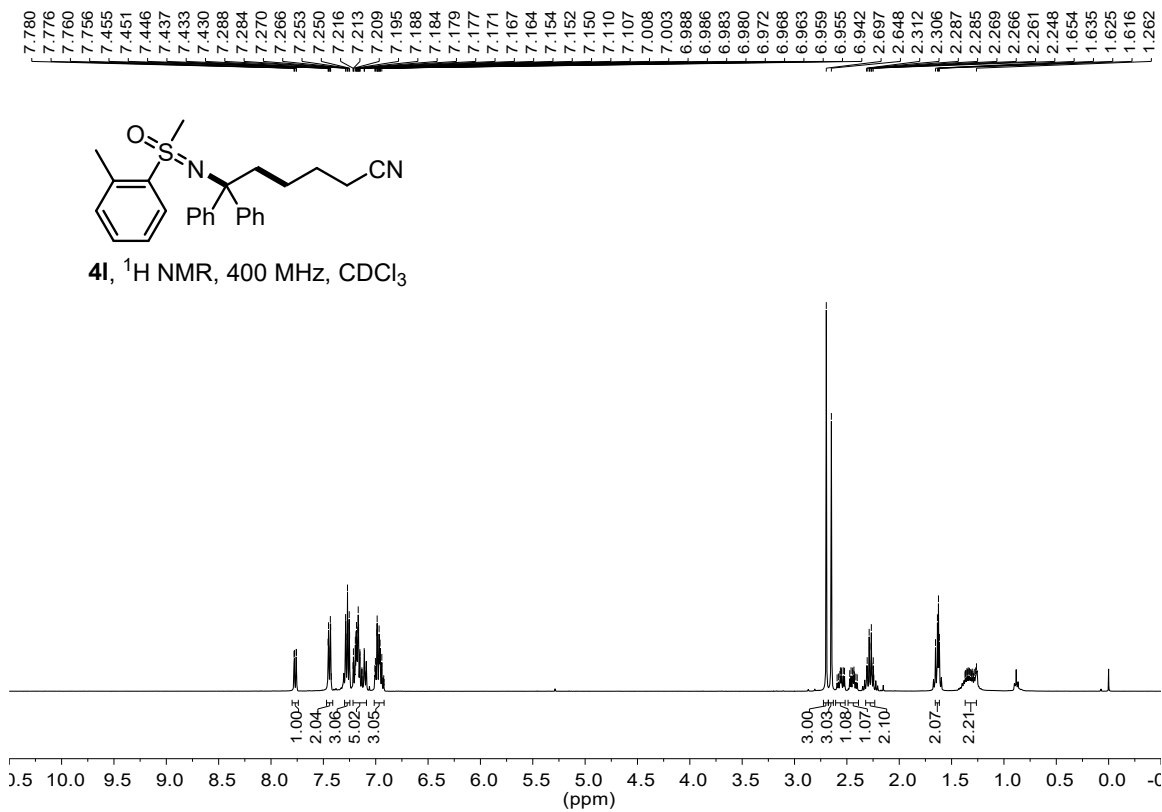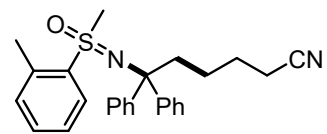

4i,  $^1\text{H}$  NMR, 400 MHz,  $\text{CDCl}_3$

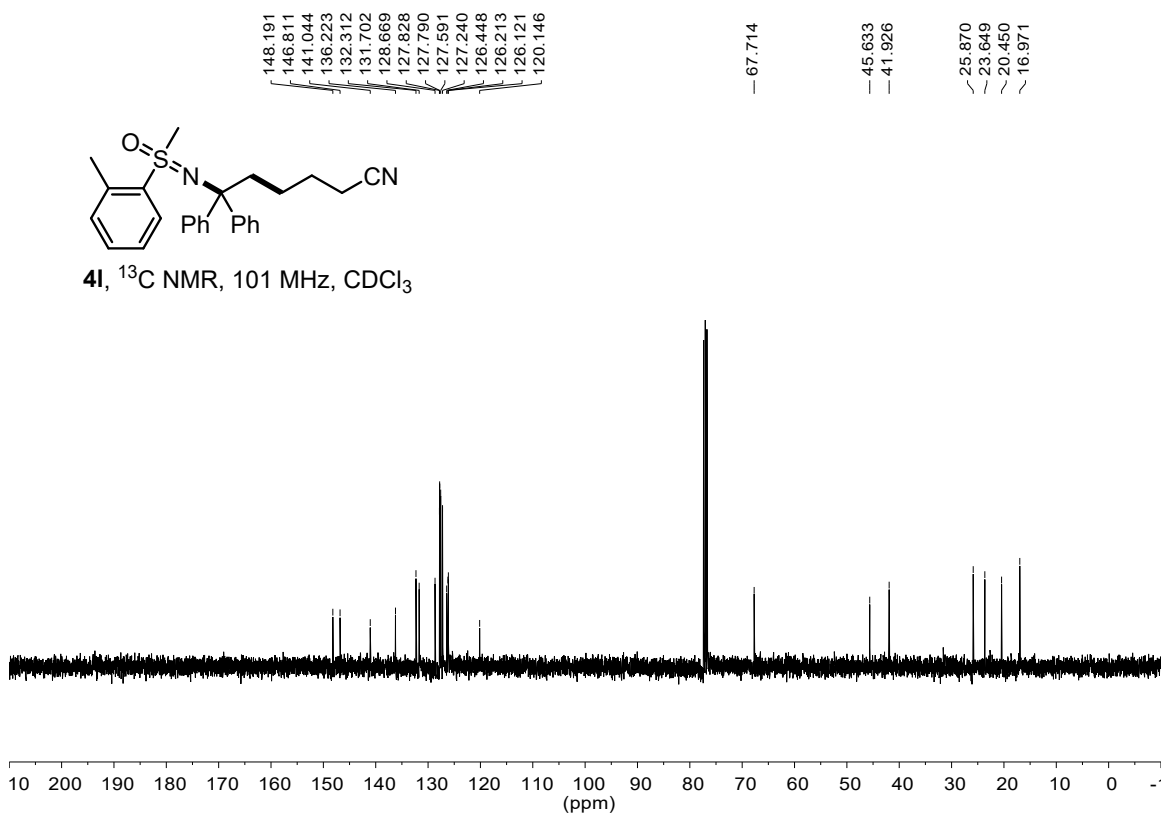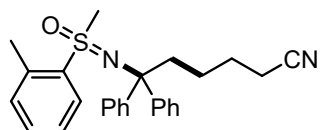

4i,  $^{13}\text{C}$  NMR, 101 MHz,  $\text{CDCl}_3$

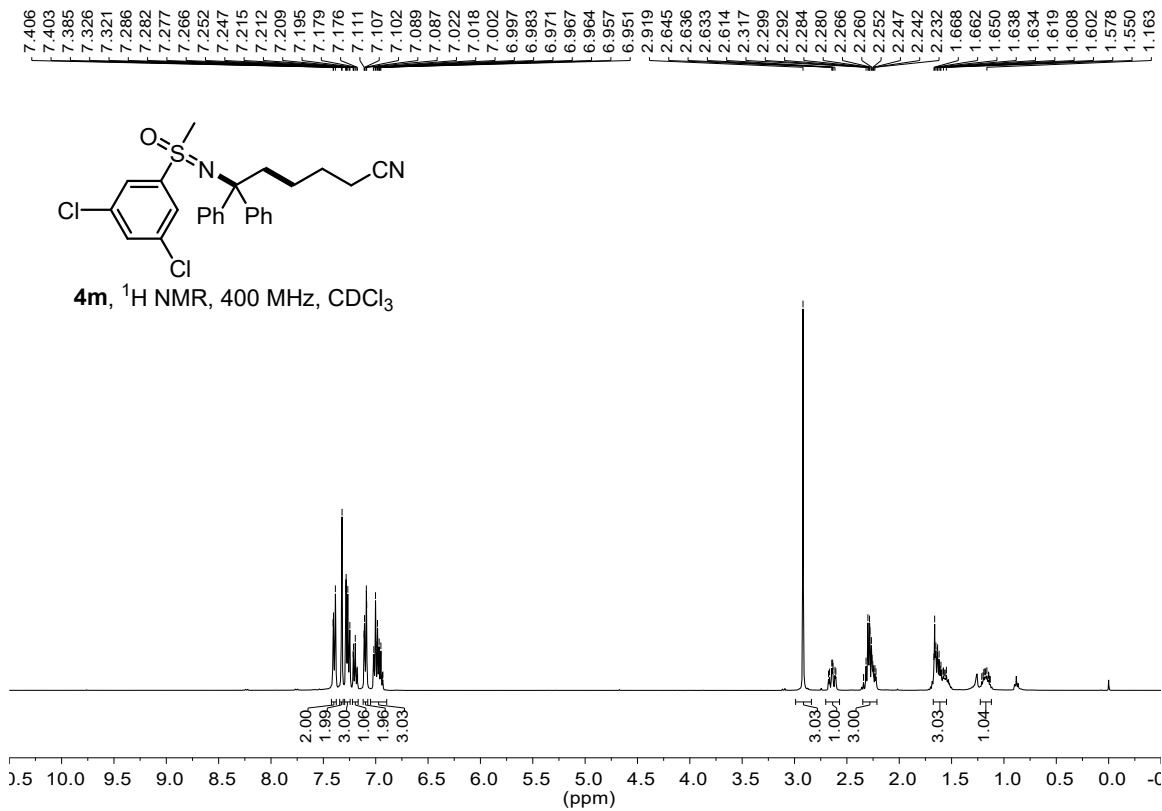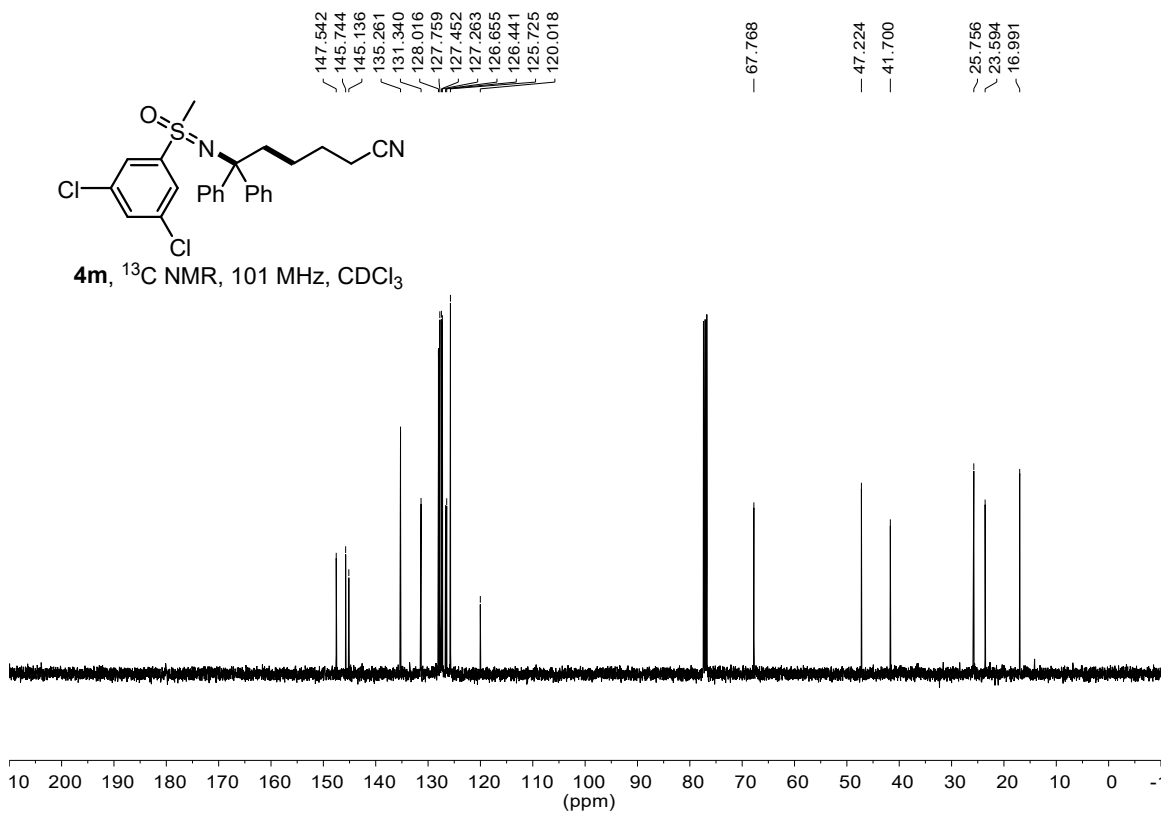

8.201  
8.196  
7.872  
7.868  
7.862  
7.858  
7.852  
7.848  
7.842  
7.838  
7.811  
7.790  
7.754  
7.750  
7.733  
7.728  
7.599  
7.596  
7.580  
7.576  
7.573  
7.557  
7.554  
7.489  
7.485  
7.480  
7.471  
7.468  
7.465  
7.292  
7.290  
7.272  
7.268  
7.252  
7.246  
7.241  
7.232  
7.229  
7.226  
7.204  
6.975  
6.956  
6.953  
6.937  
6.869  
6.851  
2.693  
2.298  
2.279  
2.276  
2.261  
2.258  
2.239  
1.647  
1.628  
1.393  
1.387  
1.379  
1.256

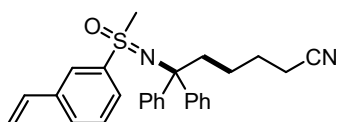

**4n**,  $^1\text{H}$  NMR, 400 MHz,  $\text{CDCl}_3$

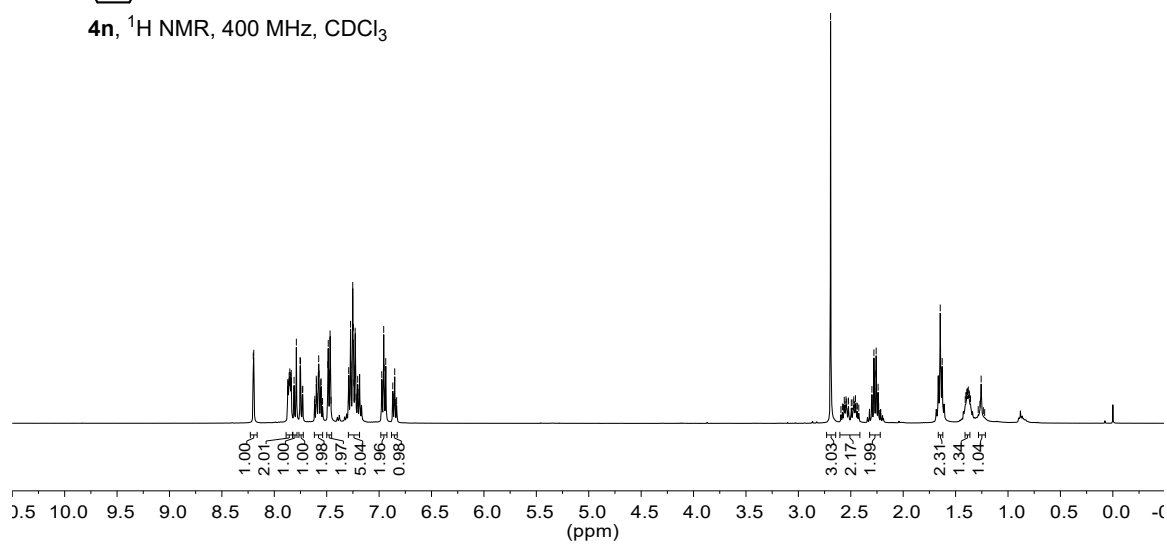

148.295  
147.314  
139.810  
134.374  
132.287  
129.144  
128.792  
128.366  
128.182  
127.891  
127.733  
127.697  
127.291  
127.139  
126.504  
126.025  
122.821  
120.139  
67.385  
46.596  
41.788  
25.924  
23.748  
16.990

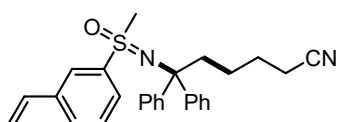

**4n**,  $^{13}\text{C}$  NMR, 101 MHz,  $\text{CDCl}_3$

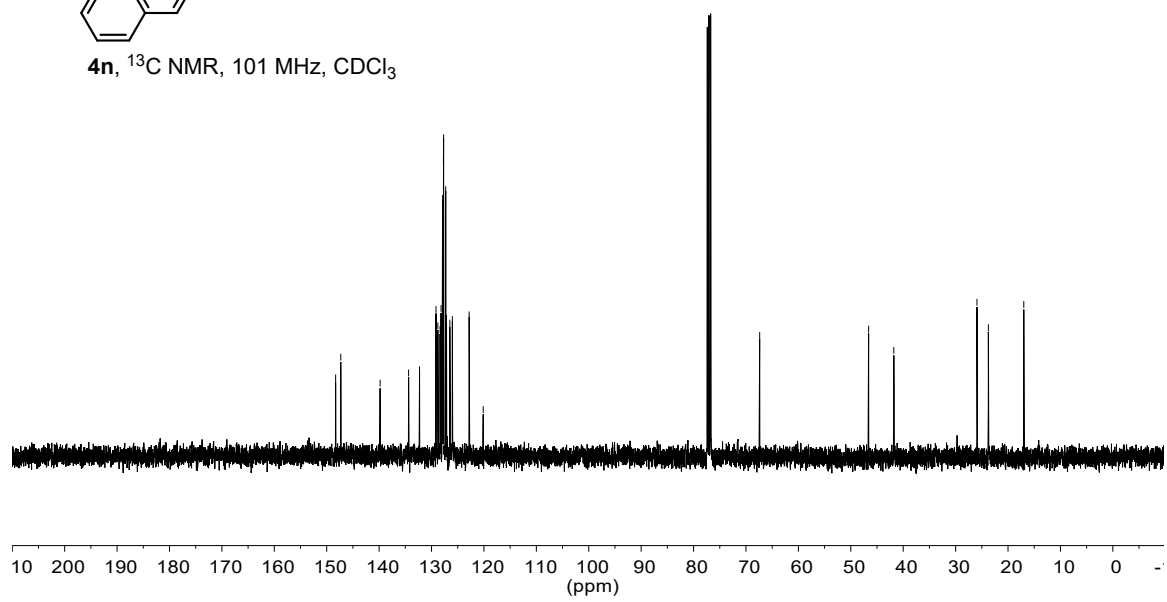



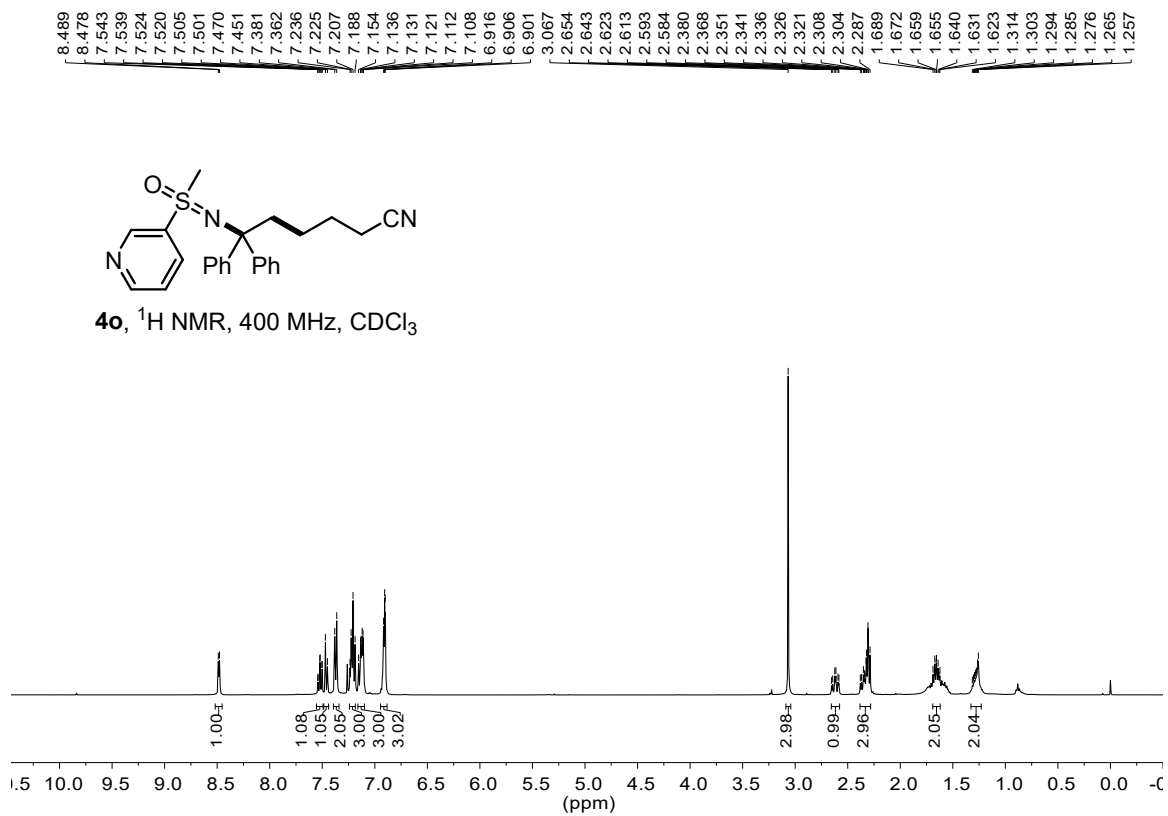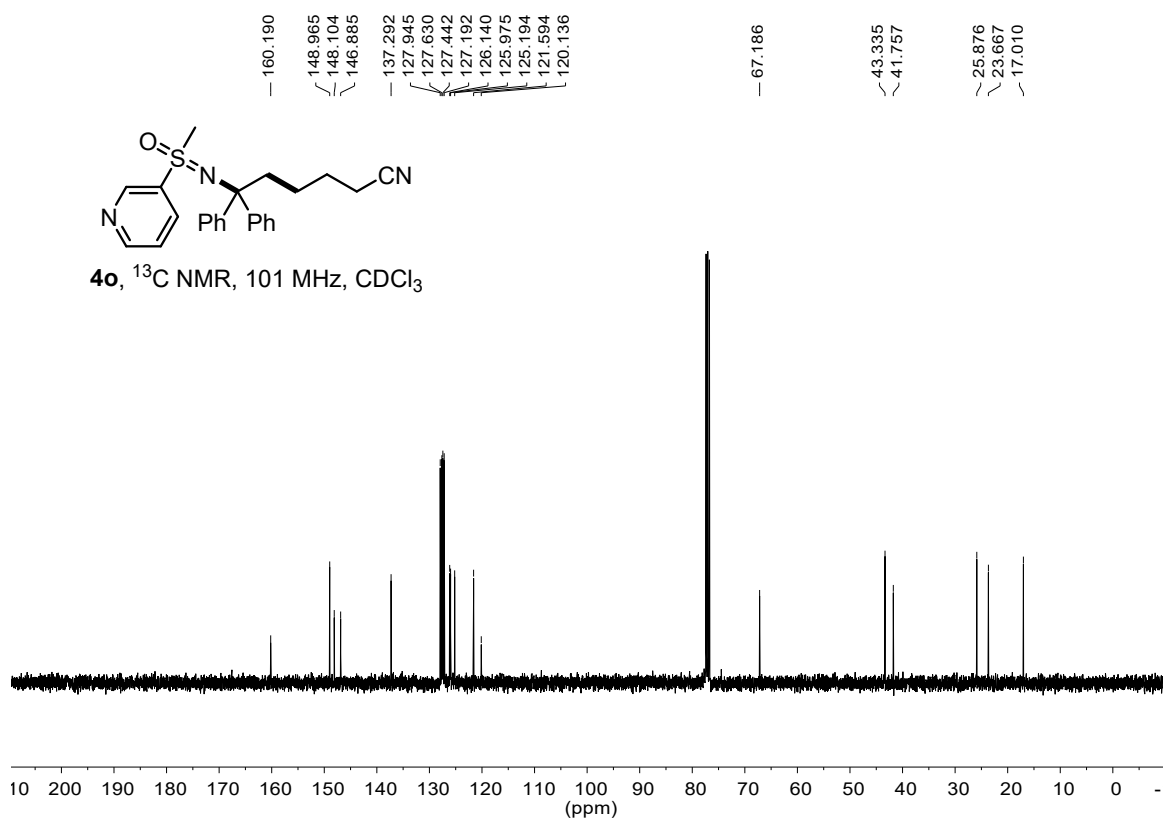

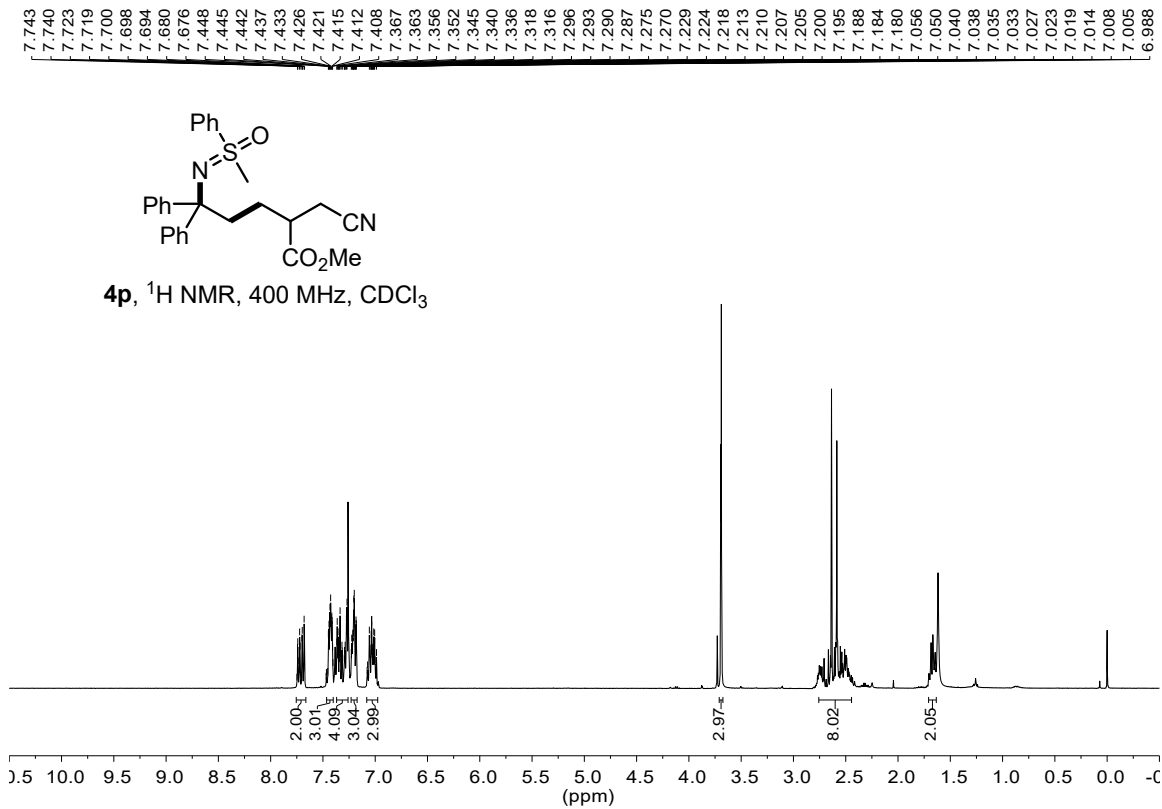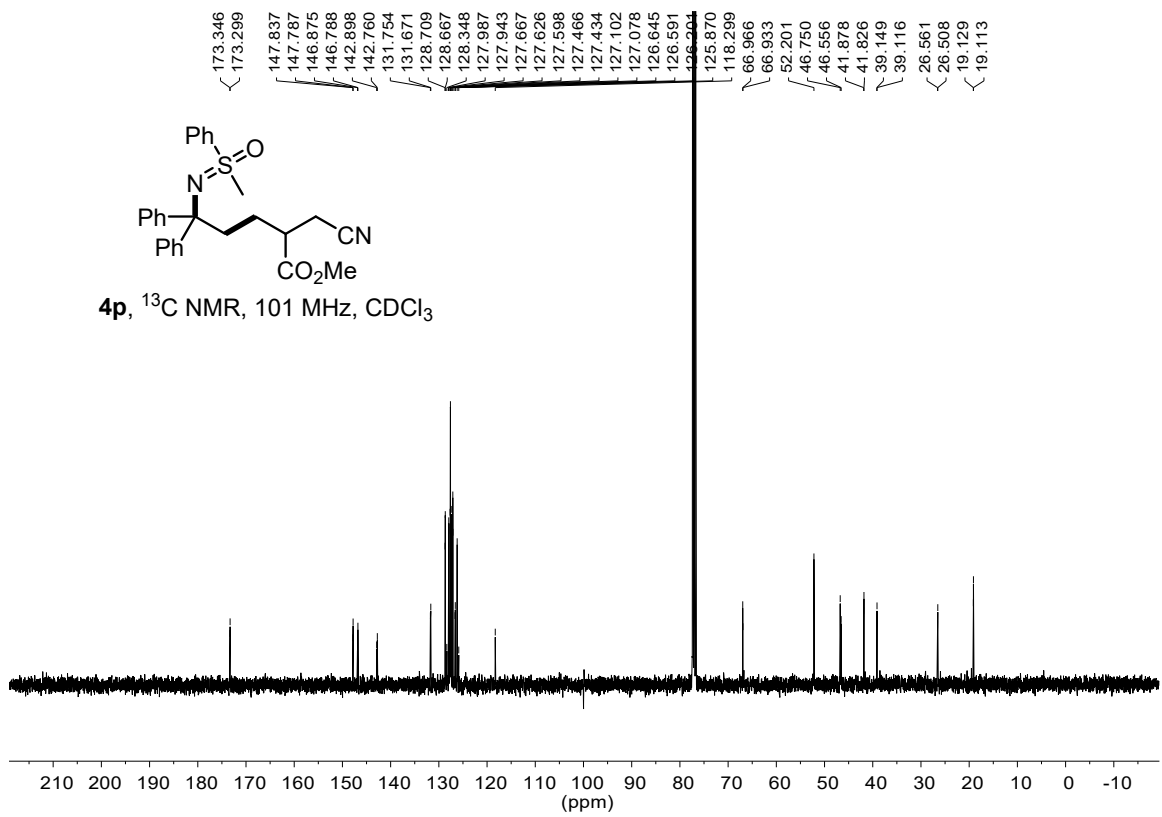

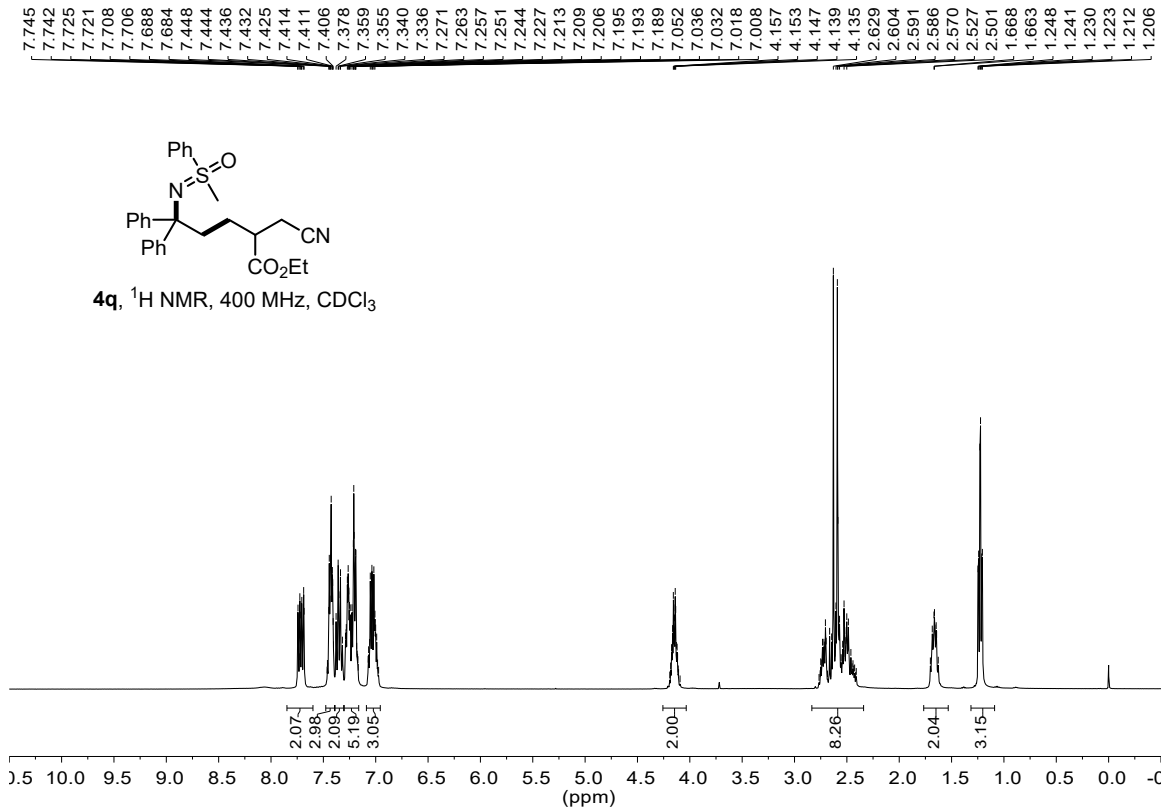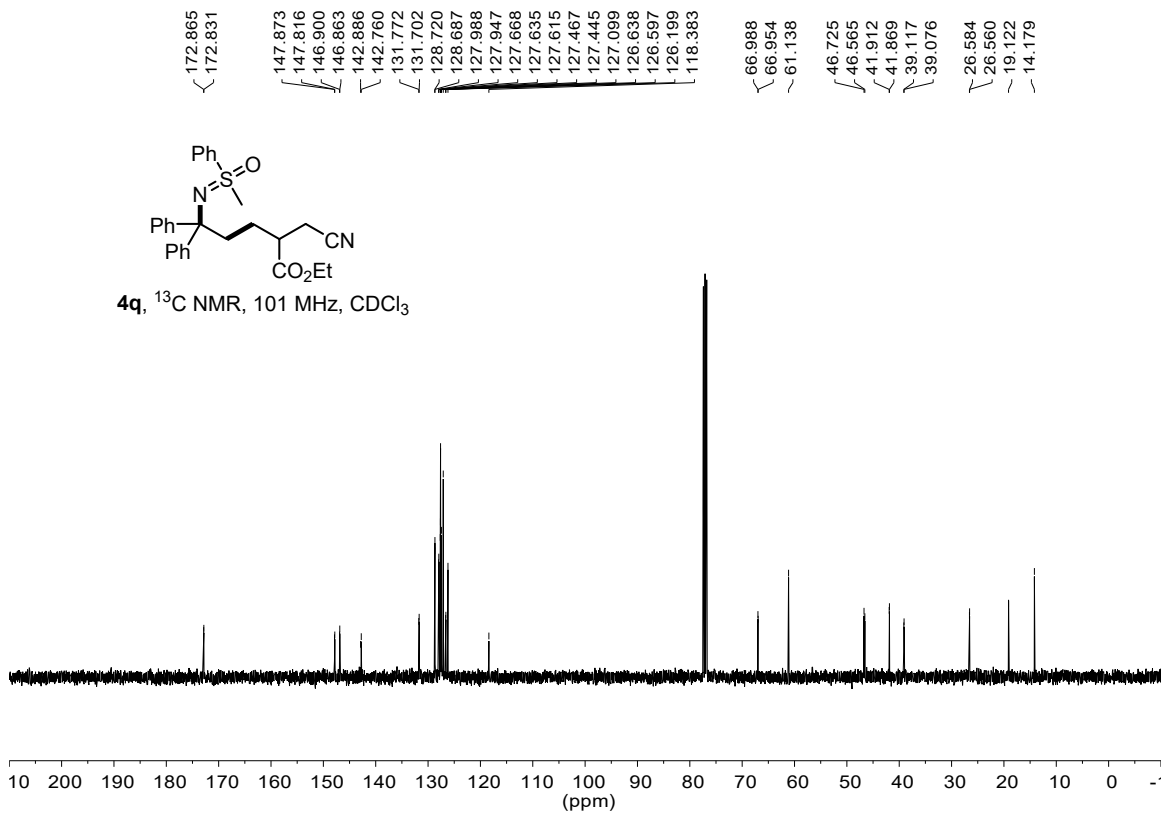

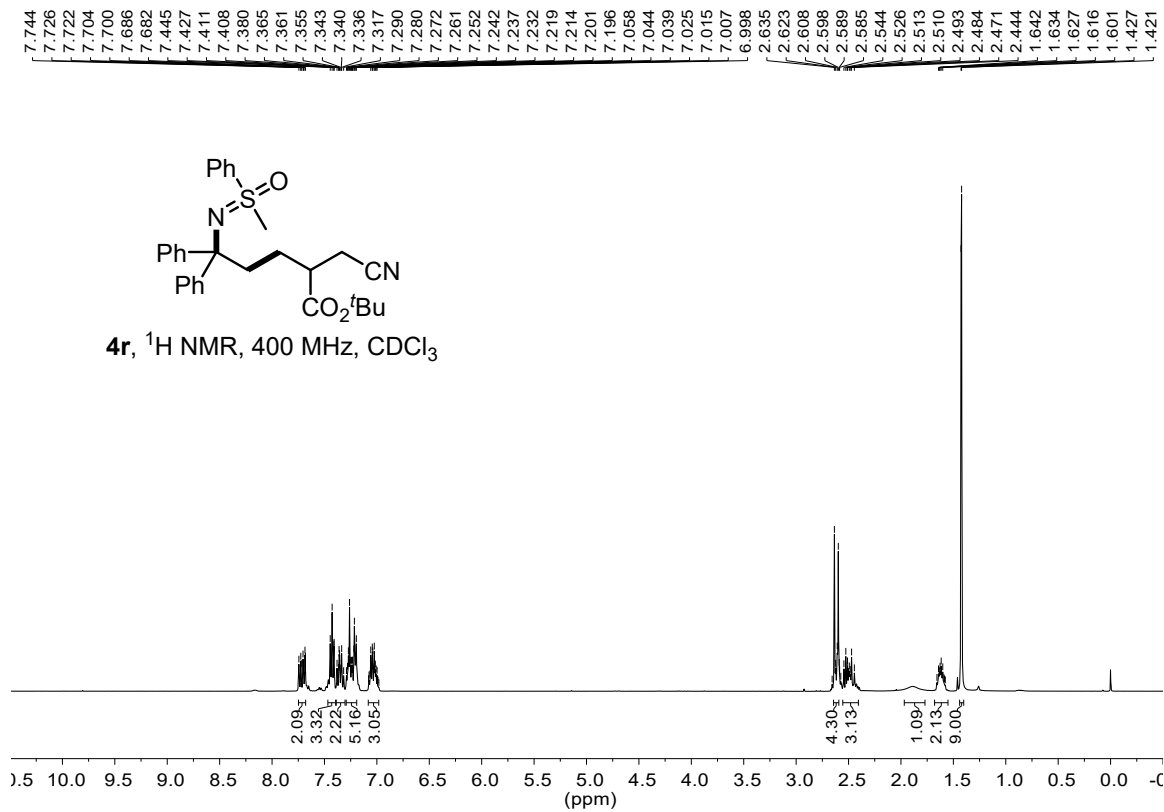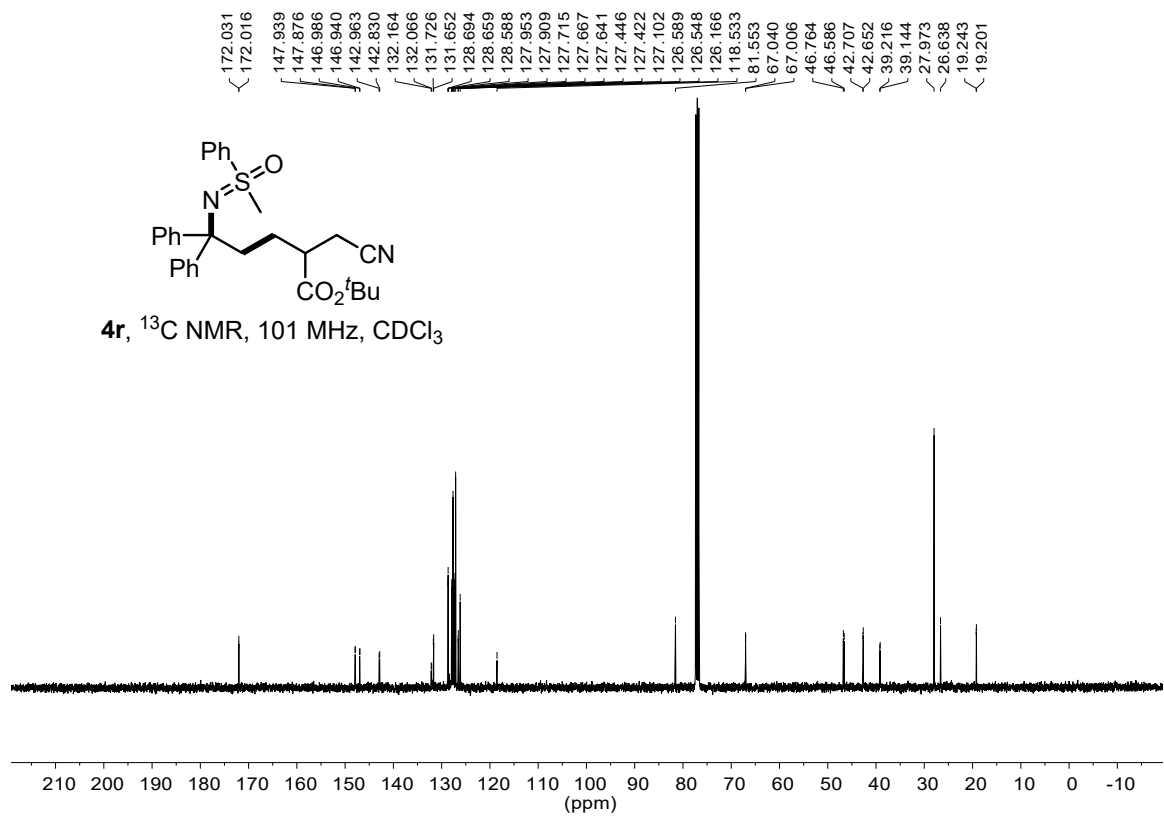

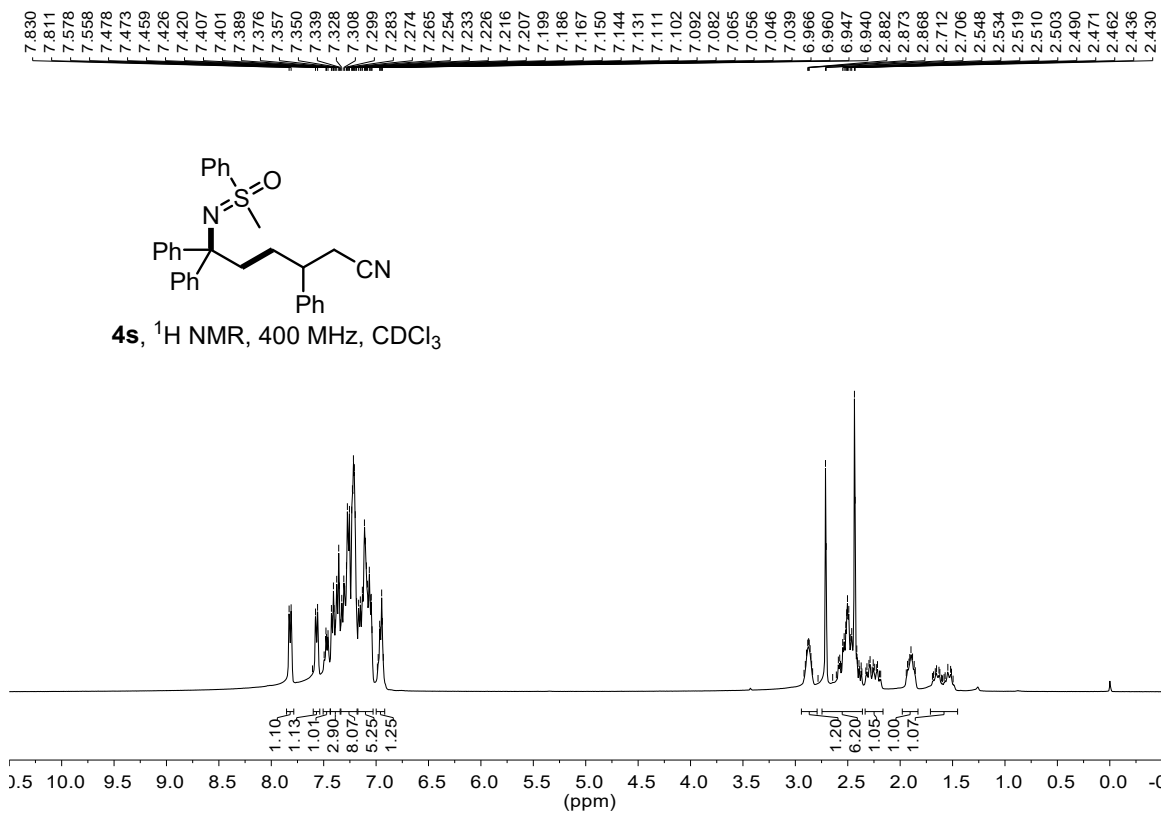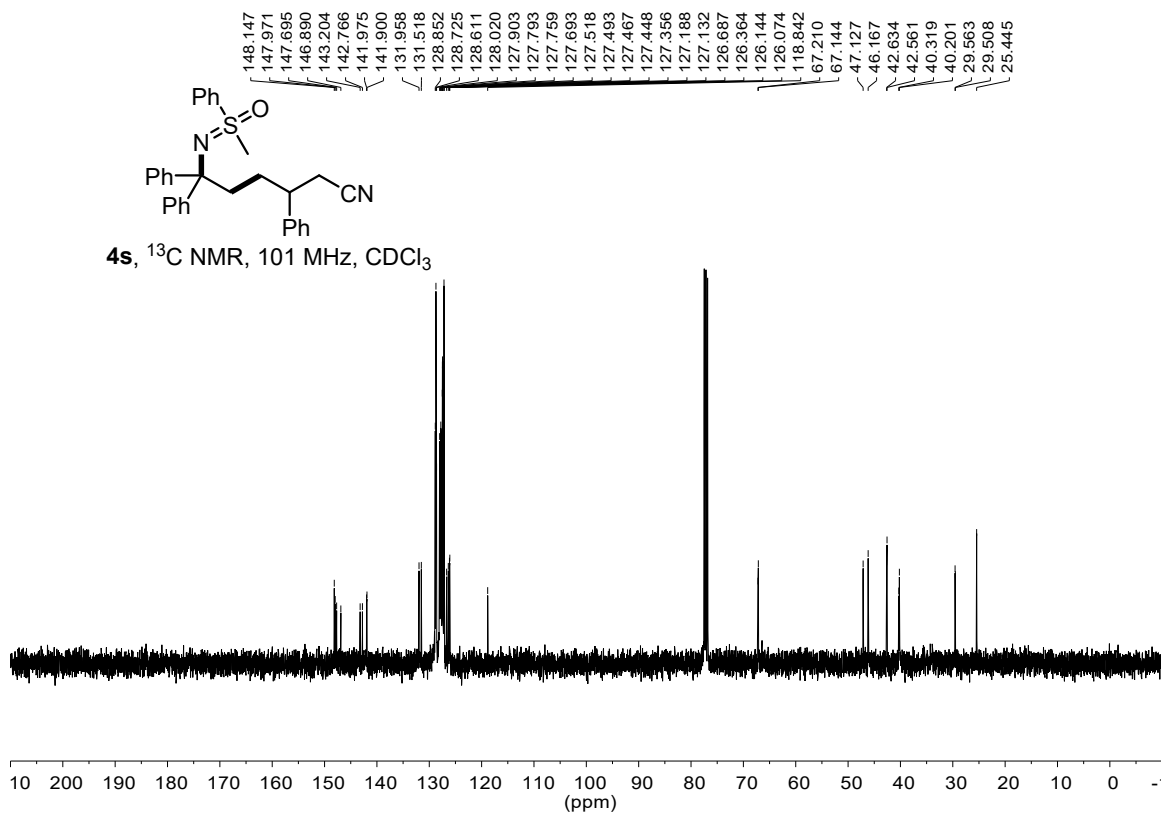

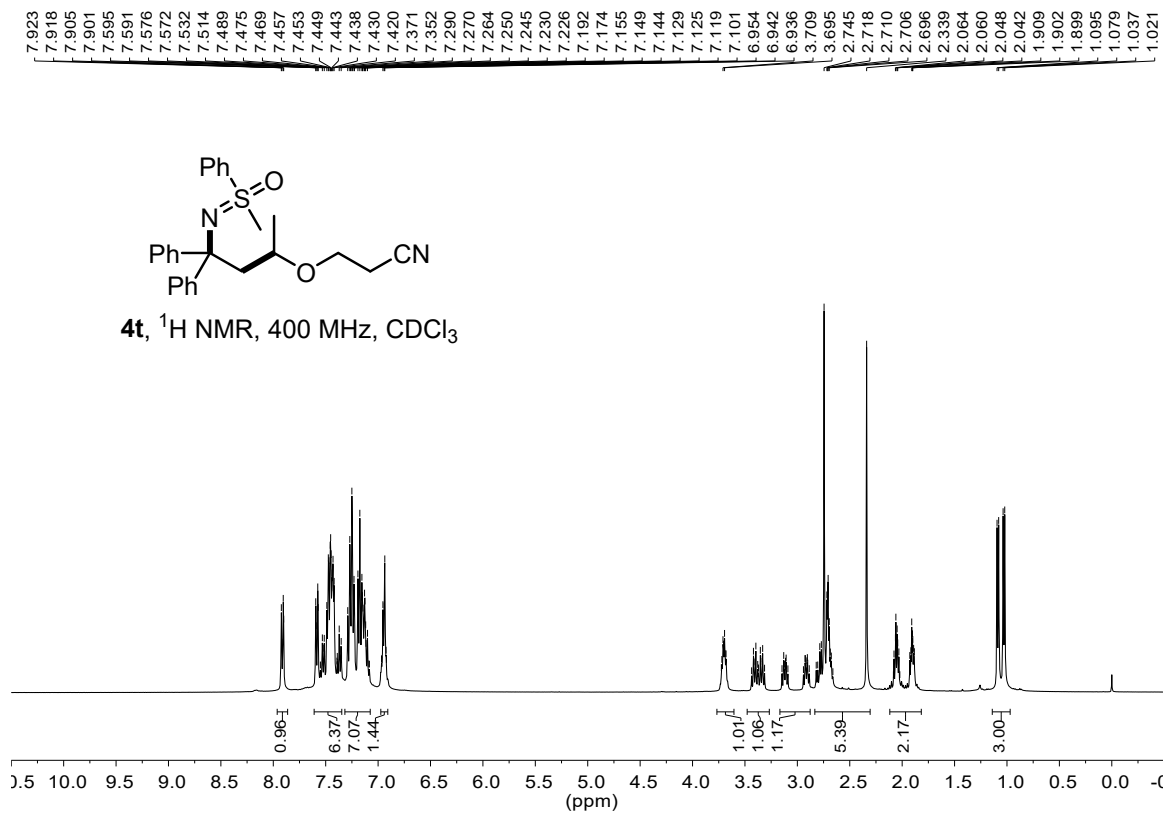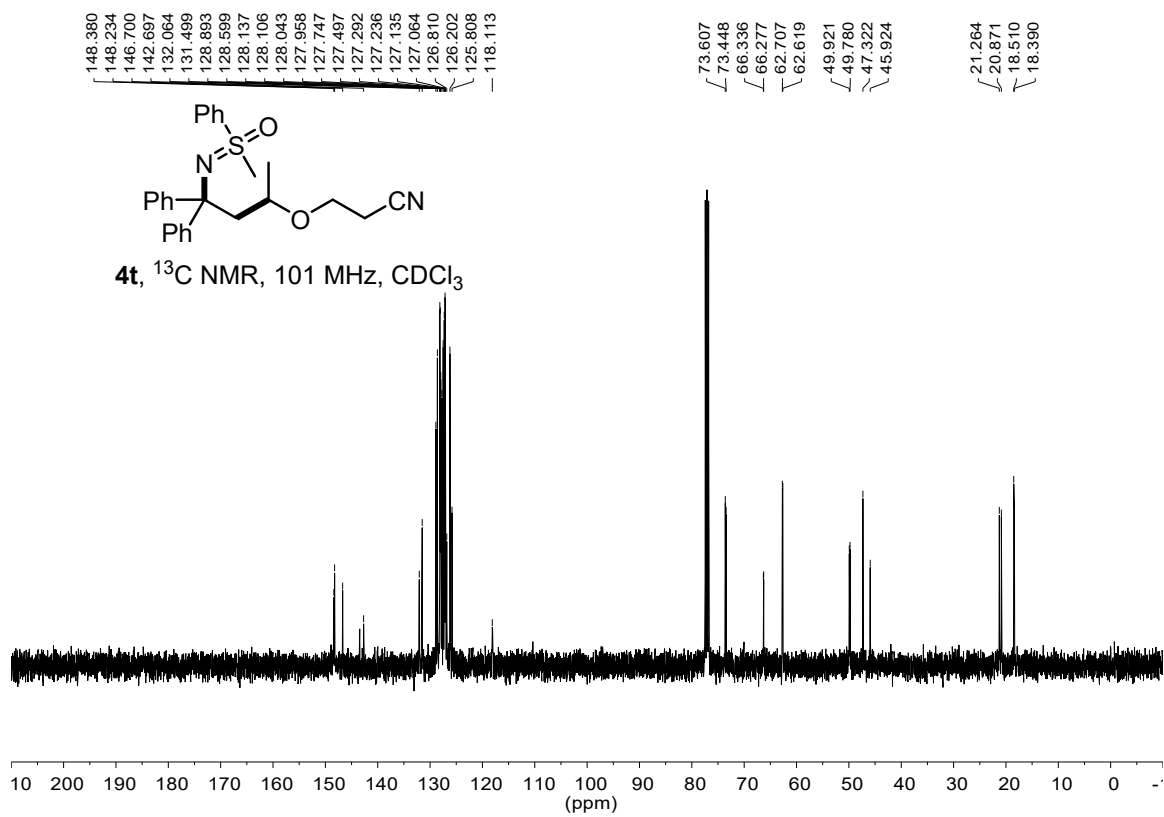

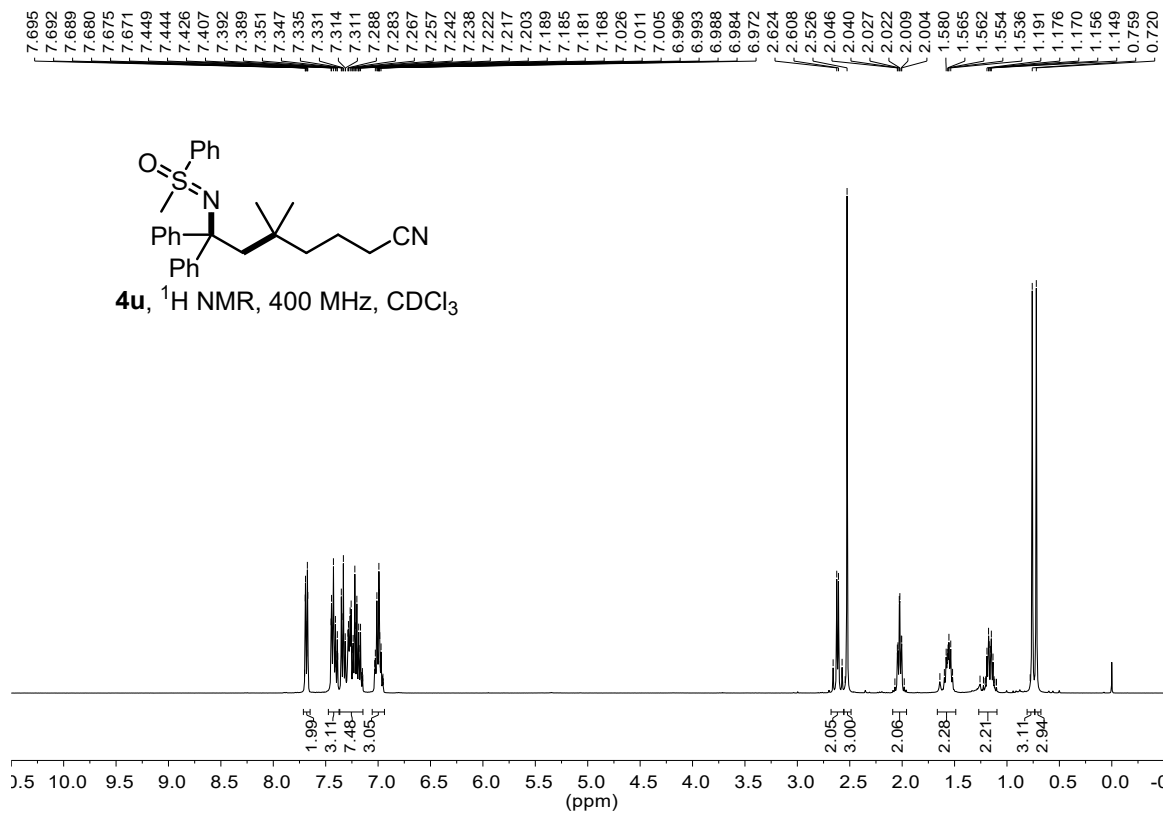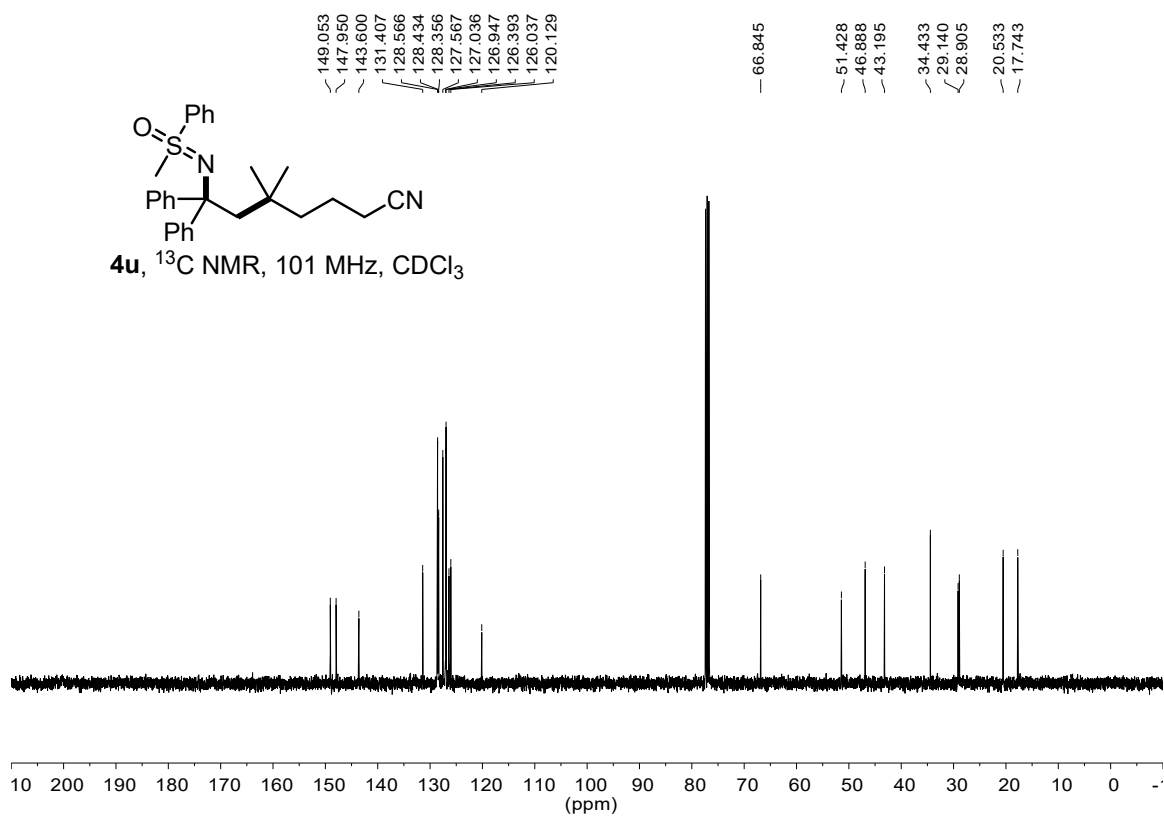

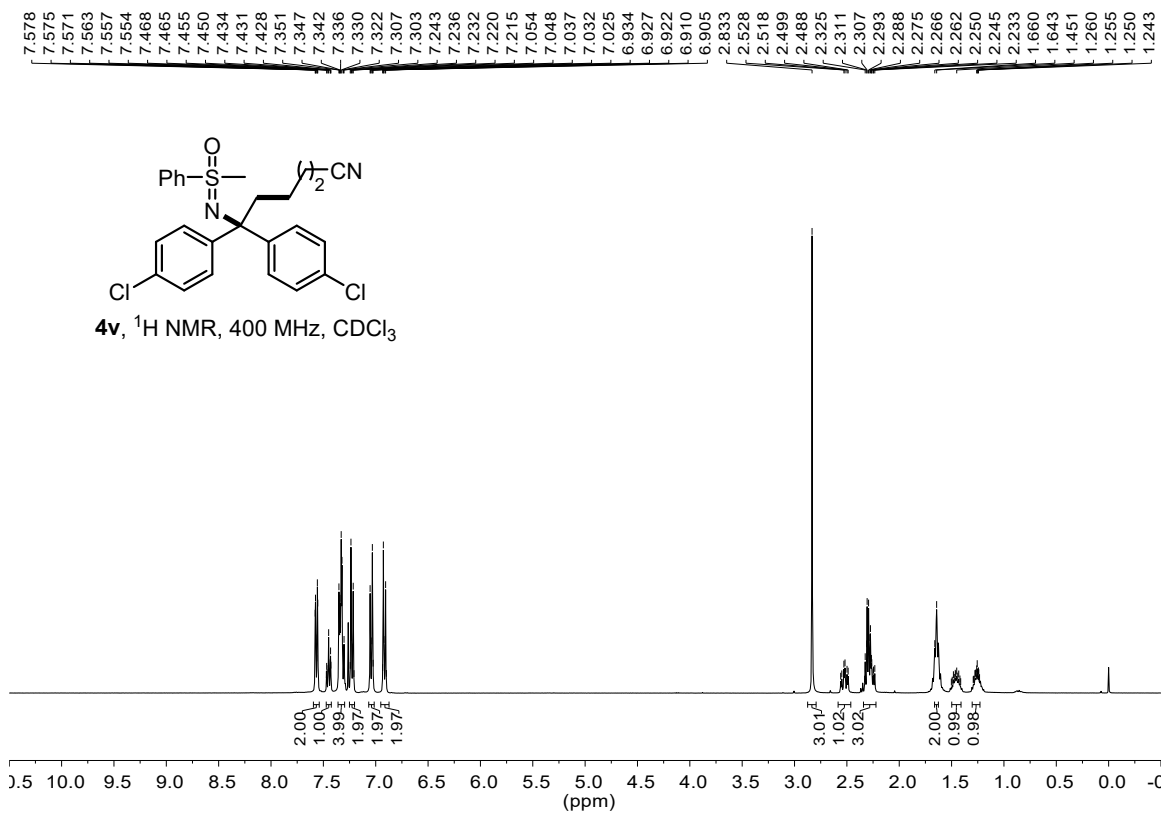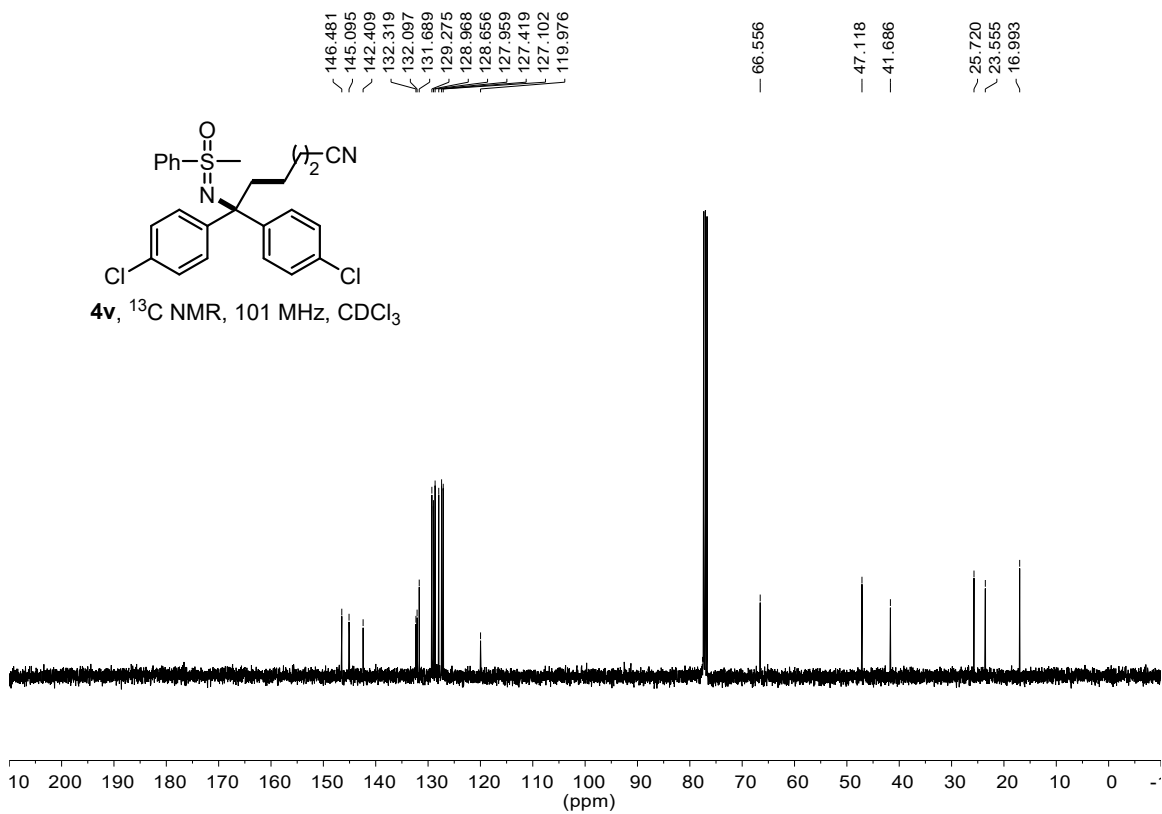



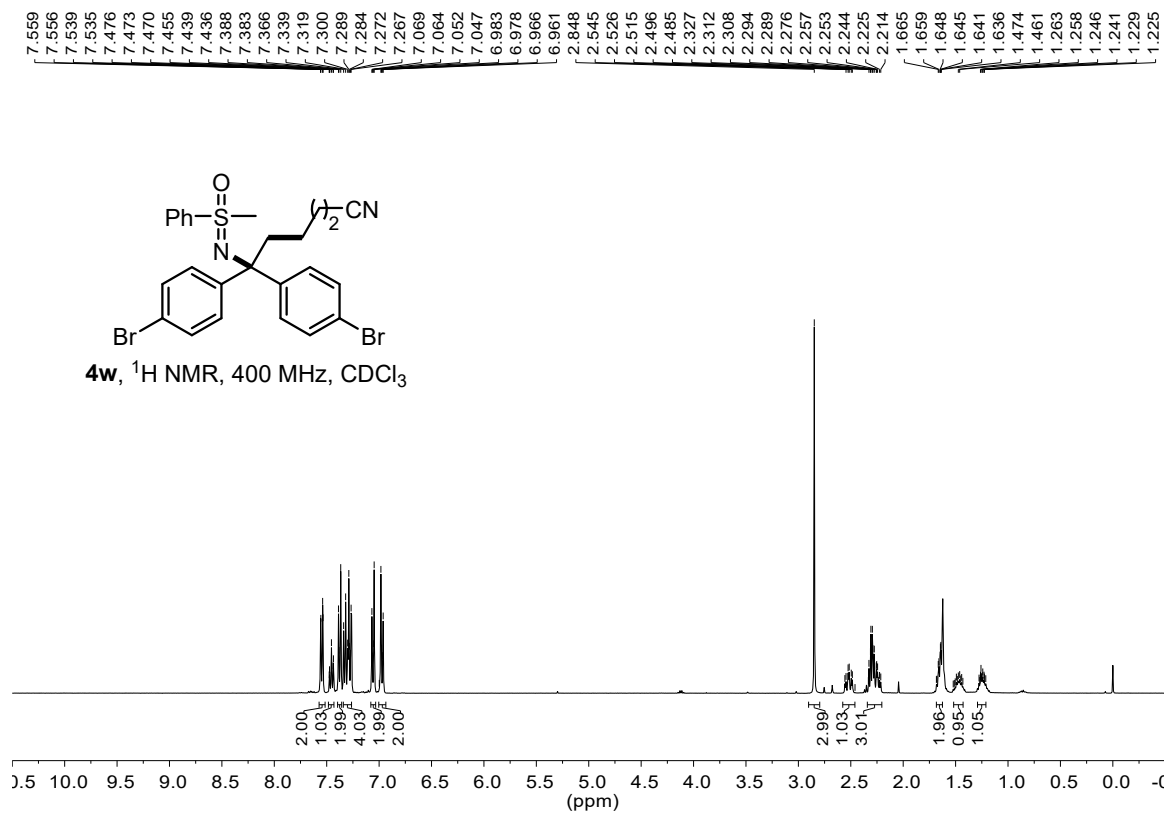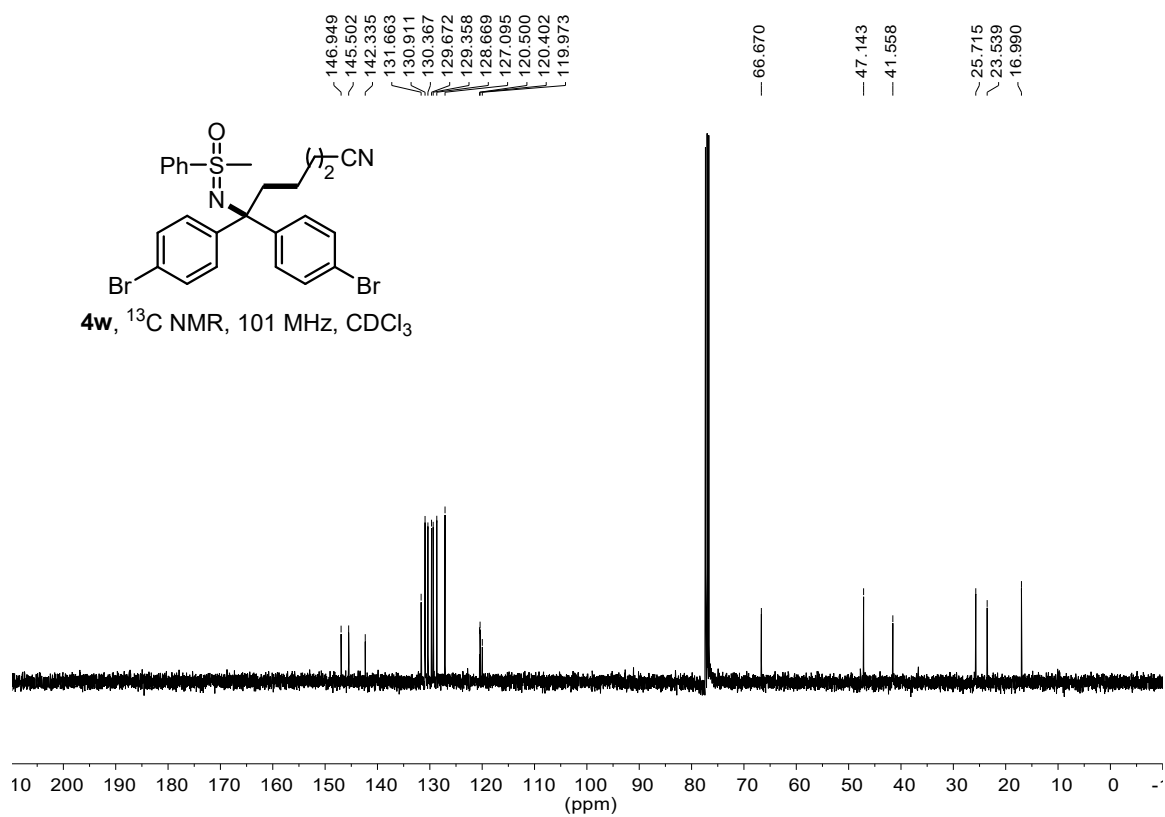

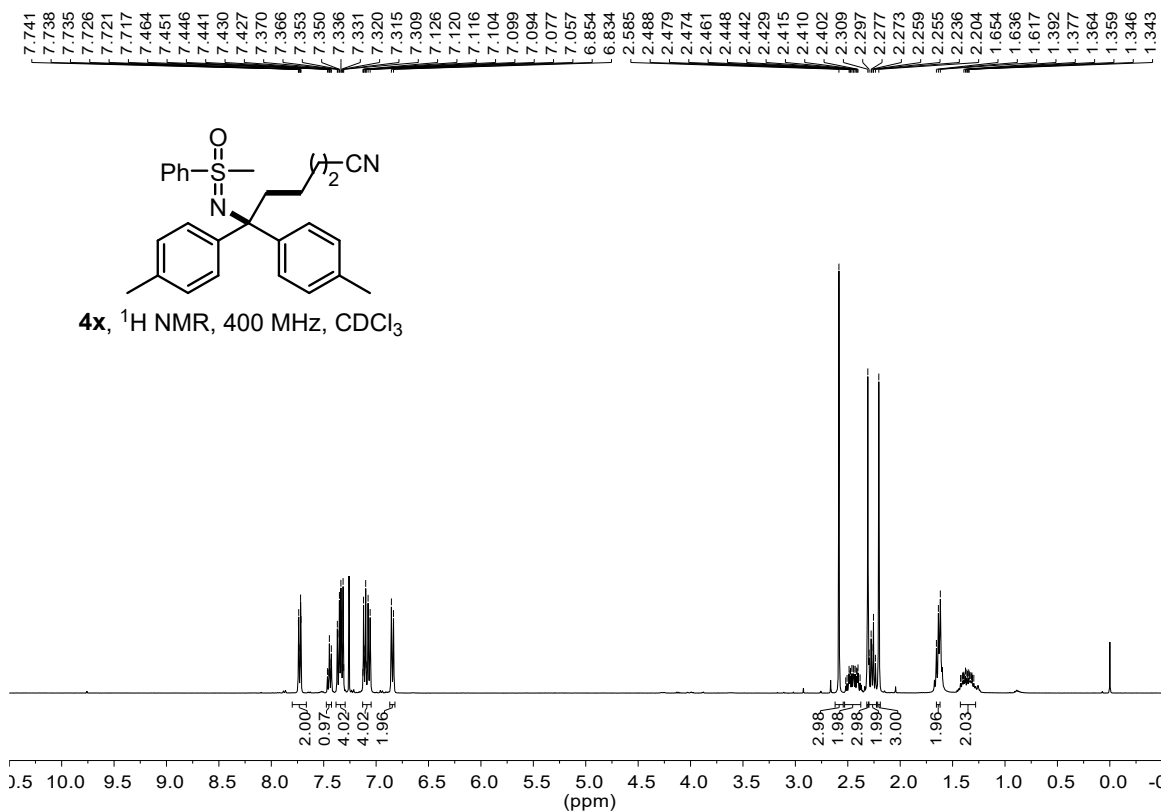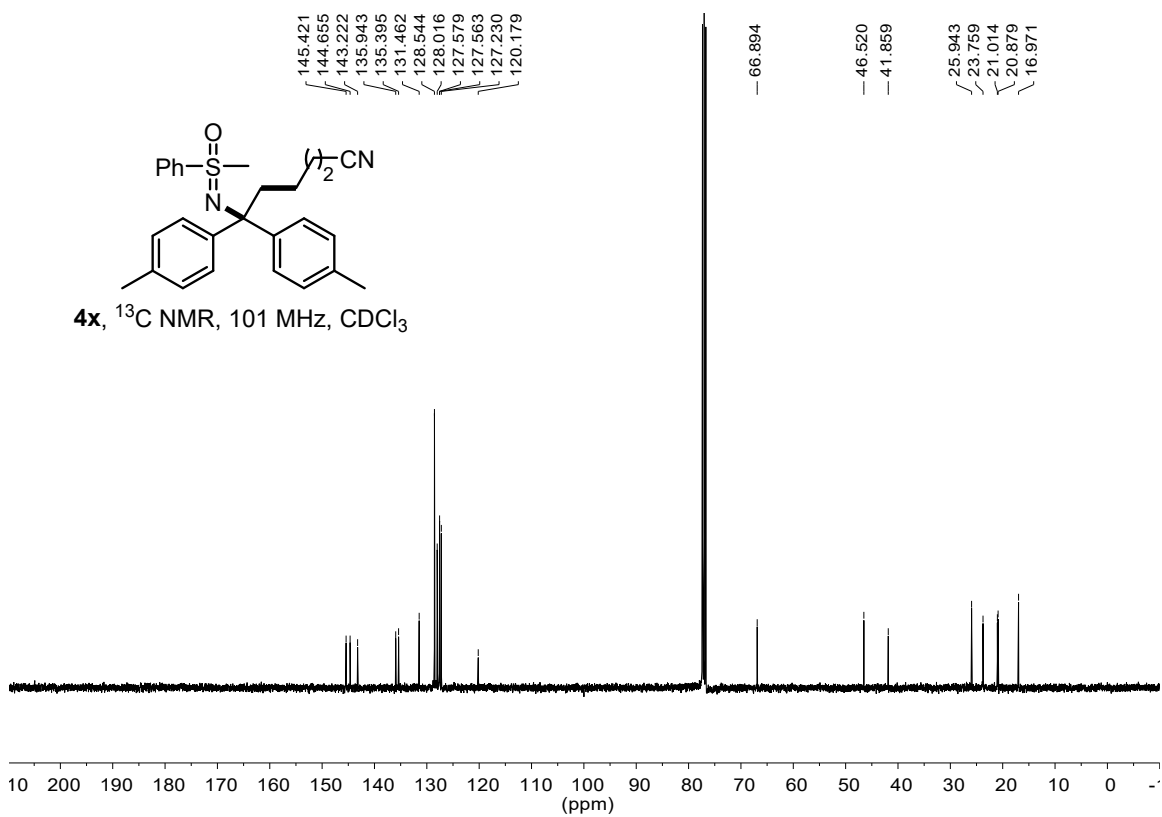

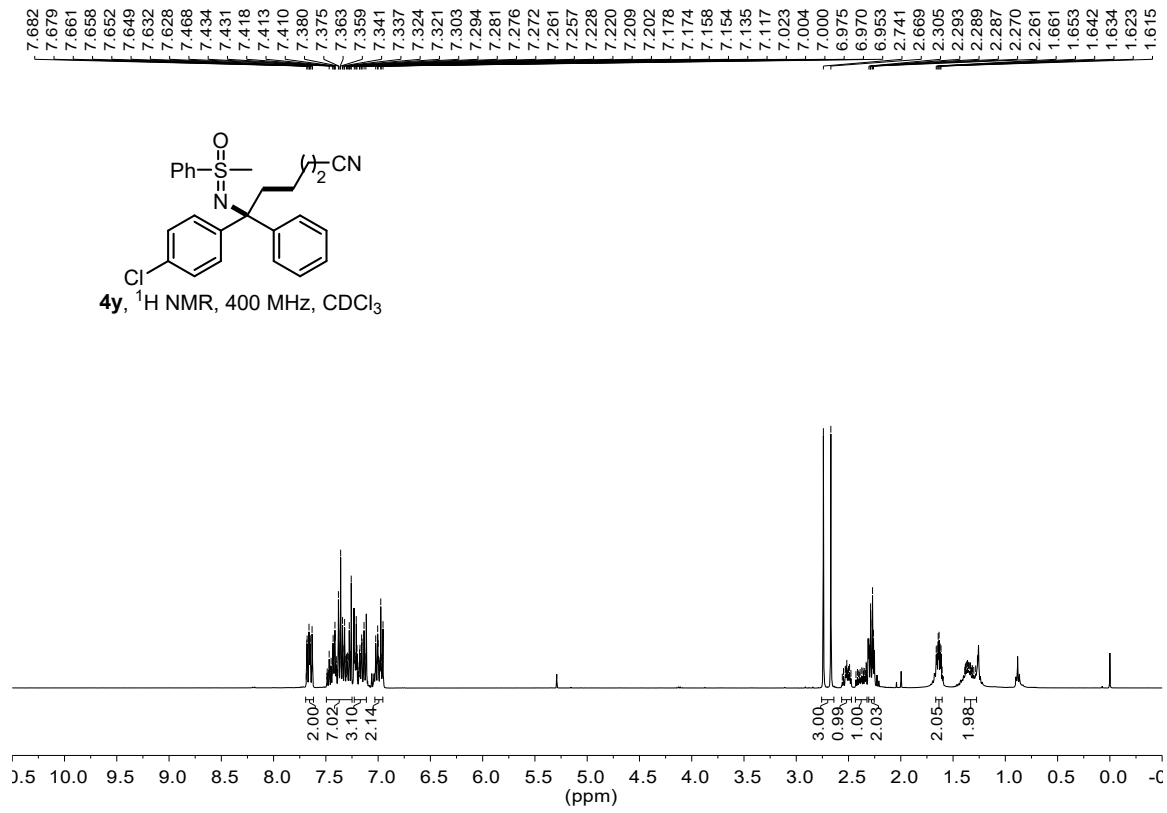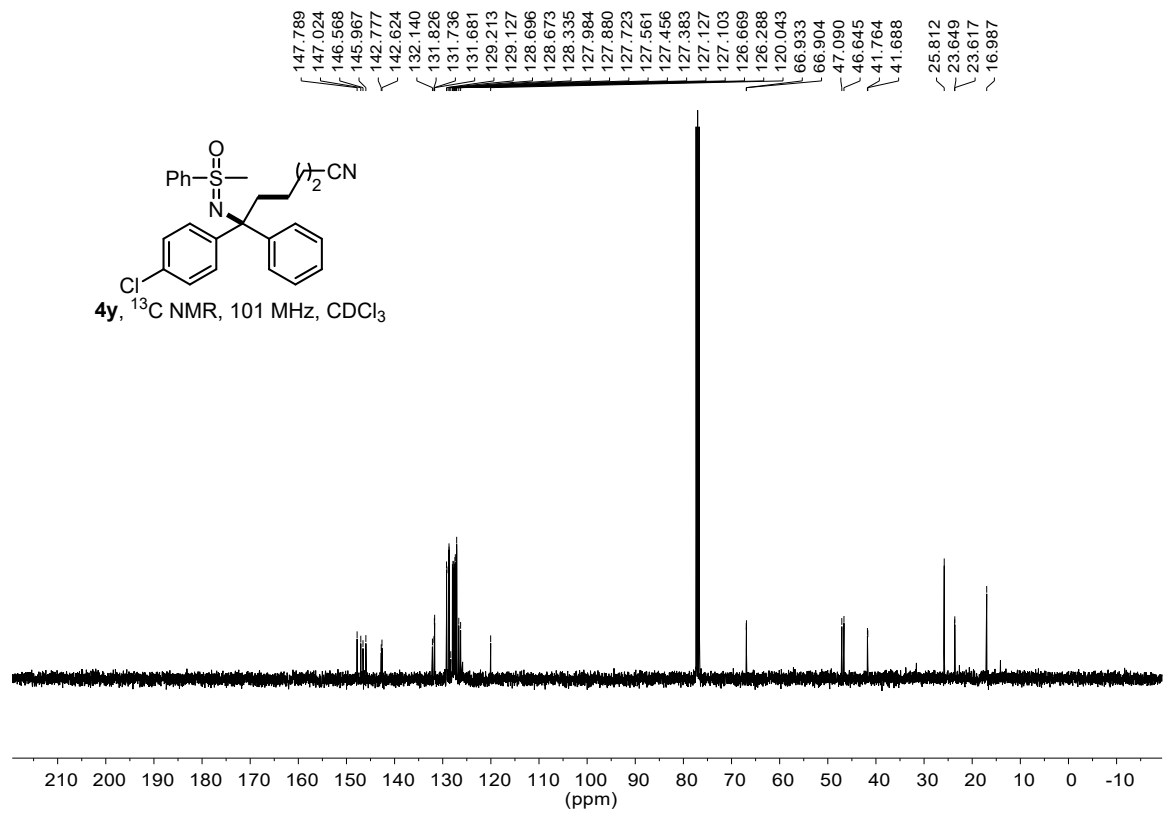

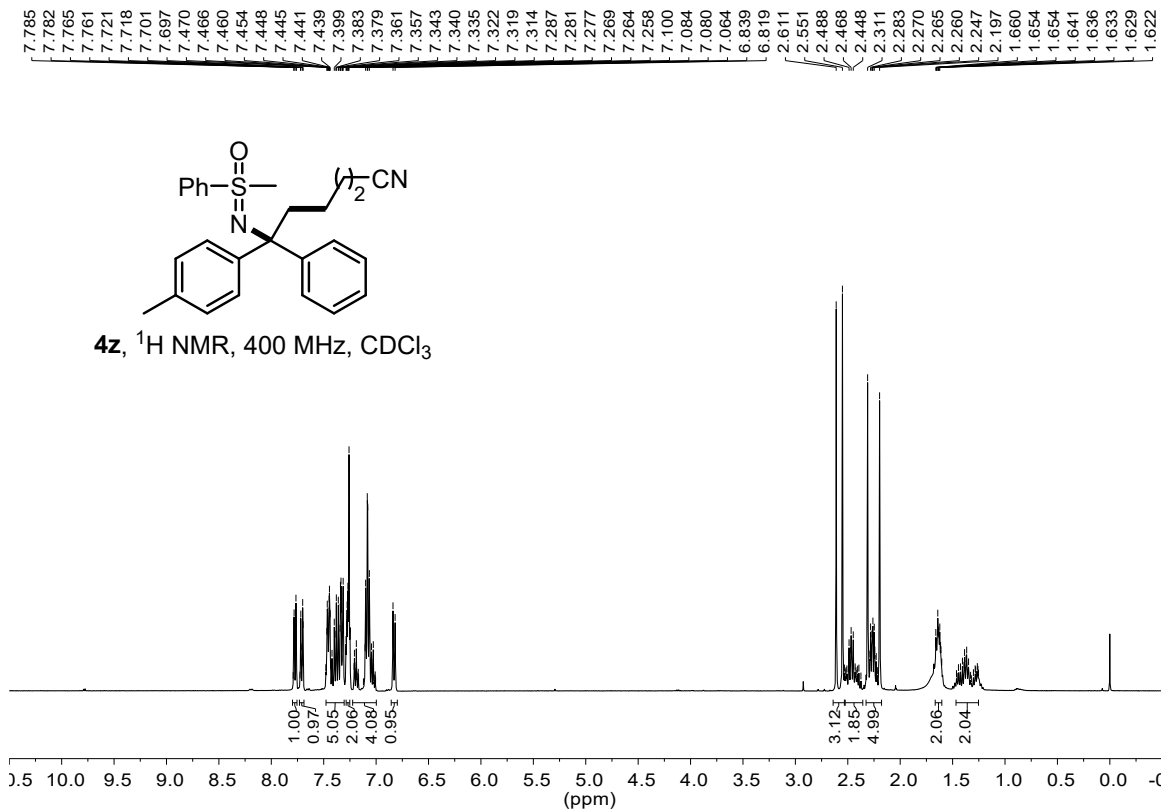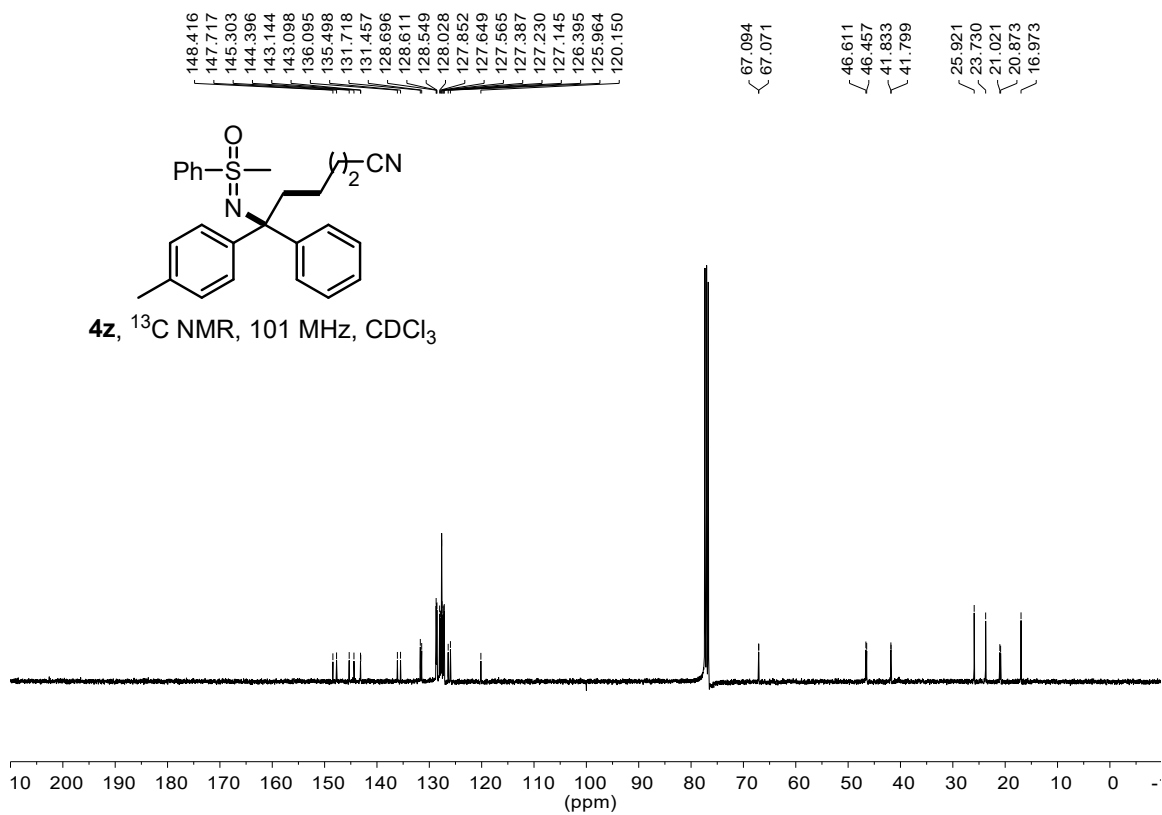

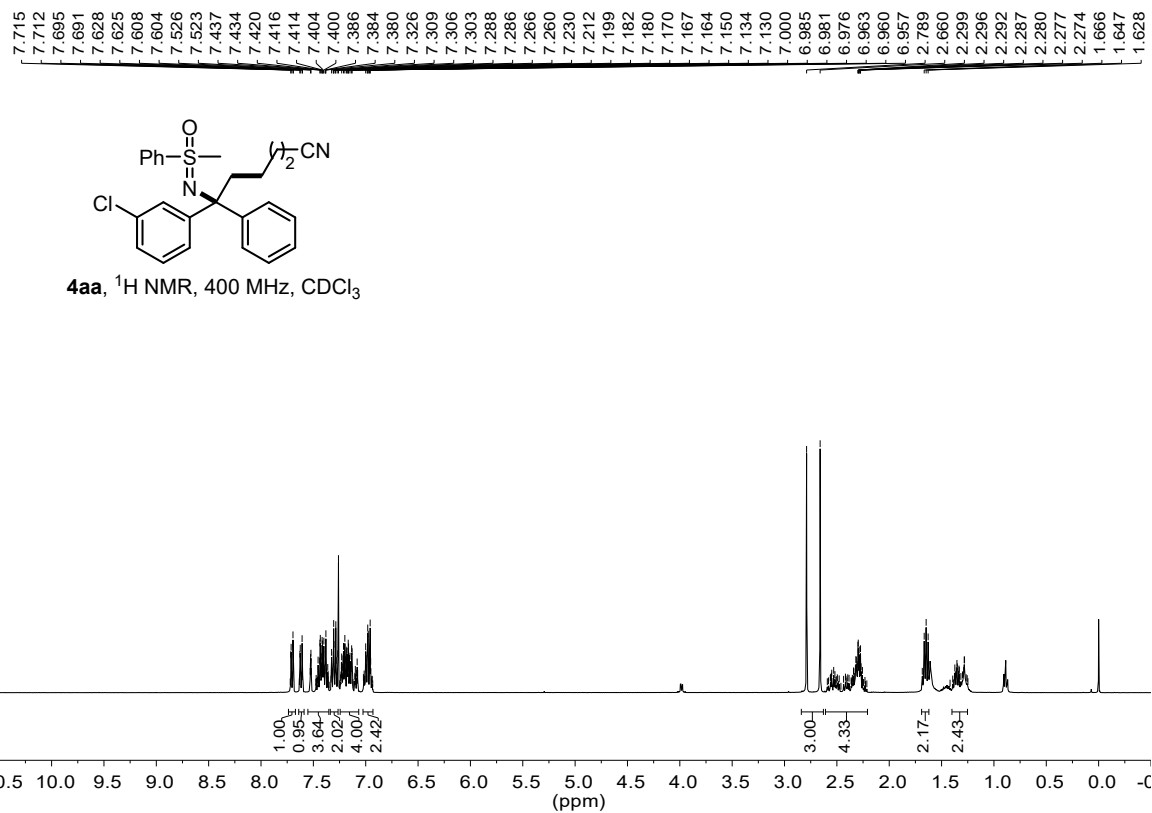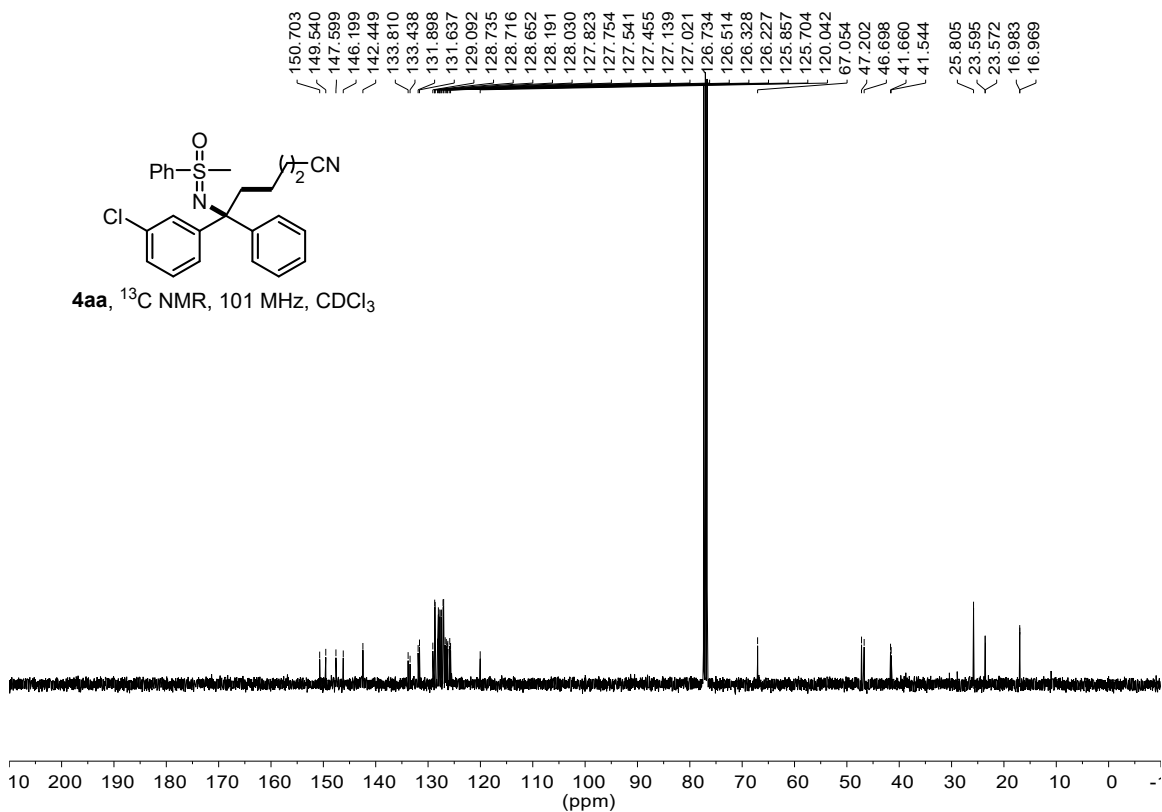

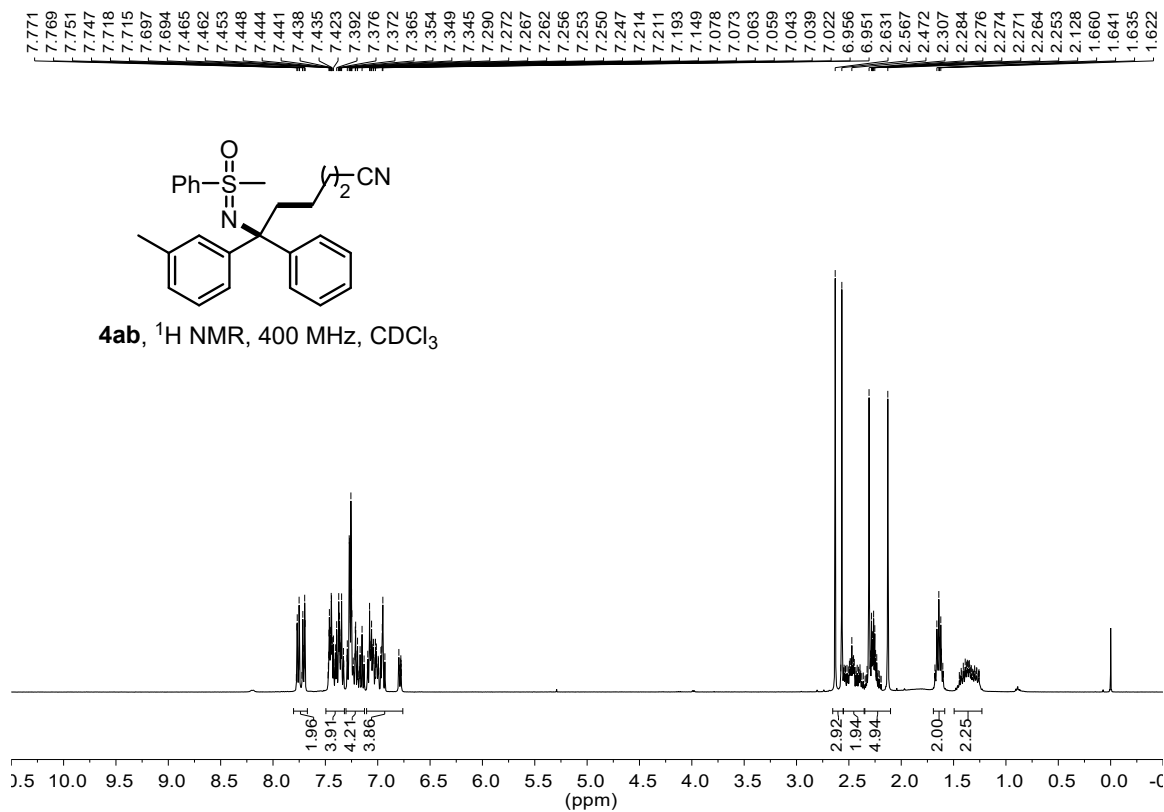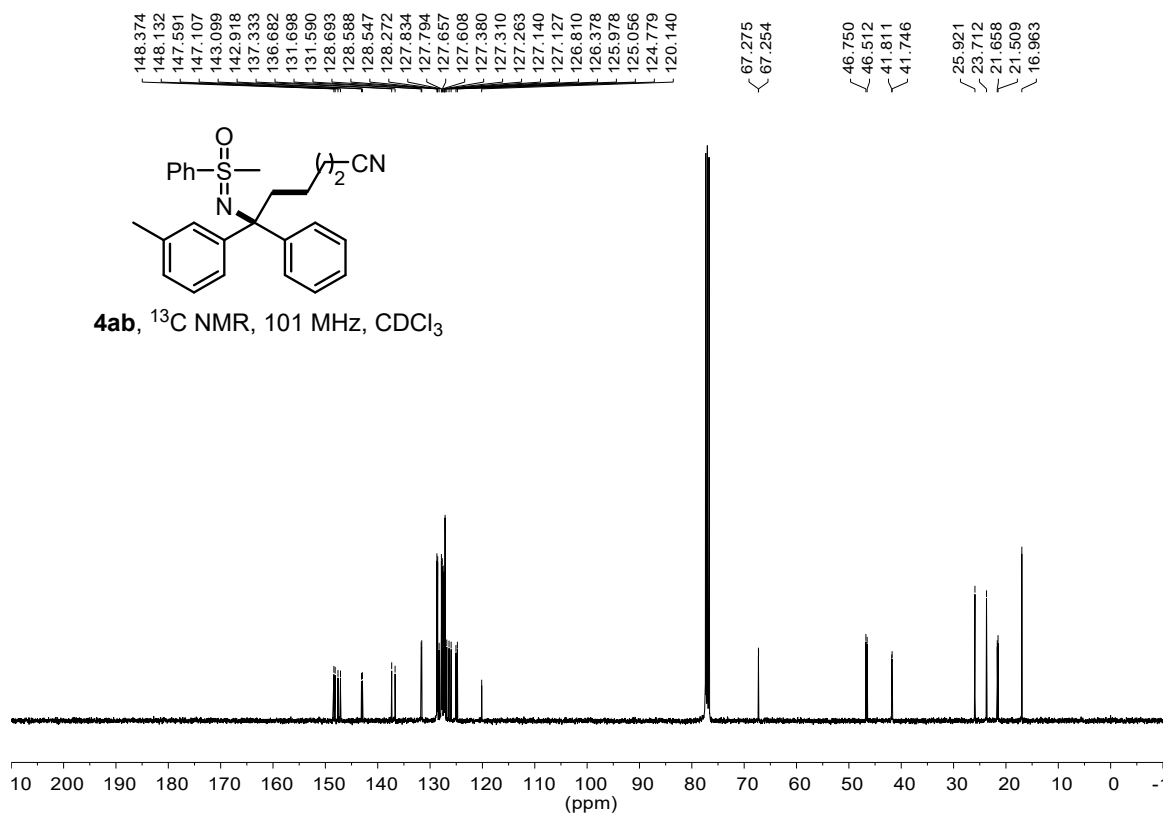

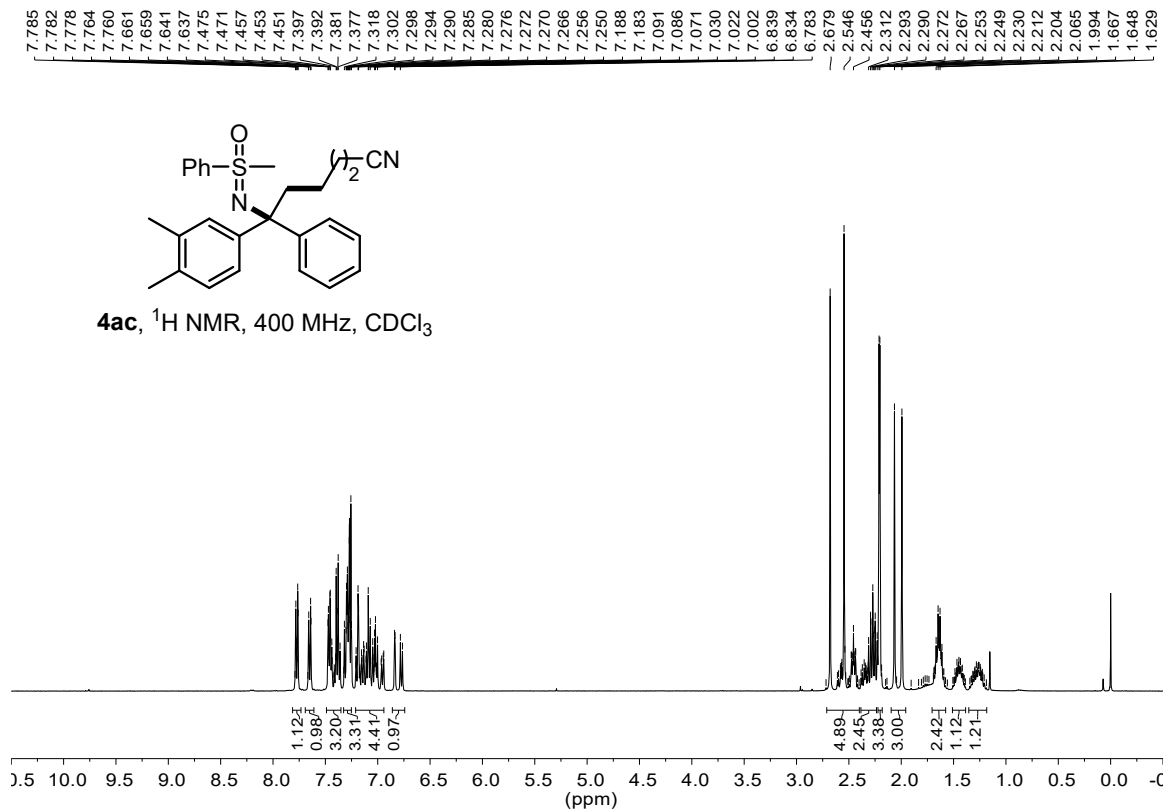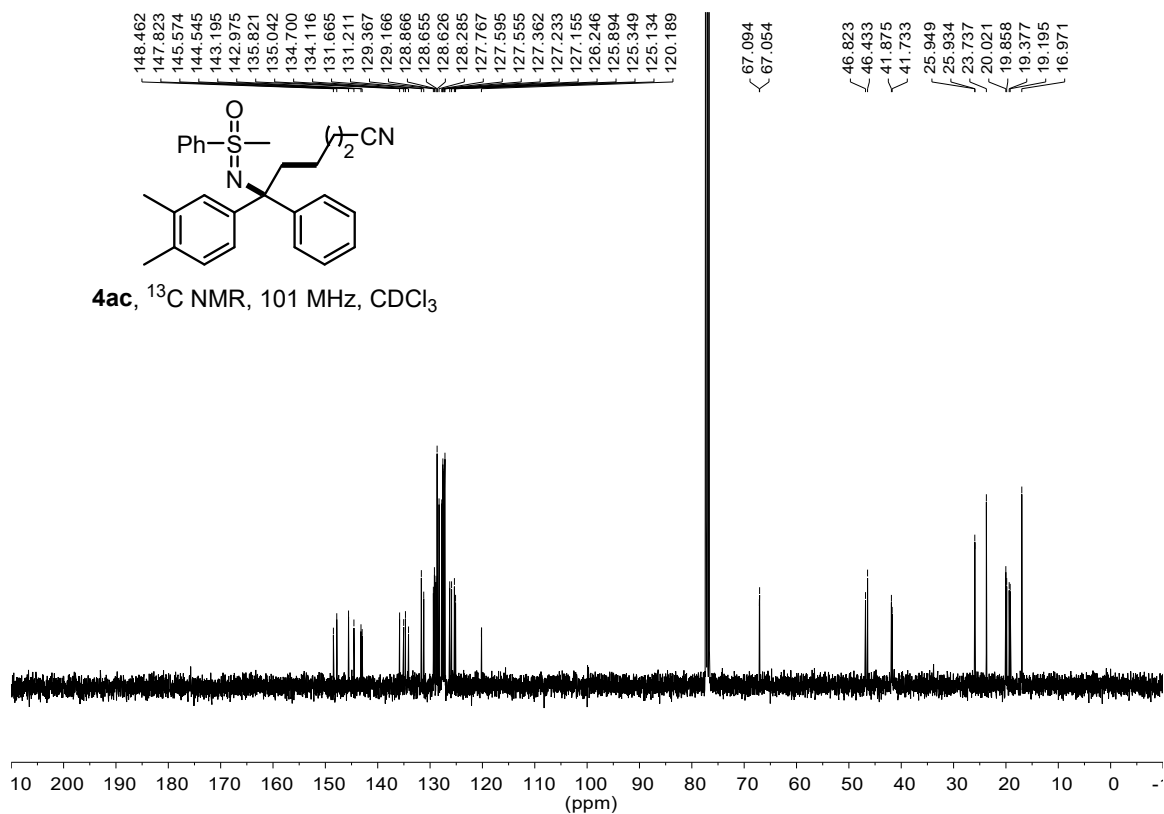

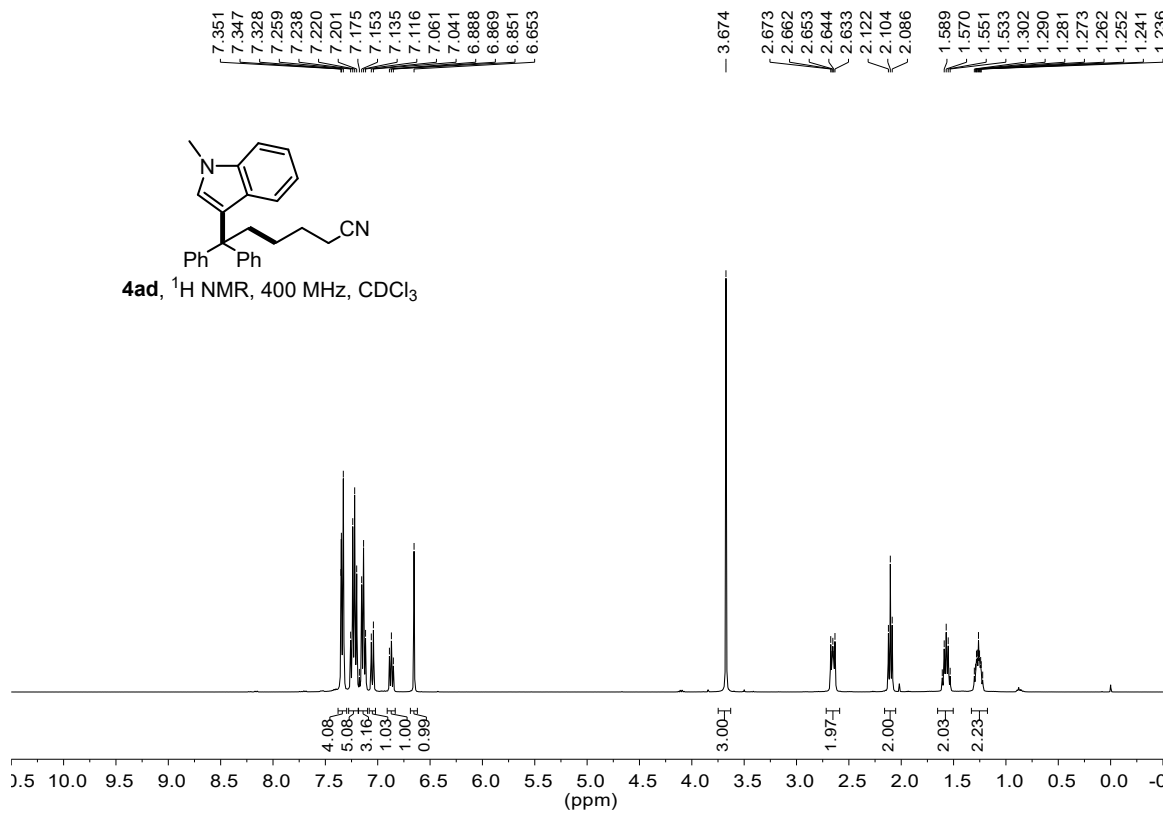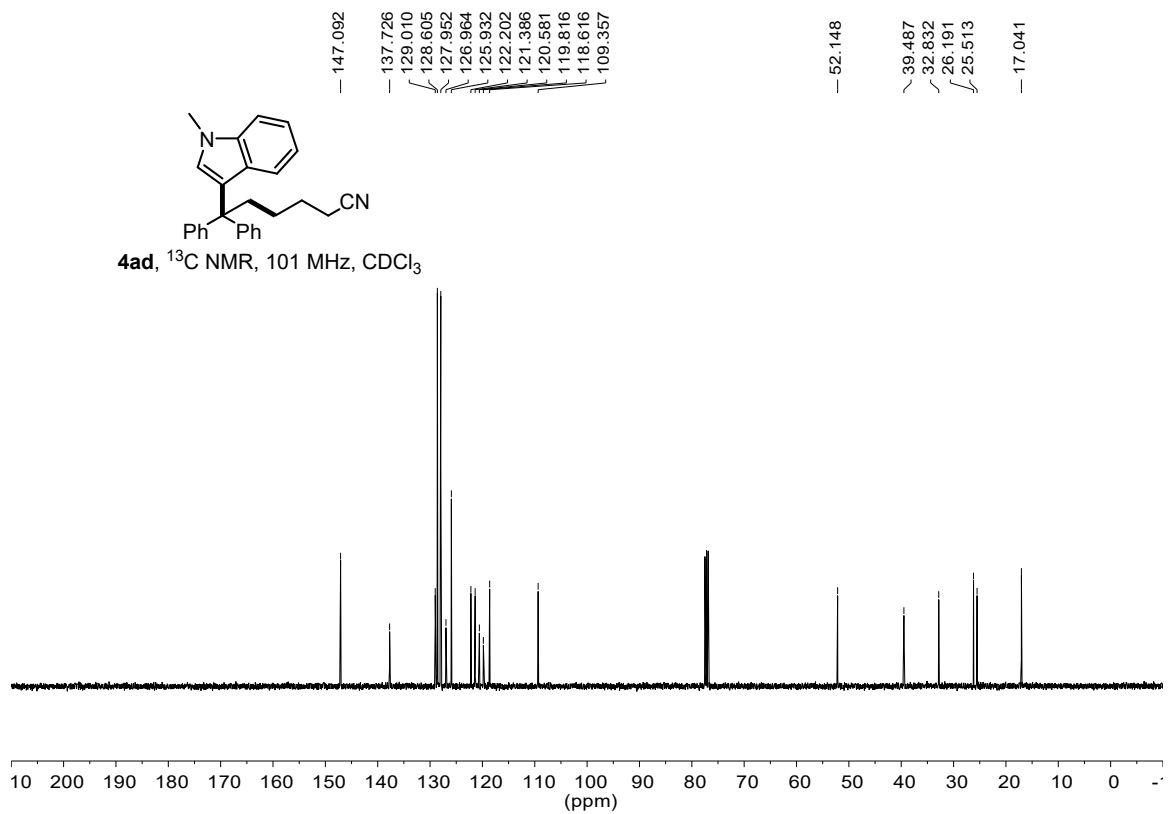



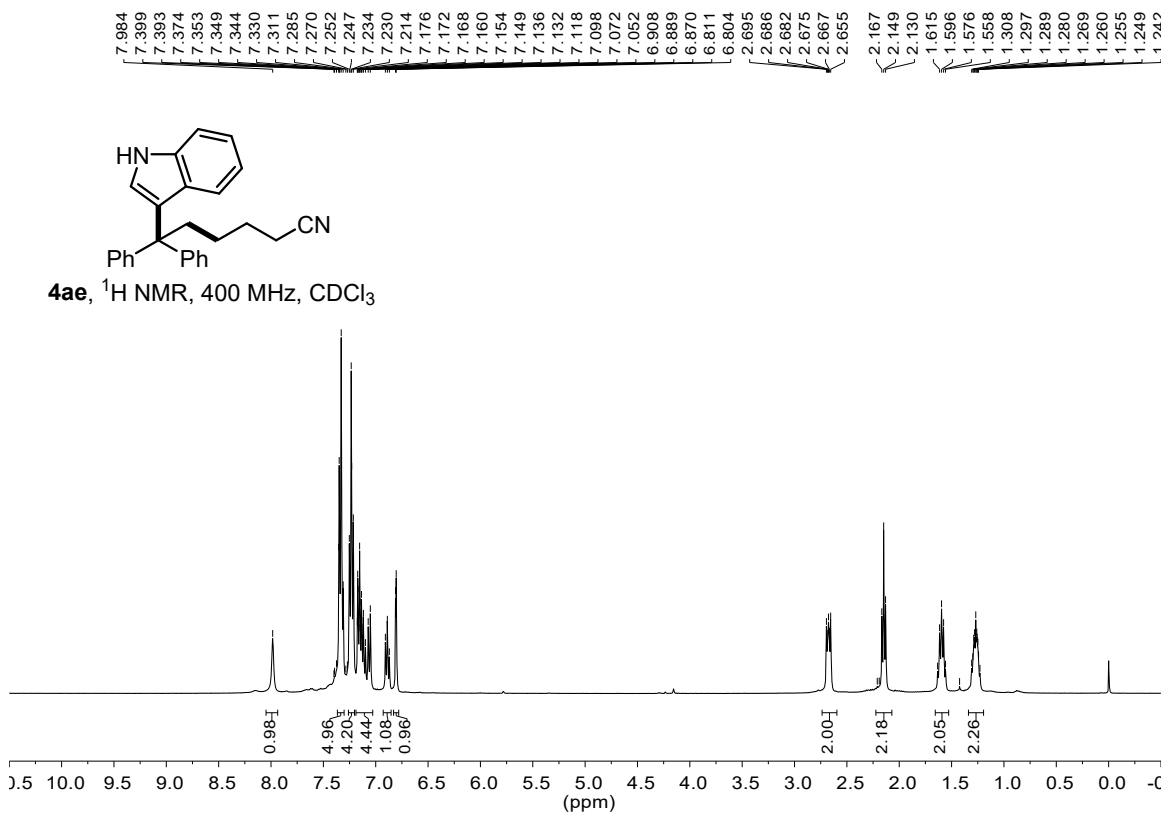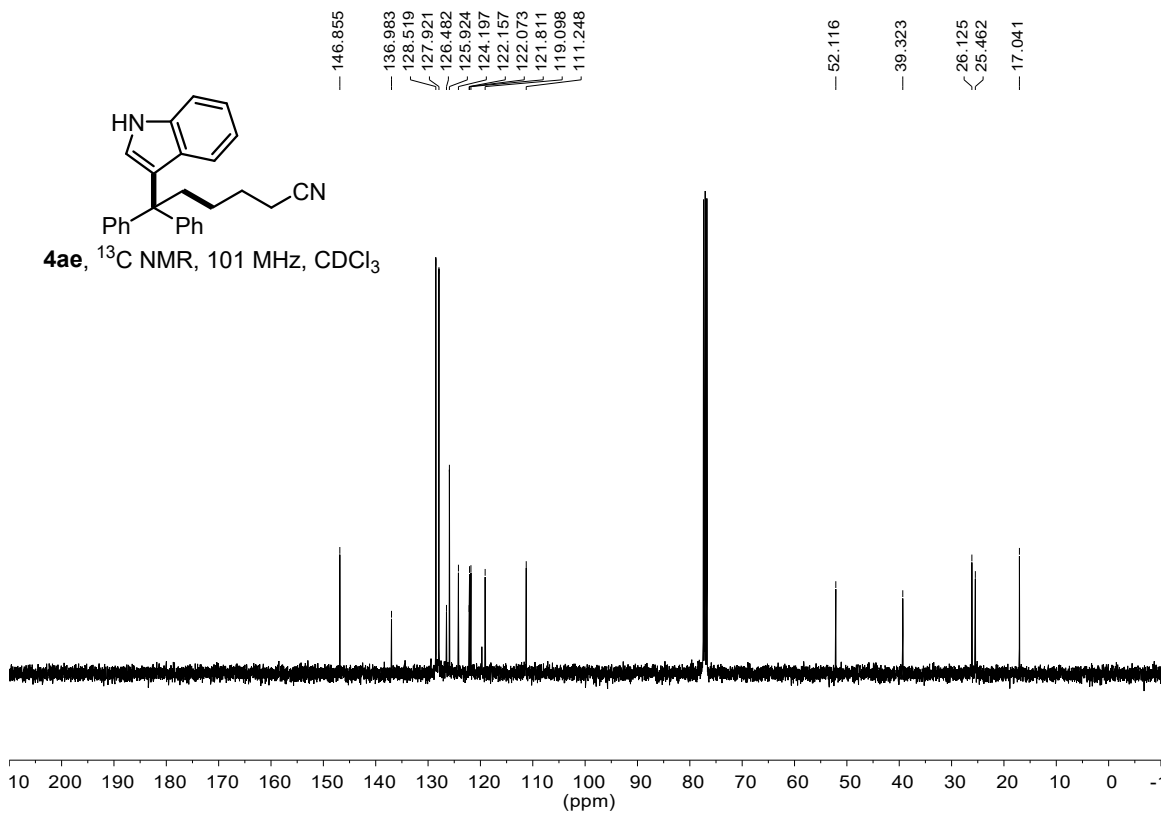

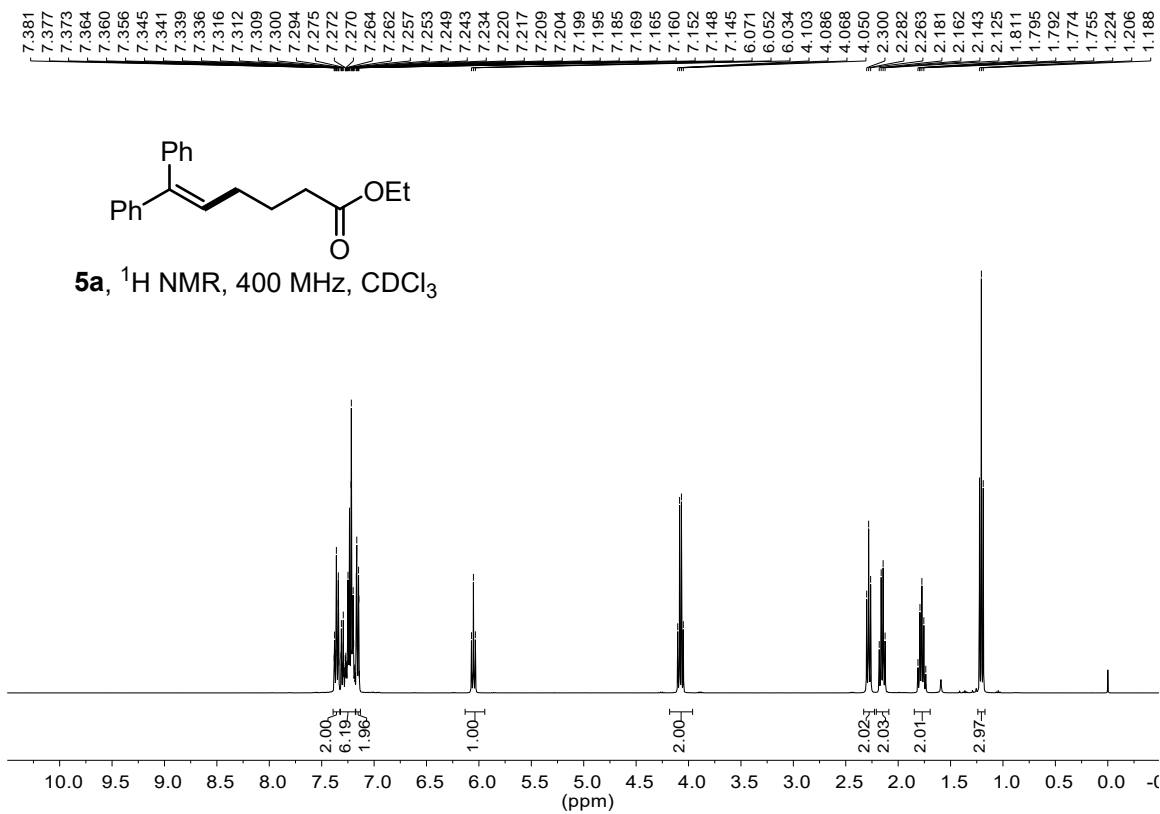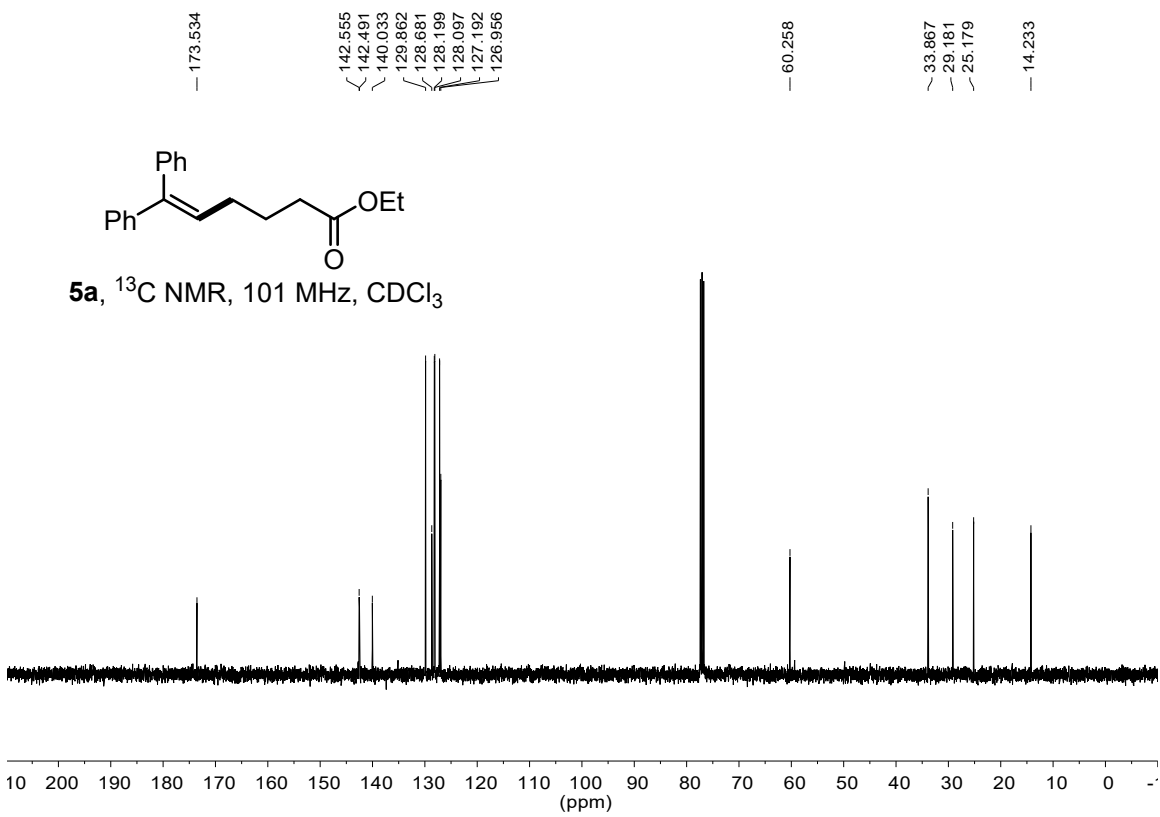

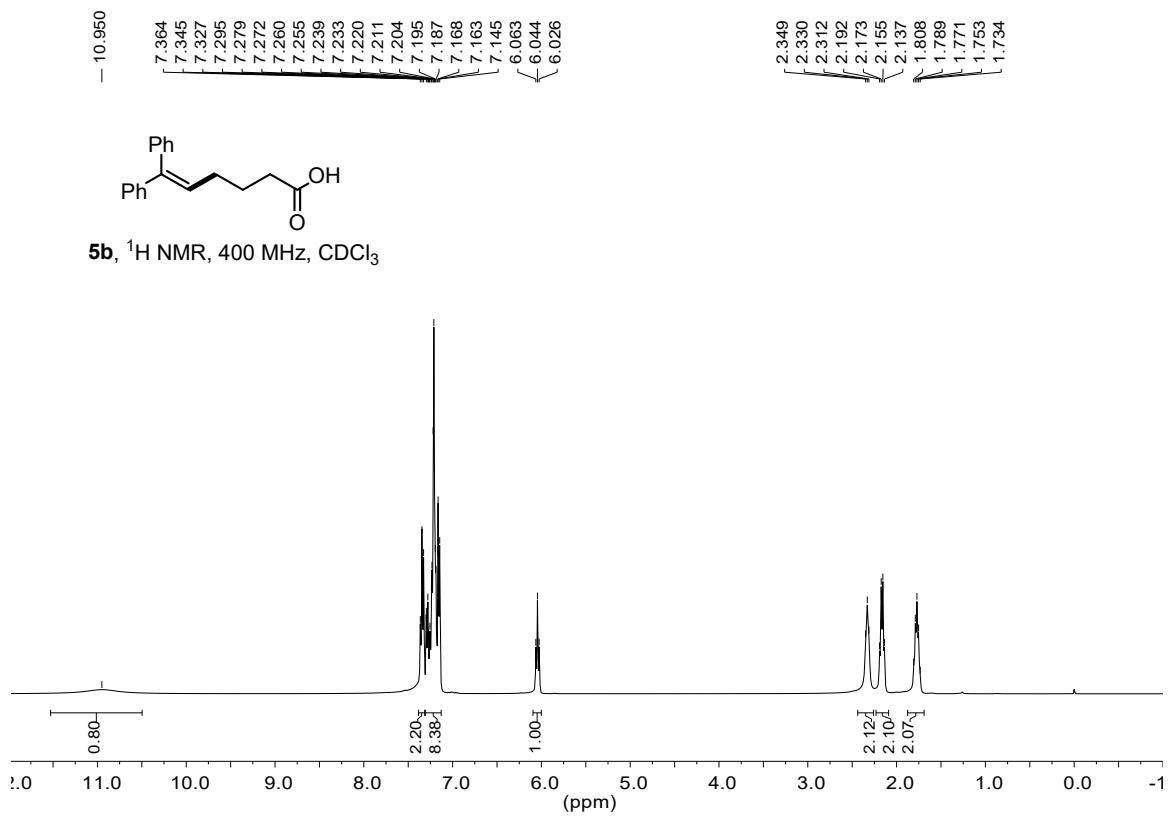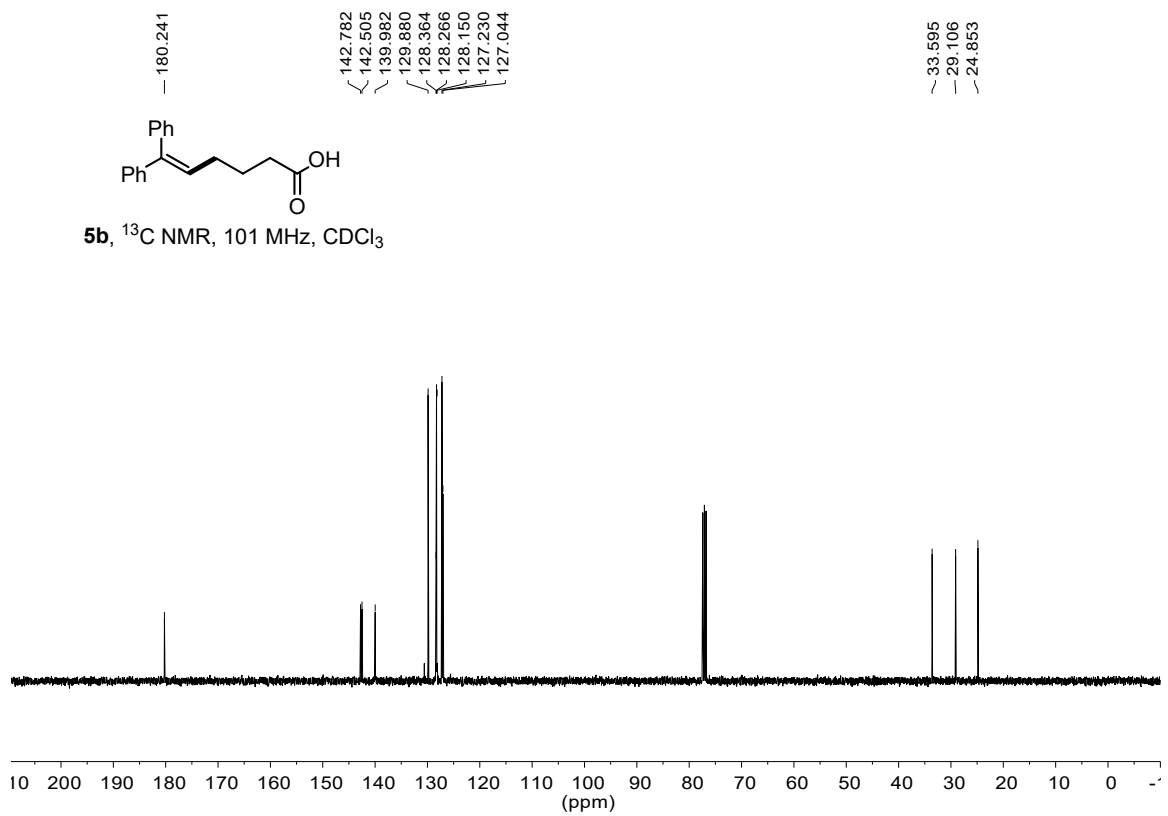

7.396  
7.384  
7.371  
7.338  
7.335  
7.325  
7.280  
7.269  
7.266  
7.255  
7.241  
7.239  
7.230  
7.222  
7.219  
7.210  
7.208  
7.206  
7.164  
7.161  
7.150  
6.027  
6.015  
6.003

2.317  
2.305  
2.293  
2.283  
2.270  
2.258  
2.246  
1.824  
1.812  
1.799  
1.787  
1.775

-0.000

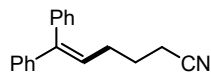

**6**,  $^1\text{H}$  NMR, 600 MHz,  $\text{CDCl}_3$

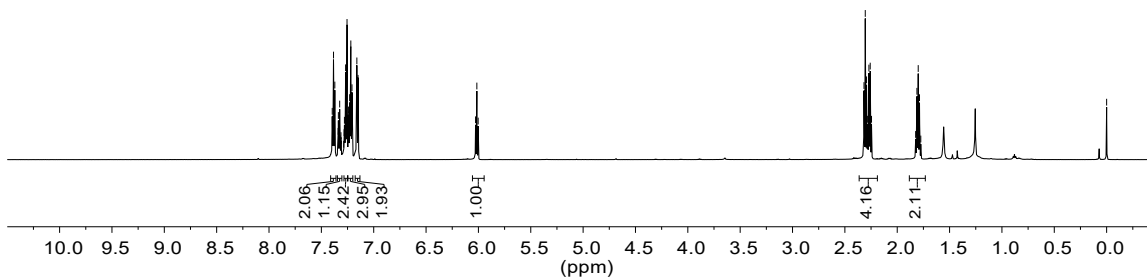

143.836  
142.122  
139.619  
129.684  
128.378  
128.178  
127.262  
127.245  
127.182  
126.598  
119.501

28.721  
25.772  
16.702

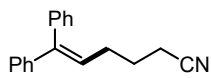

**6**,  $^{13}\text{C}$  NMR, 151 MHz,  $\text{CDCl}_3$

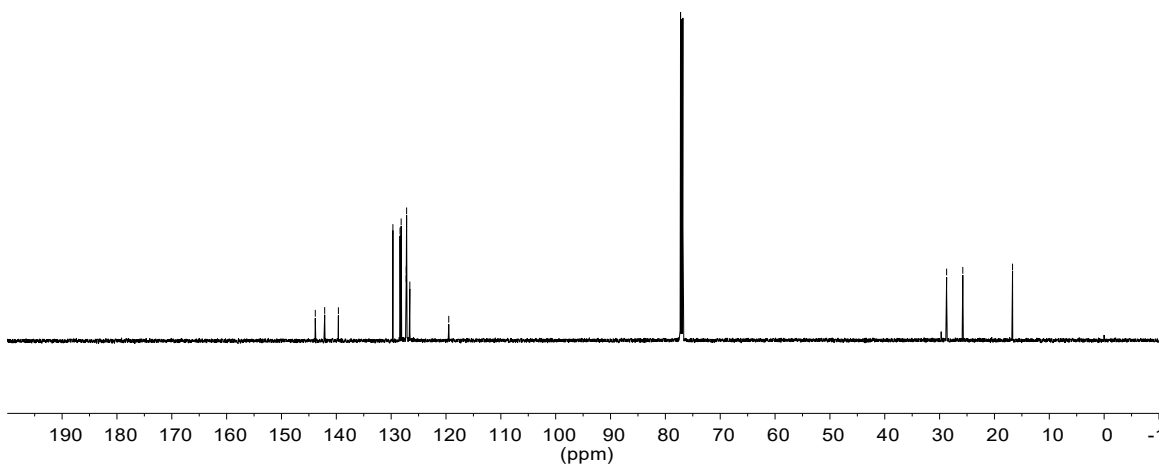

## 6. References

1. X.-Y. Yu, J.-R. Chen, P.-Z. Wang, M.-N. Yang, D. Liang and W.-J. Xiao, *A Visible-Light-Driven Iminyl Radical-Mediated C–C Single Bond Cleavage/Radical Addition Cascade of Oxime Esters*, *Angew. Chem. Int. Ed.*, 2018, **57**, 738-743.
2. G. Zhang, H. Tan, W. Chen, H. C. Shen, Y. Lu, C. Zheng and H. Xu, *Synthesis of NH-Sulfoximines by Using Recyclable Hypervalent Iodine(III) Reagents under Aqueous Micellar Conditions*, *ChemSusChem*, 2020, **13**, 922-928.
